# Supplementary material
Source: publisher site journal article supplement (https://www.dovepress.com/get_supplementary_file.php?f=148662.xlsx)
Supplement: Supplementary file 1 [file get_supplementary_file.php]

## Sheet: Sheet1
Press F9 to resample
For sample type: 1 for high tumor stage and high expression of USP22, 2 for high tumor stage and low expression of USP22, 3 for low tumor stage and high expression of USP22, 4 for low tumor stage and low expression of USP22
Study	sample ID	sample type		re-sampling group 1	re-sampling group 2	re-sampling group 3	re-sampling group 4	re-sampling group 5	re-sampling group 6	re-sampling group 7	re-sampling group 8	re-sampling group 9	re-sampling group 10	re-sampling group 11	re-sampling group 12	re-sampling group 13	re-sampling group 14	re-sampling group 15	re-sampling group 16	re-sampling group 17	re-sampling group 18	re-sampling group 19	re-sampling group 20	re-sampling group 21	re-sampling group 22	re-sampling group 23	re-sampling group 24	re-sampling group 25	re-sampling group 26	re-sampling group 27	re-sampling group 28	re-sampling group 29	re-sampling group 30	re-sampling group 31	re-sampling group 32	re-sampling group 33	re-sampling group 34	re-sampling group 35	re-sampling group 36	re-sampling group 37	re-sampling group 38	re-sampling group 39	re-sampling group 40	re-sampling group 41	re-sampling group 42	re-sampling group 43	re-sampling group 44	re-sampling group 45	re-sampling group 46
	1	1		2	1	2	1	2	4	2	2	2	2	1	3	2	1	2	4	2	4	4	2	2	1	2	4	2	4	2	2	3	1	2	4	4	4	1	2	4	2	4	2	2	4	1	2	1	2
	2	1		4	4	2	2	2	4	2	1	4	2	2	2	1	2	2	4	3	4	2	2	4	2	2	3	2	4	2	4	1	2	1	2	2	2	2	2	4	2	4	1	2	4	1	2	2	2
	3	1		4	2	2	2	4	4	2	2	2	2	3	2	4	1	2	2	2	1	1	2	2	2	4	4	4	4	2	2	4	4	4	2	2	2	2	3	3	3	2	4	1	2	4	1	1	4
	4	1		2	4	4	3	2	1	2	2	2	2	2	2	2	4	2	2	4	1	2	1	4	4	1	2	2	1	3	4	4	4	4	4	4	2	1	2	2	2	2	1	2	4	2	4	2	3
	5	1		2	4	1	1	3	2	2	4	2	2	4	2	4	2	3	2	1	3	2	2	4	2	4	4	4	2	3	2	4	1	2	2	4	2	2	2	2	2	3	4	1	4	2	2	4	2
	6	1		2	4	2	2	2	1	3	4	2	2	4	2	2	3	2	2	2	1	2	4	2	2	2	2	2	4	4	4	4	2	3	4	4	2	1	4	4	2	2	2	4	2	2	4	2	2
	7	1		2	4	4	2	3	2	1	3	4	1	1	4	2	1	1	1	2	1	2	2	2	2	4	1	4	2	2	2	3	2	4	2	3	1	4	2	4	4	4	2	1	2	1	4	3	2
	8	1		4	2	2	4	2	1	2	1	3	3	2	4	2	2	2	4	4	2	3	4	1	2	2	1	2	2	2	1	4	1	2	2	4	4	3	2	2	4	4	2	4	2	4	2	4	1
	9	1		4	2	4	3	4	4	2	2	2	2	1	4	2	4	4	2	2	3	2	4	4	1	1	4	2	4	4	2	2	2	3	4	2	4	4	2	2	4	2	3	2	3	2	2	2	3
	10	1		4	1	2	2	4	2	3	2	2	2	2	2	3	2	4	2	2	4	4	2	2	3	4	4	1	2	2	2	1	4	2	1	2	2	2	4	2	2	1	2	1	2	4	1	4	2
	11	1		1	4	2	4	2	2	2	2	2	2	3	2	2	4	4	2	2	2	1	1	4	2	2	4	4	2	4	2	3	1	3	2	2	2	1	1	4	2	2	2	2	2	2	2	3	2
	12	1		1	1	2	2	4	2	2	2	4	2	4	2	2	2	2	1	2	1	2	2	2	1	4	1	4	2	4	4	2	1	2	2	2	4	4	2	4	2	4	1	2	2	2	3	2	1
	13	1		2	2	1	2	2	3	2	1	2	3	2	2	4	4	4	1	2	2	4	2	2	4	2	2	3	4	3	1	4	2	2	2	2	2	4	1	4	4	4	1	2	3	4	2	4	2
	14	1		4	2	1	4	4	2	4	2	2	1	2	2	4	4	4	4	2	2	2	4	1	1	2	1	2	2	4	1	4	2	2	1	4	2	4	4	2	4	2	4	2	3	4	4	2	4
	15	1		2	1	4	4	2	2	2	2	1	4	2	3	4	4	4	1	2	1	2	2	2	2	2	4	3	2	2	2	4	2	4	1	4	4	2	2	1	4	2	1	1	2	4	2	2	4
	16	1		4	4	2	4	4	2	4	2	2	4	2	1	1	1	1	4	2	4	2	2	2	2	4	2	2	2	2	4	1	4	4	4	4	2	1	1	1	2	2	3	2	2	1	4	4	2
	17	1		4	1	4	2	4	4	4	2	3	2	1	2	4	1	4	1	2	4	2	1	4	2	2	2	4	4	2	1	2	3	4	4	2	4	2	4	2	4	2	2	1	1	2	2	2	4
	18	1		4	4	1	4	4	2	2	4	4	1	4	1	2	1	3	2	2	2	2	4	2	2	2	2	2	2	3	2	1	4	2	2	3	4	2	2	4	2	2	2	4	3	2	2	1	4
	19	1		1	2	4	4	4	2	1	4	3	2	1	2	2	2	2	4	2	3	1	4	1	1	4	2	4	1	2	2	4	2	4	2	2	4	1	2	2	4	3	1	2	2	4	3	2	3
	20	1		4	2	1	2	3	2	4	4	2	2	2	4	1	4	3	3	2	2	1	2	2	2	1	4	2	2	4	2	4	2	4	1	4	4	4	2	4	2	2	4	4	1	1	2	1	4
	21	1		2	1	2	2	2	2	4	2	4	1	4	3	1	4	2	1	1	2	3	4	4	2	4	4	4	2	2	2	2	1	1	4	2	2	4	4	4	1	2	4	2	3	4	1	2	4
	22	1		4	2	4	2	1	2	4	4	1	2	1	2	2	2	4	2	2	4	2	2	2	2	2	2	4	1	4	2	2	2	1	4	4	2	4	4	2	4	2	1	4	4	4	4	2	3
	23	1		1	2	2	2	4	4	2	4	2	4	2	2	2	4	4	2	2	2	2	2	4	4	1	4	3	2	3	4	4	3	2	2	4	4	4	2	3	2	4	2	2	4	4	3	1	2
	24	1		4	4	4	2	3	3	4	3	2	2	2	2	4	4	4	2	2	2	2	2	4	1	2	2	2	4	4	4	2	4	2	2	2	2	2	4	2	1	4	2	4	4	4	1	2	2
	25	1		1	4	2	2	2	1	2	2	4	1	1	4	3	2	1	2	4	2	4	1	2	2	2	2	4	4	4	2	2	3	4	4	4	1	2	1	4	4	4	2	1	2	2	4	2	1
	26	1		1	3	2	4	4	2	1	1	4	4	4	1	4	4	2	4	1	1	2	4	4	1	1	1	1	4	4	4	2	2	2	1	2	2	4	4	3	2	2	1	2	1	2	4	4	4
	27	1		2	4	2	2	2	4	2	2	4	4	4	2	2	2	4	1	2	4	3	4	2	4	1	2	2	2	2	4	4	4	2	1	2	4	1	1	2	2	2	2	2	1	4	4	2	3
	28	1		4	4	2	2	4	4	4	1	2	2	1	1	4	4	2	2	4	3	2	2	2	4	2	3	3	2	1	4	2	2	2	2	1	2	2	4	4	1	4	1	2	4	2	2	4	4
	29	1		2	2	2	4	2	1	4	3	2	2	2	2	2	1	2	2	4	3	1	2	2	1	2	4	2	3	4	2	2	2	2	4	3	2	2	4	2	3	1	1	4	4	2	2	4	2
	30	2		2	4	4	2	2	2	4	4	4	2	1	4	4	2	4	1	2	2	2	4	4	1	2	4	2	4	2	4	2	4	2	2	4	4	2	1	2	1	2	1	4	4	1	2	4	4
	31	2		2	4	1	2	2	4	1	1	4	1	2	4	3	2	4	4	4	4	2	4	2	2	3	4	1	2	2	2	1	2	2	2	2	4	2	2	2	2	1	3	1	2	3	2	2	4
	32	2		2	4	4	2	4	1	4	1	2	2	2	2	3	3	1	2	2	4	2	2	1	1	2	2	4	4	4	2	2	4	2	3	2	2	3	2	2	4	2	1	2	2	2	2	2	4
	33	2		1	2	1	4	4	1	2	2	2	4	2	2	4	1	1	1	1	1	2	1	4	2	4	4	1	2	4	2	2	2	2	4	1	3	2	2	2	1	2	1	4	2	4	1	4	2
	34	2		2	2	2	1	2	4	2	3	4	1	2	2	4	2	2	2	1	2	2	2	2	2	2	4	2	2	4	2	4	1	1	4	3	4	4	3	4	1	2	3	4	2	4	4	1	3
	35	2		2	2	4	2	4	4	4	4	4	2	2	2	2	2	2	4	2	2	2	2	2	2	4	2	2	2	2	4	2	1	2	4	1	4	4	4	2	3	4	4	3	4	4	4	2	1
	36	2		1	4	2	4	2	3	4	2	4	2	2	3	2	2	1	4	3	2	4	2	2	4	1	1	4	1	4	2	2	2	4	2	2	2	1	2	2	1	2	4	4	1	4	3	2	4
	37	2		4	4	2	1	2	3	1	2	3	2	4	2	4	2	2	4	2	2	2	1	1	2	2	2	4	2	4	2	2	4	1	2	2	4	2	2	4	2	2	2	4	3	2	2	1	4
	38	2		2	2	2	4	2	2	2	2	4	2	2	2	2	3	1	4	2	2	2	4	3	2	4	1	1	2	4	4	2	4	3	2	4	4	4	4	4	1	4	2	2	4	1	4	1	1
	39	2		1	2	2	1	2	2	4	2	2	2	2	4	2	1	2	2	2	1	2	2	4	2	4	3	4	1	4	4	2	2	1	2	2	4	1	1	4	4	2	4	4	4	2	4	2	2
	40	2		2	3	3	2	3	4	2	4	4	4	2	2	2	2	3	2	2	3	2	2	2	4	2	1	3	2	2	2	1	4	4	4	4	4	2	1	4	4	2	4	3	2	2	4	4	4
	41	2		2	4	3	2	3	2	2	4	2	4	2	1	2	2	4	4	2	4	1	4	4	1	2	2	4	4	4	2	2	2	2	2	2	2	3	4	2	4	2	1	3	2	2	1	1	4
	42	2		1	2	4	2	2	2	2	2	1	4	2	2	2	4	1	4	2	4	2	2	2	4	4	2	2	2	4	2	2	2	2	2	4	2	4	4	1	2	3	3	2	2	2	2	1	3
	43	2		1	4	3	4	4	2	1	2	2	2	1	2	2	2	2	2	2	1	2	4	3	2	2	4	2	4	4	2	2	3	3	2	2	2	3	1	2	2	2	2	4	2	4	4	1	2
	44	2		2	4	4	2	2	2	2	2	4	2	4	3	2	4	2	4	2	2	4	3	2	4	3	3	2	2	4	2	4	2	1	4	4	1	4	4	2	2	4	1	1	2	4	1	1	4
	45	2		4	2	3	2	2	2	2	3	4	2	2	4	2	2	2	4	2	2	2	4	2	1	3	1	4	4	4	1	1	2	2	2	4	1	4	2	2	1	2	4	1	2	2	4	1	1
	46	3		2	2	4	2	4	2	3	4	4	4	4	1	4	1	1	4	2	2	3	4	2	2	1	4	2	4	4	2	2	2	2	3	1	2	2	2	1	2	4	2	3	2	4	2	4	4
	47	3		4	4	4	4	4	2	1	4	2	2	3	2	2	2	1	4	2	4	4	2	2	3	2	2	4	1	2	2	4	2	1	3	4	2	4	2	2	1	1	2	1	2	4	4	1	4
	48	3		2	2	2	4	2	2	4	3	2	2	4	2	2	2	4	4	4	2	4	2	2	3	4	1	1	1	4	2	2	2	1	2	3	2	3	1	1	4	2	3	4	3	4	2	1	1
	49	3		4	4	2	1	2	4	4	1	2	2	4	2	3	4	4	4	4	2	2	4	2	2	4	2	2	2	2	4	2	2	2	2	2	1	4	3	2	2	4	1	4	4	1	3	2	2
	50	3		2	4	2	2	3	4	4	2	2	4	1	4	4	4	2	1	1	2	2	2	2	2	3	1	4	2	2	1	4	2	1	2	4	1	4	4	4	2	2	4	2	4	4	2	4	4
	51	3		2	2	2	2	3	4	2	4	2	1	2	4	2	4	2	2	2	4	4	1	4	2	1	3	1	4	2	2	2	2	4	4	2	2	2	2	2	2	2	2	2	2	3	2	3	2
	52	3		1	2	2	2	4	2	2	1	2	4	2	2	1	2	1	2	4	2	2	4	2	2	2	3	2	1	2	1	2	2	4	4	2	2	4	2	2	4	1	4	4	2	2	2	4	1
	53	3		2	4	3	2	4	2	2	2	2	2	2	1	3	2	2	2	2	1	4	3	4	4	2	3	1	2	4	2	4	2	3	1	4	4	4	4	4	2	2	1	2	2	4	1	4	2
	54	3		2	2	4	4	4	2	2	2	4	2	4	1	4	1	2	1	2	4	4	1	2	2	2	1	2	2	2	1	4	3	2	1	4	2	4	4	2	2	2	4	2	2	2	4	2	2
	55	3		4	2	2	4	1	4	2	1	2	3	2	4	2	2	2	4	2	2	4	2	2	4	4	2	2	2	1	2	4	2	1	2	2	4	4	4	2	1	4	4	2	2	4	2	2	2
	56	3		2	2	2	4	2	1	3	2	2	1	4	2	4	4	2	2	1	2	2	2	1	2	2	2	3	4	2	2	4	2	2	2	2	2	4	4	2	1	2	2	4	4	2	2	4	4
	57	3		4	2	2	4	4	1	2	1	2	1	4	4	2	4	4	2	2	4	1	2	1	3	2	2	2	1	1	3	4	2	2	1	2	4	2	3	4	2	2	2	2	4	2	2	1	2
	58	3		2	2	2	2	1	2	1	4	2	4	2	1	3	2	4	2	1	4	2	3	2	2	3	4	2	4	2	2	4	2	4	2	4	3	4	2	2	2	3	2	1	4	1	1	3	2
	59	3		2	2	2	4	1	2	2	2	2	4	1	2	2	2	2	1	4	2	4	4	2	2	2	2	1	2	2	4	4	2	2	2	2	2	4	2	4	4	4	1	4	4	2	4	2	2
	60	3		2	4	2	3	4	2	2	2	4	2	2	2	4	4	2	4	2	2	4	4	1	3	2	2	2	4	4	2	2	4	2	2	2	2	1	1	2	2	4	1	2	2	2	3	4	2
	61	3		2	4	2	4	2	4	2	4	2	2	2	4	1	4	2	4	2	1	2	2	2	3	1	2	2	1	2	1	2	2	2	2	4	4	2	4	4	2	2	4	2	1	2	2	4	4
	62	4		2	2	1	4	2	1	2	4	2	2	4	2	4	4	4	2	2	4	4	4	2	1	1	4	2	1	4	2	4	4	2	2	3	3	1	2	2	1	2	2	2	4	2	2	2	2
	63	4		4	4	2	2	2	2	1	4	4	3	2	4	1	2	2	4	4	3	2	2	3	4	2	2	2	4	3	4	4	2	2	2	2	4	1	2	2	2	2	1	4	3	3	2	1	4
	64	4		2	1	4	4	2	4	2	1	4	2	3	2	4	4	2	4	4	2	2	4	2	2	3	4	2	2	1	3	3	1	4	1	2	1	2	2	1	4	4	4	2	2	2	1	4	1
	65	4		2	3	2	4	1	2	1	2	4	4	2	2	2	2	4	1	2	1	2	2	4	4	3	2	4	2	2	2	1	2	2	4	4	4	4	2	2	2	1	1	4	2	4	2	1	4
	66	4		1	4	4	1	4	2	4	4	4	4	4	3	1	1	1	2	2	4	4	2	1	1	2	2	2	4	4	3	4	3	2	2	4	4	2	2	2	4	3	1	4	2	2	3	2	3
	67	4		2	4	4	2	4	2	3	3	1	2	2	4	2	1	3	1	2	1	1	2	4	4	2	4	1	2	2	1	2	2	1	2	1	2	3	4	4	4	2	2	4	4	2	2	4	1
	68	4		4	4	2	4	2	2	1	4	3	2	2	3	2	1	4	4	2	4	2	2	4	2	4	2	1	2	4	4	2	1	1	3	2	4	2	2	4	4	2	2	4	2	4	2	2	4
	69	4		4	2	3	1	2	4	4	2	1	4	1	2	2	2	2	3	4	4	4	2	2	2	2	2	4	2	2	4	4	2	2	2	1	4	2	4	4	1	2	2	1	1	2	2	4	3
	70	4		2	1	2	1	1	1	2	4	4	4	4	4	4	2	2	4	2	4	1	2	2	2	2	2	2	2	4	4	2	4	4	2	2	2	4	4	2	2	2	1	3	3	2	4	4	2
	71	4		1	2	2	2	4	2	1	4	2	1	4	1	4	4	1	4	1	4	3	1	2	2	2	2	4	2	2	4	2	2	1	1	2	2	4	4	2	4	2	1	1	2	3	1	2	4
	72	4		4	2	4	4	4	1	4	2	1	2	2	2	4	2	1	1	2	2	4	2	2	2	2	2	2	4	2	2	1	3	2	2	1	4	2	2	1	4	2	2	4	1	2	2	4	2
	73	4		1	2	4	3	3	2	1	3	4	2	4	4	2	4	1	2	3	1	2	3	1	4	2	4	4	2	1	2	2	4	2	2	4	3	2	4	2	2	2	4	2	4	2	2	2	1
	74	4		1	4	4	2	1	2	2	4	2	2	2	4	2	4	1	1	2	2	2	1	1	2	4	4	4	2	2	1	4	1	2	4	3	1	4	1	1	4	4	4	3	1	4	2	2	4
	75	4		4	2	2	4	3	2	2	1	2	4	3	2	4	3	1	1	2	4	2	4	4	1	4	4	1	4	4	1	2	2	2	2	4	2	2	2	2	4	2	1	1	2	1	2	4	2
	76	4		4	2	3	4	2	4	3	4	1	2	3	2	4	1	2	4	1	4	4	2	1	3	2	2	4	3	2	4	2	1	4	2	2	3	4	2	2	4	2	1	4	2	2	2	1	2
	77	4		2	4	3	2	2	2	1	3	4	4	4	4	2	1	2	1	4	2	2	2	4	2	4	4	2	2	4	2	1	4	2	2	1	1	2	1	2	4	1	2	4	4	4	2	2	2
	78	4		1	2	3	2	1	4	2	4	2	3	4	3	2	1	2	4	4	2	2	1	1	2	4	4	2	4	4	3	1	2	1	4	2	2	3	2	2	2	3	2	2	1	2	2	3	4
	79	4		3	4	2	1	4	3	2	2	2	2	2	2	1	4	4	4	4	2	1	2	2	1	2	2	3	4	2	3	2	1	3	4	1	3	1	4	2	2	2	4	4	2	2	1	2	4
	80	4		4	2	2	2	4	4	2	2	1	2	4	3	4	1	2	1	4	2	2	2	3	2	4	4	2	4	3	4	2	2	4	4	2	2	1	2	4	2	2	2	2	4	2	2	4	1
	81	4		1	2	2	2	2	2	2	3	2	4	1	1	2	2	1	1	4	2	3	2	4	2	1	2	4	2	2	1	4	2	2	3	2	1	1	2	4	2	4	4	2	2	2	2	4	1
	82	4		2	4	1	1	2	1	2	4	4	2	2	2	2	2	2	2	2	2	4	1	4	4	2	2	4	3	2	2	2	1	1	2	1	2	4	4	2	4	1	1	2	2	4	1	4	2
	83	4		4	4	4	2	1	2	1	4	2	4	4	2	2	4	1	4	1	2	3	2	4	2	2	2	4	2	2	1	1	2	1	2	2	2	2	4	2	4	1	1	2	4	2	2	2	4
	84	4		4	2	4	2	2	1	3	2	2	1	4	3	2	1	2	2	2	4	2	4	4	2	1	4	4	4	4	2	2	3	4	3	1	2	2	4	2	2	2	1	2	2	4	1	4	2
	85	4		4	1	1	4	2	3	3	2	4	2	4	4	4	3	2	1	4	2	2	2	1	4	4	4	4	1	4	2	4	1	4	3	2	2	4	4	2	2	2	2	2	1	1	2	2	2
	86	4		2	1	2	2	2	2	2	4	2	3	4	2	2	2	1	2	4	2	2	4	2	3	1	1	3	2	1	2	1	4	4	2	4	4	2	2	3	4	4	4	4	4	3	2	2	4
	87	4		1	2	2	2	2	1	3	2	2	4	2	1	2	2	2	2	4	2	1	4	2	2	2	2	3	4	2	2	2	4	3	2	1	1	4	2	4	4	2	4	4	2	4	2	1	1
	88	4		3	4	2	2	2	1	4	2	4	4	2	2	2	2	4	3	2	2	2	2	1	4	2	4	2	4	1	2	2	2	2	1	1	4	2	2	4	2	2	4	2	4	2	2	4	2
	89	4		4	2	4	2	2	4	4	2	2	2	2	4	2	1	2	2	2	2	2	2	2	1	1	4	2	4	4	4	3	2	4	2	2	2	4	2	2	2	1	4	2	4	2	4	1	2
	90	4		4	3	2	2	3	2	2	4	1	2	1	4	2	2	2	1	2	2	4	2	4	2	2	4	2	2	4	4	2	2	2	4	4	4	2	2	4	4	2	1	2	3	2	2	3	1
	1	1		2	3	1	4	4	2	2	2	4	2	2	2	2	4	4	4	4	4	2	3	4	1	2	2	2	4	1	2	2	4	2	2	1	4	2	2	2	2	1	2	4	3	2	3	2	2
	2	1		2	1	2	4	2	4	1	2	1	4	2	2	4	3	4	1	4	2	2	2	1	2	2	4	2	3	2	4	2	4	4	2	2	2	2	4	3	1	4	2	4	2	1	3	1	1
	3	1		1	4	2	4	2	2	2	1	2	1	2	2	2	1	4	4	2	1	3	4	3	1	3	2	3	1	4	4	2	1	2	2	2	3	4	2	1	1	2	1	2	2	1	2	2	1
	4	1		2	2	2	2	2	3	4	2	2	1	2	2	4	4	2	3	2	4	4	3	3	2	1	4	1	4	4	3	2	1	4	1	1	1	2	2	1	4	1	2	2	2	1	1	1	2
	5	1		4	1	4	2	2	4	2	4	2	2	4	1	4	4	2	2	1	1	2	2	1	3	2	3	2	2	2	1	1	2	2	2	2	2	2	4	4	4	2	3	2	4	4	2	4	2
	6	1		3	2	4	1	2	2	2	2	2	2	2	4	2	2	4	1	4	4	4	1	4	2	2	2	1	3	4	2	4	2	4	4	2	2	2	1	4	4	2	4	2	2	4	4	1	1
	7	1		2	2	1	2	2	2	2	2	2	1	2	1	4	4	2	4	4	4	4	4	4	2	4	4	2	2	4	2	1	2	4	2	4	4	2	2	4	1	1	4	4	2	2	2	2	4
	8	1		4	4	4	2	2	2	2	2	1	1	1	4	2	4	1	4	2	2	4	2	2	3	2	2	1	2	4	2	2	4	4	4	2	1	2	1	4	2	1	4	2	2	4	2	4	2
	9	1		2	2	2	2	2	4	4	4	2	3	2	4	1	2	2	2	1	2	2	2	4	2	1	4	3	2	2	2	4	2	1	4	2	2	4	2	2	1	2	2	4	4	3	4	4	2
	10	1		2	2	2	4	1	2	1	1	4	2	4	1	2	2	2	2	2	1	4	4	4	2	2	4	4	2	2	2	4	2	1	4	2	4	4	2	2	2	1	1	2	4	1	2	2	1
	11	1		4	4	2	1	1	2	3	2	4	3	2	4	2	2	2	3	4	2	2	2	4	1	4	2	2	4	2	2	2	4	1	2	2	2	2	2	2	2	1	4	2	4	2	4	2	4
	12	1		2	4	4	2	4	1	4	4	4	1	2	4	3	1	1	4	4	2	2	2	1	2	2	3	4	4	2	2	1	2	1	1	3	4	4	4	2	1	4	4	4	4	4	1	2	2
	13	1		2	4	2	2	2	2	2	2	2	4	4	4	4	4	2	2	2	4	4	1	4	2	4	4	2	2	2	4	4	4	1	1	4	4	4	4	2	2	2	2	2	1	1	2	2	2
	14	1		2	2	1	2	1	2	1	2	2	2	2	2	1	2	1	4	4	2	2	2	1	4	3	4	4	4	4	4	2	2	2	2	4	3	2	1	4	4	2	2	4	4	2	4	1	2
	15	1		2	4	4	3	4	3	1	2	3	1	2	2	2	2	2	4	2	4	4	1	2	2	3	4	4	1	4	4	4	2	2	4	2	4	4	4	2	2	4	2	2	4	1	3	2	4
	16	1		1	3	4	4	4	4	2	2	4	4	1	4	4	2	4	4	2	2	1	2	4	2	2	2	2	4	4	2	4	1	1	4	2	2	2	2	2	2	2	4	1	2	4	2	2	2
	17	1		1	2	2	2	2	2	4	3	4	2	4	1	4	1	4	1	2	2	3	2	4	4	4	2	4	2	2	3	2	4	4	2	2	2	2	2	2	4	4	2	2	1	2	2	2	2
	18	1		3	2	3	2	4	2	2	2	1	4	1	3	1	2	3	1	2	2	4	4	4	2	2	2	2	1	4	4	4	4	1	1	4	2	4	2	2	2	4	3	4	2	2	3	2	4
	19	1		2	2	4	4	4	2	2	2	2	1	4	4	3	3	2	4	2	4	2	1	4	4	2	4	2	2	1	2	4	2	2	3	4	4	2	3	1	4	2	3	4	4	3	4	4	2
	20	1		2	4	4	2	4	2	2	2	1	3	2	2	4	2	4	2	2	2	2	2	2	4	4	4	4	2	4	4	2	2	4	2	4	1	1	4	2	2	1	2	4	2	2	4	4	4
	21	1		4	4	4	2	2	2	2	2	2	2	2	2	1	3	1	2	3	2	2	2	2	1	4	1	4	2	2	4	2	4	2	2	2	4	2	2	2	2	1	4	4	1	4	1	2	4
	22	1		2	1	2	1	2	2	4	4	4	4	4	1	2	3	2	2	2	2	2	2	4	4	4	2	1	3	4	4	2	2	2	1	2	2	4	2	2	2	2	2	4	3	3	2	4	2
	23	1		2	2	2	4	4	4	4	2	4	2	2	2	2	4	4	4	4	2	1	1	4	4	4	2	1	1	1	2	4	2	4	2	1	4	2	2	2	2	3	2	2	2	2	2	2	2
	24	1		4	3	4	2	1	2	1	2	2	2	4	3	2	1	4	1	4	4	4	3	2	3	3	4	2	4	2	4	2	2	2	1	2	2	3	3	2	2	2	3	4	1	2	1	2	2
	25	1		2	2	3	2	2	4	4	4	2	2	4	2	4	2	4	4	2	4	4	4	1	1	2	1	4	4	2	2	2	2	2	1	2	4	2	2	2	2	2	2	2	1	2	2	1	2
	26	1		3	1	2	1	4	2	2	1	2	2	4	2	2	2	2	4	1	4	4	4	2	2	1	4	2	2	2	2	1	2	1	2	2	2	2	4	4	2	3	2	3	1	2	4	2	4
	27	1		2	2	2	2	4	4	2	2	1	2	2	4	2	4	4	2	4	4	1	2	4	2	2	4	4	2	2	2	2	4	1	4	2	1	4	2	2	1	1	1	2	4	2	2	2	2
	28	1		2	2	4	2	2	2	2	2	4	3	4	2	2	2	4	2	2	4	2	3	1	4	2	2	2	2	2	2	4	1	2	2	1	3	2	3	3	1	1	2	2	1	4	2	2	2
	29	1		4	2	4	4	2	3	4	4	2	2	4	4	1	2	3	4	1	4	3	2	2	2	2	2	2	4	2	4	1	1	2	1	2	4	1	2	2	4	1	1	2	2	2	4	1	4
	30	1		4	4	4	4	4	3	1	4	4	2	4	2	1	1	4	3	1	4	4	2	4	2	2	4	2	2	2	4	1	4	3	1	3	4	4	2	4	2	3	2	2	1	2	2	2	2
	31	1		1	4	4	2	2	2	1	1	2	1	2	4	2	2	2	1	4	2	2	2	4	2	2	2	1	4	1	3	4	2	1	2	2	1	1	4	2	3	4	2	2	1	2	2	2	4
	32	1		4	4	4	2	2	2	2	4	2	1	4	4	2	2	1	2	4	3	2	2	2	1	2	2	4	4	2	4	4	3	1	4	4	1	2	2	1	2	4	2	4	4	2	4	2	4
	33	1		2	4	4	4	1	4	4	4	1	4	2	1	4	4	3	2	3	4	4	3	4	2	2	2	2	1	1	2	2	4	1	2	4	4	2	4	2	4	2	4	2	1	2	2	1	2
	34	1		2	1	2	1	1	1	1	4	3	4	1	4	1	4	2	2	4	4	2	4	2	3	2	1	2	2	2	2	1	2	2	4	4	2	2	2	2	1	4	2	2	2	2	2	1	1
	35	1		4	2	2	2	1	1	2	1	3	4	2	3	4	2	1	2	2	2	4	2	2	4	4	3	3	2	2	1	4	2	4	2	2	2	2	2	3	2	1	4	2	1	4	1	4	2
	36	1		4	2	4	4	4	4	2	4	2	1	4	1	4	3	1	2	2	4	4	2	3	1	4	2	2	2	4	2	2	4	1	2	2	4	2	1	2	2	2	2	4	4	2	1	4	2
	37	1		4	1	2	1	2	4	1	4	3	2	2	2	2	2	1	4	4	4	2	1	4	2	2	2	1	4	2	2	2	1	2	1	1	4	2	2	2	2	1	4	2	1	2	1	4	2
	38	1		1	1	2	2	4	2	4	1	4	2	4	4	1	3	2	4	2	2	4	1	2	2	3	2	2	2	2	4	4	1	4	2	2	1	1	1	3	1	4	3	1	4	4	4	4	3
	39	1		1	2	2	4	4	2	1	2	4	2	2	4	2	2	2	2	4	1	4	2	2	2	4	2	4	3	4	2	1	4	4	2	2	4	2	2	1	4	2	1	2	4	4	4	2	1
	40	1		4	2	4	2	1	4	4	1	2	3	2	2	4	2	2	4	2	1	2	2	4	3	4	2	2	3	4	2	4	4	2	2	4	4	1	1	2	4	2	4	1	2	4	4	2	2
	41	1		2	3	2	2	3	4	2	4	2	4	2	2	1	4	2	2	2	2	2	2	2	4	4	2	3	4	2	4	2	1	2	1	2	2	2	4	4	3	3	2	2	3	2	2	4	4
	42	1		1	2	2	2	2	2	4	4	2	2	3	2	4	2	2	2	4	4	4	1	2	2	2	4	3	1	4	2	2	4	4	4	4	3	2	2	4	1	2	4	2	4	4	1	2	1
	43	1		2	4	2	4	4	2	2	2	2	2	4	2	2	2	2	2	2	2	3	2	3	4	2	4	2	4	1	3	1	2	2	4	2	2	1	4	4	2	2	1	2	2	2	2	2	1
	44	1		4	2	1	2	2	2	2	1	2	2	4	2	2	2	2	2	2	3	2	1	2	3	4	4	3	4	4	1	2	4	2	4	4	4	2	4	2	1	2	4	2	2	3	2	4	2
	45	1		2	2	4	2	3	2	4	2	1	3	2	2	4	4	2	3	1	4	2	4	3	4	1	2	1	2	4	1	2	2	4	2	2	4	1	2	1	4	4	2	2	2	1	4	3	3
	46	1		2	2	4	3	3	4	3	2	2	1	2	1	2	4	2	4	2	4	2	1	3	3	1	1	4	2	2	4	2	2	1	4	2	2	1	4	2	4	2	2	1	1	4	2	2	2
	47	1		3	4	4	4	4	4	1	2	4	2	1	1	2	2	1	4	3	2	1	1	1	2	4	4	2	1	2	1	3	4	2	4	2	3	2	4	4	2	4	4	2	4	3	2	2	4
	48	1		4	2	2	4	4	4	2	2	4	4	2	1	2	2	4	1	2	2	4	2	4	2	4	4	2	4	2	2	4	4	2	4	1	1	4	2	2	4	2	4	2	2	1	2	3	2
	49	1		2	1	1	1	4	2	4	4	2	4	2	2	1	2	2	3	4	4	2	2	2	2	1	2	2	1	2	3	2	4	2	4	2	4	2	2	4	2	2	2	4	4	4	4	4	4
	50	1		4	4	1	1	4	2	2	2	4	4	4	2	4	4	2	2	2	2	4	2	2	2	4	2	2	2	2	4	4	2	4	4	2	2	2	2	1	1	4	1	2	4	2	4	2	4
	51	1		4	4	4	2	1	2	3	2	3	4	4	2	4	3	2	4	2	1	4	4	1	4	1	4	2	2	2	4	4	4	4	4	2	2	2	4	2	4	2	1	2	2	2	2	4	2
	52	1		4	1	1	2	4	1	2	1	4	2	4	4	4	4	2	4	2	2	2	1	2	1	4	2	4	4	3	3	2	1	4	2	1	2	2	2	2	2	4	2	2	2	2	1	1	2
	53	1		4	1	2	3	2	1	4	2	3	4	2	3	4	2	3	4	4	2	2	2	4	2	2	1	2	4	4	2	2	2	2	2	2	2	3	4	2	2	1	4	4	4	4	2	2	2
	54	1		1	4	4	4	4	2	2	2	2	3	1	2	2	4	2	2	2	2	1	2	1	2	2	4	2	2	2	2	4	2	4	2	2	2	4	2	2	1	2	4	4	1	2	2	3	4
	55	1		2	2	2	3	4	2	2	4	2	4	4	2	4	4	2	2	4	2	4	2	1	1	2	2	1	2	4	3	1	3	2	4	2	2	4	2	4	2	4	2	3	2	2	4	2	1
	56	1		3	1	2	2	4	2	2	4	2	4	2	2	2	4	1	2	4	2	2	4	2	1	2	4	4	2	3	4	2	2	2	2	4	3	2	1	1	2	2	2	3	2	1	1	4	4
	57	1		1	2	4	4	2	3	2	3	1	2	4	1	4	2	4	2	1	1	1	4	4	4	4	1	2	2	2	2	2	2	2	2	4	2	4	1	2	2	1	4	2	4	2	2	3	2
	58	1		4	2	4	2	2	1	4	4	1	2	2	4	2	2	4	4	2	2	1	2	2	1	1	2	2	4	1	2	2	2	2	2	2	3	1	4	4	2	2	1	2	2	2	3	2	2
	59	1		1	4	2	2	2	4	2	4	2	4	4	2	2	4	4	4	2	2	2	3	4	1	4	2	4	4	2	2	2	4	3	2	2	1	3	2	4	2	4	4	4	4	2	4	4	4
	60	2		2	2	1	2	4	1	4	4	2	4	2	1	2	2	1	3	4	1	4	2	1	2	4	1	1	4	2	2	1	4	2	2	1	4	2	3	1	4	1	2	4	4	4	4	2	2
	61	2		2	1	3	2	2	4	4	4	4	1	4	2	2	2	4	4	4	2	2	1	2	2	4	4	4	2	4	1	2	1	2	4	4	2	3	1	4	3	4	4	3	1	2	3	2	4
	62	2		1	2	4	2	2	2	1	4	2	2	1	2	4	2	4	4	4	3	1	4	4	2	2	4	4	4	3	4	1	4	4	1	4	2	4	2	4	1	2	2	2	2	2	4	2	4
	63	2		4	3	4	2	2	4	4	1	4	3	2	2	4	1	2	2	2	1	2	2	2	1	2	4	2	4	2	3	4	1	4	1	2	1	4	1	1	1	4	4	2	4	4	2	1	2
	64	2		3	2	1	2	2	1	2	2	1	4	1	2	3	2	4	2	4	2	1	1	2	3	2	4	1	4	2	1	2	3	4	2	2	2	2	2	2	2	4	3	2	3	3	1	4	4
	65	2		2	2	1	4	2	4	1	4	4	4	2	2	2	2	2	4	2	2	2	4	4	3	2	4	2	4	4	1	1	2	1	4	2	4	4	4	1	2	4	1	3	4	2	2	2	1
	66	2		4	3	2	4	2	2	4	2	4	4	2	2	3	2	1	2	4	4	4	1	1	4	2	1	2	3	2	2	2	3	2	4	2	1	2	2	1	2	2	4	2	2	3	4	4	1
	67	2		1	1	2	2	1	4	2	3	2	4	2	2	4	4	4	2	2	2	2	1	2	3	2	1	4	1	2	3	4	4	2	4	4	2	2	2	4	4	1	1	2	3	4	2	1	2
	68	2		2	1	2	4	3	1	1	2	3	2	4	2	2	3	2	4	2	3	2	2	1	2	4	2	2	2	2	4	2	2	2	3	1	4	3	4	1	4	2	4	2	1	4	2	2	2
	69	2		2	2	2	2	4	2	2	4	3	4	4	3	1	4	2	4	4	4	2	4	4	1	2	2	1	2	2	2	2	4	2	2	4	2	2	4	3	1	2	2	2	1	2	3	2	3
	70	2		2	4	2	3	2	4	2	4	1	3	2	4	4	1	2	4	4	2	2	3	4	1	2	4	4	4	1	3	4	2	4	2	1	1	2	2	4	2	2	4	4	4	2	2	1	4
	71	2		4	4	2	2	2	4	2	1	2	2	2	2	2	2	4	2	1	4	4	3	2	2	2	2	1	4	2	2	4	4	1	2	3	3	2	2	2	2	4	4	2	2	4	4	2	2
	72	2		2	2	4	4	4	2	2	1	4	2	4	4	2	2	2	2	3	1	4	4	4	3	2	4	1	2	2	4	2	2	1	2	1	2	3	2	2	2	2	1	2	2	4	4	2	2
	73	2		4	4	2	4	2	4	2	2	2	2	4	2	2	2	4	1	1	4	4	1	2	4	2	2	2	4	2	2	4	1	1	2	4	1	2	1	3	4	1	1	4	4	4	4	2	2
	74	2		2	3	2	2	4	1	2	2	2	2	1	1	3	3	4	4	4	4	4	4	4	2	1	4	1	1	2	2	4	1	2	4	2	4	3	2	2	4	3	3	2	2	2	4	2	2
	75	2		2	2	3	2	4	2	4	4	1	4	2	4	2	4	4	1	4	4	1	1	4	2	4	1	1	2	2	2	2	2	4	2	2	4	4	4	2	1	4	4	2	2	2	2	2	3
	76	2		4	2	2	2	4	4	2	1	1	2	2	2	4	3	4	1	1	4	4	1	2	4	2	2	4	4	2	4	2	3	2	4	2	2	1	2	2	4	4	2	2	3	2	4	2	1
	77	2		4	3	4	4	1	4	1	2	2	2	2	4	4	4	2	2	2	2	4	2	2	4	3	2	4	2	2	4	1	2	4	2	1	2	2	2	4	4	4	2	2	4	2	2	2	2
	78	2		2	2	4	1	4	2	4	4	4	2	4	3	2	2	2	2	2	3	1	1	2	2	1	2	1	2	4	4	2	2	4	1	1	4	2	4	3	2	4	2	2	2	4	2	1	1
	79	2		4	2	3	2	4	4	2	1	2	1	4	4	4	1	2	2	1	3	3	2	2	2	2	2	3	2	2	2	4	2	1	4	2	4	4	1	2	1	2	2	4	1	4	2	2	2
	80	2		1	2	2	2	2	1	2	2	2	4	2	3	4	3	2	4	1	2	2	4	2	2	1	2	2	2	2	1	2	2	1	4	4	2	4	2	1	2	2	2	1	4	1	2	1	1
	81	2		2	2	2	2	2	2	4	1	2	1	4	3	3	2	4	2	2	4	1	2	2	2	2	1	3	2	4	4	2	4	3	1	1	4	4	4	1	2	4	4	4	2	4	4	1	4
	82	2		1	4	2	2	4	4	4	3	4	1	2	4	4	2	1	2	4	2	4	4	4	4	2	2	1	3	1	2	4	4	4	2	2	2	4	2	3	1	1	2	2	2	4	2	4	3
	83	2		2	2	4	4	1	4	2	3	1	4	4	1	1	2	2	3	4	4	3	4	4	4	2	2	3	2	4	2	1	4	4	2	4	3	2	2	4	1	4	3	2	1	1	2	2	2
	84	2		2	1	2	2	2	4	2	2	4	4	4	1	2	4	2	2	4	4	2	4	1	2	4	2	2	2	2	2	2	2	1	4	2	4	4	3	1	2	4	4	4	2	2	2	4	2
	85	2		2	2	4	2	4	2	4	4	2	4	2	2	1	2	4	2	4	1	2	2	2	2	4	1	2	4	2	2	4	2	2	4	4	2	2	1	4	4	2	4	2	4	3	1	4	2
	86	2		2	1	2	1	2	2	4	2	4	3	4	4	4	4	4	2	4	4	4	2	4	1	4	3	4	4	1	2	2	2	4	2	4	2	4	1	2	2	4	1	2	3	2	1	4	2
	87	2		2	1	4	4	4	2	2	2	2	3	4	4	4	2	2	2	2	2	1	4	2	2	2	4	4	4	2	2	4	1	2	4	2	2	4	1	1	3	2	3	2	1	2	2	2	2
	88	2		4	2	4	2	1	4	2	2	1	3	2	2	4	1	3	4	1	2	4	4	2	1	3	2	4	2	1	1	2	4	3	1	2	1	4	4	2	4	4	4	1	2	1	1	4	2
	89	2		2	4	2	2	1	2	2	4	4	2	2	3	2	1	1	4	2	2	2	2	2	2	4	1	2	2	2	2	2	2	4	3	1	2	2	2	1	4	4	2	2	2	4	4	2	2
	90	2		2	2	1	2	4	4	1	2	1	2	2	4	4	4	4	1	2	4	4	2	2	4	2	2	2	4	2	1	4	2	2	4	2	4	4	4	4	1	2	2	2	2	4	2	2	2
	91	2		4	1	4	4	1	2	2	1	3	4	2	1	2	1	2	2	2	2	2	4	2	4	2	1	2	4	2	2	1	4	4	2	4	2	3	4	2	2	2	2	2	2	2	4	1	2
	92	2		4	3	4	2	4	2	2	3	1	3	2	2	4	4	2	1	2	1	4	2	2	2	3	4	4	2	1	4	2	2	2	2	1	4	4	2	2	2	2	4	2	4	3	4	2	4
	93	2		2	2	3	4	2	4	4	2	4	4	2	2	2	2	2	2	2	4	4	2	2	4	2	2	2	2	4	2	2	1	2	1	2	4	1	2	2	2	3	4	2	3	4	2	1	2
	94	2		1	1	4	2	2	2	1	2	2	1	4	2	2	3	4	1	2	3	2	4	1	2	4	4	1	2	4	2	2	2	2	3	4	4	4	4	2	2	4	2	2	1	2	4	2	4
	95	2		4	2	2	1	4	4	4	1	2	2	4	2	2	2	2	2	2	4	2	4	4	1	2	2	2	3	2	4	4	2	2	4	4	1	4	2	2	2	2	1	4	2	1	1	1	2
	96	2		2	4	3	1	4	2	2	1	4	2	2	1	1	4	2	2	4	2	4	4	3	4	4	2	2	2	4	2	4	2	4	4	4	3	4	4	2	2	2	4	3	2	2	2	2	4
	97	2		2	1	2	4	2	4	4	2	3	4	2	2	2	2	1	2	1	2	2	3	1	2	2	2	3	4	4	2	2	2	2	4	2	4	1	1	2	1	2	2	4	2	4	4	1	1
	98	2		2	4	2	2	2	1	4	2	2	2	2	4	2	4	2	2	4	2	1	2	1	4	4	2	2	2	2	2	2	2	4	4	1	4	4	2	2	4	4	2	2	2	2	2	1	2
	99	2		2	3	2	2	2	4	2	1	4	4	1	2	2	2	2	4	2	4	1	2	4	2	4	4	4	2	2	4	2	4	2	2	1	4	4	1	2	2	2	2	2	3	2	2	4	1
	100	2		1	1	4	2	3	2	2	4	2	2	4	2	2	1	1	2	2	4	1	4	2	2	3	1	1	2	2	2	2	2	1	1	4	2	3	2	3	4	2	2	4	1	2	1	2	4
	101	2		2	4	4	4	2	4	4	2	2	2	2	4	4	4	2	4	4	4	4	2	1	4	2	4	4	1	1	2	1	2	3	2	4	1	4	2	3	3	2	4	2	4	2	2	1	2
	102	2		2	4	2	2	1	2	4	4	2	2	2	2	2	2	2	2	4	3	4	4	2	2	2	2	4	2	1	4	3	4	2	4	3	4	1	3	4	2	3	3	2	2	1	3	1	2
	103	2		1	4	3	4	2	2	2	1	2	2	3	2	4	2	4	2	2	2	4	2	2	3	2	4	2	4	2	4	4	4	2	3	2	4	2	2	2	2	1	2	3	1	2	2	2	2
	104	2		4	2	2	2	2	2	2	2	4	2	4	2	4	2	2	2	2	2	4	4	4	2	4	4	2	2	2	2	2	1	2	4	2	2	2	1	2	3	2	2	1	2	4	2	2	1
	105	2		4	4	2	2	2	2	1	4	1	4	1	2	3	1	4	2	3	2	4	2	3	2	4	2	2	2	2	1	2	1	1	2	4	2	4	2	4	4	2	4	4	2	4	2	1	2
	106	2		1	4	2	1	4	4	2	4	2	4	2	2	4	2	4	4	2	2	1	2	4	4	4	1	4	2	1	2	4	1	1	2	2	1	1	2	4	4	2	2	2	4	2	2	1	2
	107	2		4	2	4	3	4	4	2	4	4	2	2	2	2	4	2	2	4	3	1	1	3	4	2	4	4	2	4	4	4	4	4	1	4	1	2	2	2	2	1	2	1	3	4	4	4	4
	108	2		4	4	2	1	4	2	2	4	1	4	4	4	2	2	4	4	2	2	2	4	2	2	2	4	3	1	4	3	2	2	2	2	2	2	2	4	1	2	4	2	4	3	4	1	4	2
	109	2		4	2	1	4	2	1	2	4	4	2	2	2	2	4	4	3	3	2	2	2	2	2	4	4	4	2	3	4	2	4	4	4	4	4	4	2	2	2	4	2	2	1	4	4	2	2
	110	2		4	2	4	4	2	4	2	2	1	2	2	4	2	1	2	2	1	2	2	4	4	2	4	2	2	2	1	1	2	2	2	4	3	4	1	4	2	2	4	2	4	2	3	2	2	4
	111	2		2	1	4	4	4	2	2	1	2	2	3	4	2	2	2	2	4	2	1	2	2	4	2	2	1	2	2	2	1	4	2	4	4	2	2	2	4	2	4	1	2	1	2	2	2	2
	112	2		2	2	2	2	2	3	1	2	3	2	4	2	4	3	4	4	2	1	4	2	4	2	1	2	4	2	4	4	2	2	4	4	3	4	1	2	2	2	3	4	4	2	2	4	2	1
	113	2		2	2	3	4	2	2	4	2	2	1	4	2	2	3	2	4	2	1	2	2	4	2	4	2	1	2	4	2	2	4	3	2	2	2	2	2	4	2	2	3	2	2	4	2	4	1
	114	2		3	2	4	2	2	1	2	2	4	2	3	2	3	2	3	2	2	4	4	4	2	4	2	4	4	1	4	2	2	4	4	4	2	2	1	2	2	4	2	2	4	1	4	4	4	2
	115	2		2	3	3	1	2	2	2	1	2	2	1	2	2	1	4	1	4	3	2	2	2	2	1	2	4	4	4	1	4	4	4	1	4	3	4	2	2	1	2	1	4	1	2	4	2	4
	116	2		2	2	2	4	1	4	4	2	1	4	4	2	2	4	2	2	1	3	2	3	2	2	1	2	3	1	2	2	3	2	2	2	4	3	2	2	2	1	2	4	2	2	2	2	2	2
	117	2		2	4	2	2	2	2	2	2	4	2	4	1	4	2	4	1	4	2	2	2	2	2	4	4	2	1	2	4	2	2	2	2	1	2	2	2	4	2	2	2	3	4	2	4	2	2
	118	2		3	3	1	4	2	1	2	2	2	4	4	1	1	1	2	4	3	2	2	2	2	2	2	2	4	1	1	4	4	4	1	1	4	3	1	2	2	1	2	1	2	4	4	2	4	2
	119	2		1	2	1	2	2	3	2	2	2	1	4	2	2	1	4	4	2	4	1	2	1	2	2	1	4	4	2	2	4	2	4	2	2	2	4	2	2	4	2	4	2	2	2	1	4	2
	120	2		4	2	2	2	2	2	4	1	2	2	2	2	2	2	4	2	4	2	2	2	2	4	3	1	1	3	4	2	4	2	2	4	2	4	2	4	4	2	2	4	2	3	2	2	2	2
	121	2		2	4	4	2	1	2	4	4	1	2	2	1	2	2	2	2	4	2	2	2	4	2	4	4	2	1	4	1	2	4	4	4	2	2	2	2	4	4	3	2	2	4	1	2	4	4
	122	2		2	2	1	1	4	4	4	1	2	2	4	4	1	2	1	4	4	2	1	2	2	4	1	4	2	3	2	2	2	4	4	4	4	2	2	4	2	1	4	2	1	4	1	2	1	4
	123	2		1	1	2	2	2	1	1	3	3	1	4	2	3	4	2	2	2	4	2	4	4	2	2	4	2	1	2	2	2	2	4	4	2	4	2	2	2	2	4	2	2	1	2	4	2	4
	124	2		2	4	2	4	1	2	2	4	2	3	2	2	2	2	4	4	2	2	4	4	4	2	4	2	2	4	3	4	2	4	4	2	3	2	2	1	2	4	3	1	4	3	4	2	2	2
	125	2		3	2	2	4	2	1	2	4	2	1	4	4	4	4	2	4	4	2	2	1	2	4	2	2	4	3	3	2	4	2	4	2	2	1	4	3	4	2	3	2	2	2	1	4	3	1
	126	2		3	2	2	2	2	4	4	2	2	2	1	2	4	1	3	2	4	4	4	4	3	1	3	2	2	4	2	2	4	3	2	3	2	2	4	1	2	1	4	2	1	4	4	2	2	4
	127	2		2	1	1	2	4	2	2	1	2	1	3	4	2	2	2	2	2	4	4	4	4	3	1	3	1	1	2	2	1	2	1	4	2	4	2	1	2	4	2	1	4	2	4	2	2	1
	128	2		2	4	4	3	4	2	4	2	3	2	4	2	2	2	3	1	4	2	4	2	2	4	2	2	1	1	2	2	2	1	2	2	4	1	1	4	2	1	2	1	2	4	2	2	2	2
	129	2		4	2	2	2	2	2	1	4	4	2	2	4	1	2	3	1	4	4	2	2	3	2	3	2	4	2	2	4	2	2	2	4	2	2	4	2	3	2	4	4	4	2	2	2	2	1
	130	2		4	1	2	4	2	4	2	2	4	1	2	1	4	2	2	2	2	4	2	4	4	2	4	4	4	2	4	4	1	2	2	2	4	4	1	1	4	2	4	2	2	2	2	3	4	4
	131	2		4	2	4	2	1	2	4	2	2	4	1	2	2	2	2	3	3	2	2	2	4	1	4	2	4	4	4	2	2	2	2	4	2	4	4	2	2	2	2	4	2	3	1	4	2	2
	132	2		2	2	4	2	4	2	4	2	1	2	2	1	1	2	1	2	2	4	4	2	4	4	3	2	4	2	1	4	2	1	4	2	2	1	4	4	4	4	4	2	4	2	4	1	2	2
	133	2		2	2	2	4	4	4	2	2	1	1	4	1	4	4	4	2	2	1	1	4	2	2	2	4	1	4	2	2	2	4	2	4	3	2	2	4	4	2	3	4	2	1	1	1	2	4
	134	2		2	2	4	4	4	2	1	3	4	2	2	1	3	4	4	2	2	4	2	2	2	4	1	2	4	4	1	1	4	4	2	1	2	2	3	1	2	1	3	4	4	1	2	2	4	4
	135	2		4	2	2	1	3	2	1	4	2	2	4	4	2	4	2	2	2	3	2	4	1	3	1	2	2	2	1	2	2	4	2	3	1	4	1	2	4	1	4	2	2	4	4	2	4	1
	136	2		2	2	4	1	4	4	4	1	2	2	2	1	2	1	2	2	4	1	4	3	4	2	4	2	1	2	2	1	2	2	4	4	2	1	4	2	1	2	2	1	4	2	2	1	2	2
	137	2		2	4	2	1	2	2	4	2	4	4	4	2	2	1	3	4	4	2	2	2	4	4	4	4	2	4	2	4	2	2	4	4	2	2	4	2	2	1	2	4	4	2	3	2	2	2
	138	2		1	1	2	2	4	2	4	2	2	4	2	2	2	4	2	2	2	4	2	2	2	2	1	2	2	2	4	4	3	2	2	4	4	2	4	2	4	2	4	2	4	4	2	2	4	2
	139	2		2	2	2	3	4	2	1	2	1	1	2	2	1	1	4	4	3	2	4	2	4	4	4	1	4	1	2	4	3	2	4	2	2	2	2	2	2	2	4	2	3	3	2	4	2	1
	140	2		3	4	1	2	1	2	3	2	2	4	1	2	2	1	1	4	1	4	3	2	1	2	2	4	2	1	4	4	4	2	2	2	4	3	4	4	1	2	4	2	2	2	1	4	4	2
	141	2		4	1	4	2	2	2	2	4	2	1	2	2	1	2	3	1	4	2	3	1	2	2	2	2	2	4	4	4	2	4	4	1	4	4	1	4	4	2	1	2	2	4	2	2	4	1
	142	2		2	4	2	2	3	4	4	1	1	2	1	2	1	2	2	1	3	1	1	4	4	1	2	2	2	1	4	1	2	4	2	2	2	4	4	4	3	4	2	4	3	4	1	2	2	2
	143	2		2	4	4	2	1	2	2	4	1	2	4	3	4	2	2	4	2	2	1	4	4	2	2	2	4	4	2	2	4	4	2	2	2	4	4	2	4	2	2	4	2	4	4	2	2	4
	144	2		3	2	1	2	2	4	2	1	2	2	2	1	2	1	4	2	4	4	4	2	2	2	4	4	4	2	2	4	2	2	2	2	1	2	2	2	2	2	2	2	4	2	2	2	1	2
	145	2		4	3	4	2	2	3	2	4	4	2	4	2	2	2	2	2	4	1	3	2	2	4	4	2	4	4	2	2	2	2	2	2	4	4	2	4	1	1	3	1	1	2	1	2	3	2
	146	2		1	2	3	4	2	2	1	4	1	4	4	1	2	4	1	2	1	2	4	4	2	4	2	4	2	1	4	2	4	1	3	2	4	4	4	3	1	2	2	1	4	1	2	2	4	2
	147	2		4	2	2	2	2	2	1	2	2	4	2	2	4	4	2	4	3	4	4	1	4	4	2	3	1	2	2	2	4	2	3	2	3	1	4	2	1	2	4	2	2	2	4	4	2	1
	148	2		2	2	4	4	2	3	2	2	3	2	4	2	1	3	2	2	2	4	4	2	2	3	4	1	4	2	2	4	3	4	2	1	4	2	2	2	4	2	2	4	4	2	4	2	2	4
	149	2		2	2	2	1	2	2	2	1	1	2	1	1	4	4	2	4	2	2	2	2	2	2	1	3	2	3	4	2	2	4	2	4	2	4	2	1	2	4	2	2	4	2	2	1	4	4
	150	2		2	2	3	2	2	4	1	4	2	3	3	2	2	4	2	4	2	4	4	3	4	4	4	4	2	2	2	3	2	2	4	2	2	4	2	2	3	4	2	1	3	2	4	4	2	2
	151	2		1	4	2	2	4	3	4	1	1	4	2	3	2	4	4	4	2	1	2	2	4	2	2	4	2	2	4	2	4	4	1	2	4	2	4	1	3	2	2	4	4	3	3	4	4	2
	152	2		2	2	4	4	2	2	2	2	1	4	2	4	2	4	4	4	2	4	4	2	3	1	2	3	2	1	1	2	2	2	3	2	2	3	4	2	2	2	2	1	2	4	2	2	2	2
	153	2		3	1	4	3	2	3	4	4	2	4	4	2	1	1	2	1	2	2	4	4	4	4	4	2	2	2	4	4	3	2	4	4	2	2	4	1	2	2	4	4	4	2	3	3	3	2
	154	2		2	1	4	4	2	4	1	4	4	3	1	2	1	3	2	4	2	4	4	2	2	2	2	3	4	4	4	1	1	4	4	2	2	2	4	2	2	4	2	2	4	2	2	2	3	1
	155	2		2	4	4	1	4	1	2	2	2	2	4	4	2	4	2	2	2	2	4	4	3	4	4	1	4	4	2	2	3	4	2	4	2	3	2	2	4	2	2	4	2	2	2	2	1	1
	156	2		1	2	2	2	2	2	1	4	2	2	1	2	4	2	4	2	3	4	4	4	2	3	1	4	3	1	2	1	2	3	3	1	1	4	2	3	1	2	1	2	2	1	1	4	2	4
	157	2		1	2	2	2	1	2	2	1	2	4	3	2	4	4	1	2	2	4	4	4	3	2	4	1	4	4	1	2	4	3	1	2	2	4	2	2	1	4	2	1	2	4	4	1	3	2
	158	2		4	1	2	2	2	2	1	2	1	4	3	1	2	4	2	4	2	2	2	2	2	2	1	1	1	2	4	2	2	1	4	2	2	4	4	4	2	2	4	2	4	4	4	1	1	1
	159	2		1	2	4	4	2	2	1	4	4	4	4	4	2	2	4	2	2	1	4	2	1	2	1	2	2	4	4	2	4	4	2	2	3	2	4	1	4	2	2	2	2	4	4	2	2	2
	160	2		2	1	1	4	1	2	1	4	2	1	4	2	4	2	4	2	4	2	1	2	4	4	2	2	2	1	1	3	2	4	1	2	4	2	2	1	2	4	3	4	1	1	2	4	2	4
	161	2		2	2	4	1	1	2	2	4	1	3	4	4	4	1	2	4	4	2	2	4	2	2	4	2	3	2	2	4	4	2	4	3	4	2	2	2	2	2	2	2	2	3	4	2	4	2
	162	2		4	2	2	1	2	2	4	2	1	1	1	4	1	2	4	2	4	2	2	2	4	2	2	2	4	4	3	4	1	1	1	3	2	1	4	4	3	4	2	2	2	4	4	2	3	1
	163	2		2	4	4	4	2	1	4	2	1	2	2	2	2	4	1	1	4	4	2	2	2	2	4	2	2	4	2	1	4	2	2	2	2	2	2	2	2	2	4	4	2	4	2	2	2	2
	164	2		2	1	4	1	4	4	1	2	2	4	2	2	2	4	4	4	4	2	2	2	3	1	4	2	2	1	1	4	4	2	2	4	2	2	4	4	2	1	2	4	2	3	2	2	1	4
	165	2		1	2	2	3	2	1	2	3	4	2	2	2	4	2	1	2	4	2	1	1	3	2	2	4	4	4	2	4	2	4	2	3	1	4	2	2	1	2	4	2	1	4	2	1	4	1
	166	2		2	2	2	1	4	4	2	4	2	4	1	2	2	2	1	4	2	4	4	2	4	2	1	2	2	4	4	4	1	4	2	2	4	2	2	4	4	2	4	1	1	2	3	3	2	4
	167	2		3	2	4	2	4	2	2	2	4	2	2	4	2	4	2	4	2	4	2	4	2	2	4	4	2	2	1	4	2	2	4	4	3	2	2	1	4	3	2	4	4	4	2	2	4	4
	168	2		3	2	2	2	2	2	4	4	2	2	4	4	2	2	1	2	4	2	3	2	4	4	2	2	2	1	1	4	4	2	2	2	4	2	3	2	2	1	4	2	3	2	1	2	4	2
	169	2		1	4	1	2	4	2	1	1	2	2	4	2	1	2	2	4	2	4	2	1	2	4	4	4	2	2	4	2	1	4	2	2	1	1	4	4	2	1	2	2	2	1	4	2	1	3
	170	2		2	2	2	4	2	2	3	4	2	2	2	1	4	2	2	4	2	4	1	4	3	4	2	2	2	4	4	3	2	4	1	4	1	4	4	2	2	4	2	1	4	4	4	1	4	4
	171	2		4	2	2	2	1	4	4	2	2	2	4	2	2	2	3	4	3	2	2	4	2	2	2	2	2	3	1	2	4	3	2	2	4	2	1	3	4	4	2	2	2	4	2	2	1	2
	172	2		2	2	1	2	2	2	1	1	2	2	4	2	1	2	4	2	2	2	2	2	2	2	4	1	2	4	2	2	2	2	4	4	2	4	3	2	2	2	4	2	4	4	4	2	2	2
	173	2		2	1	2	2	2	2	2	2	4	2	4	1	2	4	2	2	3	4	4	4	2	2	1	3	4	2	2	2	4	4	4	4	2	2	4	2	2	2	2	2	4	2	2	4	4	4
	174	2		2	2	4	1	4	4	2	2	3	4	2	2	4	4	4	2	2	4	4	2	3	1	2	1	1	2	3	2	3	4	3	2	2	1	2	4	2	4	2	2	2	2	4	4	2	1
	175	2		2	3	4	2	2	4	1	2	2	4	2	1	2	2	1	2	2	3	2	1	2	2	3	2	4	1	2	4	2	1	3	4	2	4	1	3	1	2	2	4	2	4	2	2	1	2
	176	2		4	2	1	2	2	2	1	2	3	1	3	1	2	1	4	4	4	4	2	1	4	2	2	1	1	3	1	2	2	1	2	2	2	2	4	4	2	3	1	2	2	2	2	4	2	4
	177	2		1	2	4	2	1	3	4	4	4	4	1	2	2	2	1	2	4	4	2	1	4	2	2	2	1	4	4	2	4	1	2	4	1	2	1	2	4	4	2	2	2	2	2	2	2	1
	178	2		1	3	2	2	2	4	1	1	4	1	3	4	1	1	1	4	2	4	2	2	2	2	2	4	2	2	2	4	4	2	4	2	3	2	3	4	2	4	1	4	1	4	1	1	1	1
	179	2		2	2	2	4	2	2	2	1	1	2	2	2	2	1	4	2	2	4	2	2	2	3	2	4	3	2	2	1	4	2	2	2	1	2	3	2	3	2	4	2	2	2	4	2	4	2
	180	2		3	4	3	4	2	2	1	2	2	1	4	4	2	2	4	2	2	3	4	2	4	4	2	2	2	2	2	2	1	3	4	4	4	1	2	2	4	2	3	1	2	2	3	4	1	4
	181	2		2	2	2	1	2	2	2	4	2	4	2	4	4	4	2	1	2	2	4	3	1	2	1	2	2	2	2	1	1	2	2	4	4	3	2	4	2	2	2	1	2	2	2	4	3	2
	182	2		2	1	2	2	2	3	1	2	4	4	2	1	2	2	4	2	4	2	2	2	4	4	2	2	3	1	2	4	4	2	4	1	4	2	4	2	4	4	2	4	4	1	2	4	2	2
	183	2		2	3	4	2	2	2	2	2	4	2	4	3	2	1	4	2	2	4	4	4	2	3	4	2	2	1	4	4	4	3	4	2	2	2	2	2	3	2	3	4	1	3	2	2	2	3
	184	2		2	1	4	2	4	3	2	1	2	2	4	2	1	1	2	1	2	2	3	4	3	2	4	2	4	2	2	2	2	1	1	4	2	1	2	4	4	3	1	4	4	3	1	4	2	2
	185	2		4	4	4	2	2	2	4	4	4	2	3	2	4	2	2	2	1	2	4	2	2	4	1	4	1	2	4	1	3	2	2	4	1	1	4	2	2	2	4	4	2	4	4	4	1	2
	186	2		4	2	1	2	4	1	2	3	2	4	2	1	4	2	2	2	4	4	1	4	4	4	4	1	2	3	4	2	4	2	4	2	1	4	2	4	4	2	1	1	2	4	2	4	1	4
	187	2		4	4	2	2	4	3	1	4	4	4	4	4	2	2	4	2	2	4	2	1	2	2	1	2	1	4	1	1	2	2	4	4	4	2	4	2	2	3	2	2	2	2	4	2	2	2
	188	2		4	2	2	2	2	1	2	2	2	1	1	4	2	4	2	2	2	1	2	4	2	4	2	2	2	4	4	2	2	4	4	2	1	3	2	2	2	2	4	4	1	2	4	2	4	2
	189	2		2	4	4	4	4	2	2	2	1	2	2	2	4	3	2	2	2	4	2	4	2	4	4	2	2	2	2	2	2	4	2	4	2	1	4	1	4	2	4	2	2	2	1	4	2	2
	190	2		2	2	2	3	1	4	1	4	3	4	4	2	1	4	4	1	3	4	1	4	2	4	3	4	2	4	4	4	4	4	4	4	3	2	4	2	2	2	2	2	2	2	2	4	2	1
	191	2		2	1	4	2	4	1	1	3	2	4	2	3	1	2	2	1	2	4	3	4	4	4	4	4	2	2	1	4	2	3	3	2	2	4	4	4	4	4	2	2	2	1	4	4	2	4
	192	2		2	1	4	2	1	2	4	2	4	3	2	4	2	4	2	2	1	2	1	4	2	2	1	1	4	4	4	4	2	2	4	2	4	1	1	1	2	2	2	4	4	4	2	2	1	4
	193	2		1	1	3	2	2	4	2	3	1	2	2	2	2	2	2	4	3	1	4	2	2	4	2	4	1	4	2	2	2	1	2	1	2	2	2	4	2	4	1	3	2	4	2	4	1	1
	194	2		2	4	4	1	2	4	4	4	2	2	2	2	2	2	2	4	2	1	2	2	2	2	2	2	2	1	4	2	2	4	1	1	2	2	2	1	4	4	1	2	2	2	4	1	4	2
	195	2		4	2	3	4	2	2	4	3	2	2	2	2	4	2	2	1	2	3	2	2	2	2	4	2	2	4	2	1	2	2	2	2	4	4	3	4	3	3	1	4	1	2	4	3	3	1
	196	2		2	2	4	2	4	4	2	4	3	4	3	2	4	4	3	4	4	1	2	1	2	2	4	2	2	4	3	4	4	1	1	2	2	2	4	4	2	4	2	2	2	4	4	2	4	4
	197	2		2	1	4	4	4	4	1	2	1	1	4	1	2	1	2	2	2	4	3	4	1	2	4	4	2	4	2	3	1	4	4	2	1	4	2	2	1	1	2	2	4	1	2	1	4	4
	198	2		2	4	4	2	2	2	2	2	3	2	1	2	2	1	2	2	2	4	4	2	4	2	1	2	2	1	1	4	2	2	1	4	4	1	2	2	1	2	2	4	4	2	2	2	1	4
	199	2		2	4	4	4	2	2	4	4	1	1	2	2	2	3	1	4	1	4	4	1	1	2	4	2	2	4	4	2	1	4	4	4	2	3	2	3	3	3	1	2	2	2	2	1	3	2
	200	2		4	2	2	2	4	2	2	3	3	1	4	4	4	4	3	2	4	2	1	1	3	2	4	1	1	2	1	2	2	2	2	3	2	4	2	4	2	2	4	2	4	2	2	2	2	1
	201	2		2	4	4	4	2	4	2	4	1	4	2	2	2	4	3	4	4	2	4	4	2	2	4	2	2	2	4	2	4	2	2	2	1	3	2	1	2	2	2	1	1	2	2	1	2	2
	202	2		4	2	2	4	2	4	2	2	2	3	3	3	4	2	2	3	2	4	4	1	2	2	1	4	4	2	1	4	2	2	4	1	2	4	2	2	2	4	2	2	2	2	1	2	4	1
	203	2		1	2	2	4	2	2	1	2	2	1	2	4	2	2	2	1	1	4	1	1	2	1	4	2	2	2	4	4	2	2	3	3	1	2	2	2	2	2	1	2	1	1	1	2	2	4
	204	2		4	2	4	2	4	4	2	2	4	2	2	4	1	2	4	2	4	4	2	2	4	1	1	4	4	2	3	2	4	4	2	2	2	1	2	2	3	2	2	4	2	1	2	2	2	1
	205	2		2	2	2	2	2	4	1	2	2	2	1	2	2	2	4	1	4	4	1	4	1	4	2	4	1	2	2	4	2	1	2	4	2	4	4	2	3	1	2	4	3	2	2	1	2	1
	206	2		1	1	3	4	2	2	2	4	2	4	2	4	2	4	2	2	1	2	1	4	4	4	2	2	2	2	4	2	4	2	4	2	1	1	2	2	2	2	2	4	2	2	4	2	3	2
	207	2		4	4	4	1	1	2	2	2	2	4	4	2	2	4	2	4	3	1	2	4	2	1	4	3	2	1	2	1	4	2	2	2	2	3	2	4	4	2	2	1	4	2	2	2	2	2
	208	2		2	2	4	2	4	4	3	2	4	1	2	1	1	4	2	4	4	1	1	4	2	2	2	4	1	4	3	2	4	4	4	4	2	1	2	2	2	2	2	2	2	2	2	2	2	4
	209	2		4	4	4	2	2	3	2	2	2	1	4	2	4	2	2	4	1	1	2	2	1	1	2	1	4	2	1	4	1	3	2	2	2	2	1	4	2	2	2	4	4	2	1	4	2	2
	210	2		2	2	2	2	1	2	4	2	2	4	1	2	3	2	2	4	1	2	3	2	2	2	1	2	2	4	1	4	2	2	1	2	2	4	4	1	2	3	2	1	1	2	1	2	4	2
	211	2		4	1	2	2	2	4	2	2	4	4	2	4	2	4	2	4	2	2	2	2	2	4	2	2	3	4	4	1	2	4	4	2	2	3	2	2	1	2	2	4	2	4	2	1	2	2
	212	2		4	2	2	4	1	4	2	4	4	2	4	1	2	2	2	2	4	4	1	4	4	3	2	4	1	2	4	2	1	4	2	2	2	2	4	1	2	2	1	4	2	2	2	1	2	2
	213	2		4	4	4	2	4	4	2	4	2	2	2	1	1	1	2	2	1	4	2	1	2	4	2	1	2	4	2	2	1	2	2	4	2	4	4	2	1	4	4	3	2	2	4	1	2	1
	214	2		1	4	2	2	2	2	4	4	4	2	1	4	1	2	3	1	2	2	2	4	2	2	2	2	2	2	4	2	4	4	4	3	4	2	4	4	4	2	2	4	1	2	4	4	3	2
	215	2		2	2	2	4	4	2	4	4	4	3	2	2	2	4	2	4	2	2	3	4	4	2	2	2	4	4	2	4	2	2	4	2	4	2	2	4	2	2	2	2	2	4	2	1	4	2
	216	2		4	2	1	2	2	2	3	1	2	1	4	1	4	2	4	2	2	2	2	1	2	2	4	2	2	4	2	4	2	2	2	3	4	2	1	2	1	3	2	1	1	2	4	1	2	2
	217	2		2	1	1	2	4	2	2	3	2	2	2	2	4	3	4	4	2	4	4	2	2	4	2	2	4	2	2	2	1	2	4	1	2	2	2	2	4	4	2	4	4	2	4	2	4	2
	218	2		3	2	2	1	3	4	1	4	4	2	2	4	2	1	2	4	2	2	2	4	2	2	2	3	3	4	4	1	2	2	4	2	2	4	4	2	2	4	4	2	2	4	1	4	4	2
	219	2		2	2	2	1	2	2	1	2	2	1	2	4	2	1	1	2	2	4	4	2	2	2	1	2	3	2	2	4	2	2	4	1	2	1	2	2	4	4	2	4	4	4	1	4	2	2
	220	2		4	2	3	2	1	4	1	2	1	2	1	2	2	2	4	2	4	1	2	4	3	2	3	2	1	4	2	2	2	2	2	2	4	2	1	3	4	1	1	2	1	2	2	4	2	2
	221	2		2	3	1	4	2	1	4	2	2	2	2	4	2	4	2	1	3	2	2	2	2	2	2	4	3	4	2	2	2	2	2	1	1	2	2	2	4	3	4	4	2	4	4	2	4	1
	222	2		2	1	2	2	2	2	2	4	4	1	2	1	2	2	1	4	4	1	4	2	1	2	2	2	4	4	2	2	2	1	2	2	3	4	2	2	2	4	2	2	4	4	2	3	2	2
	223	2		2	1	1	2	2	4	4	2	1	2	2	4	2	2	4	2	4	3	2	4	2	4	4	4	3	4	4	4	2	4	1	1	2	2	4	4	4	4	4	2	4	4	2	4	4	4
	224	2		2	4	3	2	2	1	2	2	2	1	4	2	4	2	4	1	1	2	4	2	2	4	2	2	4	4	2	4	2	4	2	4	2	2	3	2	4	2	4	4	2	1	4	4	2	2
	225	2		2	4	2	3	1	1	1	2	1	1	1	1	1	4	4	4	1	4	2	2	4	4	4	4	1	1	4	1	2	1	4	2	2	2	4	2	2	1	2	2	4	4	1	4	2	2
	226	2		2	4	2	2	2	2	4	2	4	4	1	2	2	2	2	2	2	1	3	1	2	1	4	2	2	2	4	4	4	4	1	2	1	4	2	2	4	4	2	4	2	2	1	2	1	1
	227	2		1	2	2	1	2	1	2	2	3	4	3	4	2	2	2	4	4	2	1	4	1	2	4	4	2	2	2	2	2	1	2	2	2	4	2	2	4	4	2	1	2	2	4	1	1	2
	228	2		3	2	2	4	2	2	2	4	2	1	1	4	2	4	1	2	2	2	2	4	2	2	1	4	2	3	4	2	1	2	2	1	4	4	1	2	2	2	2	2	4	2	4	2	2	1
	229	2		1	3	2	4	4	2	3	2	3	4	3	4	2	1	4	2	3	1	4	2	4	2	2	4	1	2	4	2	2	3	2	2	3	2	4	4	2	1	2	4	4	1	2	1	2	4
	230	3		3	2	1	2	2	1	2	2	2	4	2	2	2	1	4	2	2	2	2	4	2	3	3	4	4	4	2	3	1	4	2	2	2	4	2	2	1	4	1	2	3	4	1	2	2	4
	231	3		2	1	2	3	4	4	2	3	2	1	2	4	2	1	2	2	2	4	4	2	2	3	4	2	4	2	1	4	1	1	2	2	2	4	4	2	1	4	4	3	2	4	4	2	4	1
	232	3		2	2	1	2	2	1	2	1	2	4	4	2	2	2	2	4	2	2	2	1	2	2	3	2	2	4	2	2	2	2	1	1	2	1	2	4	2	2	1	2	3	2	1	4	2	2
	233	3		4	2	4	2	2	4	2	4	4	4	1	4	3	2	1	4	2	3	2	1	2	2	2	4	2	2	1	1	2	1	4	2	1	2	1	2	4	2	4	4	1	1	2	1	4	2
	234	3		4	4	2	4	1	4	2	2	2	2	2	1	4	2	3	4	2	4	2	2	4	1	4	2	4	4	4	4	4	2	4	4	4	4	2	2	3	2	2	4	3	2	4	3	4	2
	235	3		4	2	4	4	1	2	1	3	4	2	4	4	4	2	1	4	3	2	2	2	3	4	1	2	1	2	4	2	1	1	4	2	4	2	2	2	2	2	1	3	1	2	2	2	4	4
	236	3		2	2	2	2	4	4	2	4	2	4	2	4	2	4	4	4	4	1	4	2	4	2	4	2	2	2	4	4	4	2	2	2	2	2	3	2	4	4	4	3	2	4	1	2	4	2
	237	3		3	2	4	1	4	2	2	2	1	3	4	2	2	4	2	4	1	1	4	4	4	4	1	4	4	2	1	4	2	2	2	4	4	3	2	4	1	3	4	3	2	4	2	1	4	2
	238	3		2	4	4	2	1	2	3	4	2	1	3	2	4	4	4	4	2	2	4	4	1	2	4	2	1	3	3	4	4	1	2	4	2	1	4	1	1	4	2	1	4	4	2	1	1	2
	239	3		1	1	1	2	1	2	4	2	4	4	3	1	2	4	2	4	2	2	4	4	2	2	4	2	4	4	2	2	2	2	4	4	4	2	2	1	4	1	2	4	2	2	4	4	4	4
	240	3		3	2	3	1	1	3	4	1	2	1	2	2	2	4	1	4	2	2	2	2	2	2	1	2	2	1	1	2	2	4	4	2	2	2	1	4	2	2	2	2	2	2	1	2	2	2
	241	3		2	2	2	2	2	2	4	4	2	4	2	4	2	4	4	4	2	3	1	3	1	4	4	1	2	4	4	3	2	2	2	2	2	2	1	2	2	2	2	2	4	2	2	3	2	4
	242	3		4	2	4	2	4	2	1	2	2	4	4	2	2	2	3	2	2	2	4	1	4	2	2	2	2	4	2	2	4	2	1	2	2	3	2	3	4	2	1	4	4	1	2	2	4	1
	243	3		2	2	1	1	2	4	2	2	2	2	4	1	1	2	2	2	2	2	1	4	4	1	4	2	4	1	2	2	2	2	4	2	2	1	2	1	4	4	2	2	4	4	3	4	4	1
	244	4		1	4	2	3	4	4	1	4	2	4	1	1	2	2	4	2	4	4	4	4	2	4	1	4	4	1	2	2	2	2	4	1	2	2	2	2	2	2	4	4	2	4	4	2	2	3
	245	4		3	4	4	1	2	2	4	2	4	2	2	2	2	4	1	3	1	2	2	4	2	1	4	2	2	2	2	4	2	4	2	1	2	2	2	1	2	2	1	4	1	2	2	4	4	1
	246	4		2	1	1	2	2	2	2	2	2	2	1	2	1	1	4	4	1	2	2	1	2	4	2	2	2	2	2	4	4	4	1	2	2	1	2	4	2	1	2	4	1	3	4	1	4	4
	247	4		4	2	4	2	2	4	2	1	2	4	2	4	2	2	2	1	2	2	1	4	4	4	1	4	4	2	4	2	2	1	2	4	2	1	4	2	2	2	1	4	2	3	4	4	4	1
	248	4		4	4	4	4	4	4	2	1	1	4	2	4	2	4	2	4	2	4	4	2	1	2	1	1	2	1	2	4	2	2	2	2	2	4	2	2	2	4	1	4	2	1	1	2	2	2
	249	4		2	2	4	2	2	3	3	2	2	2	2	2	2	2	2	1	1	3	2	2	3	4	4	2	1	4	2	4	3	2	1	2	2	4	2	4	4	4	1	2	2	4	2	2	2	2
	250	4		4	2	2	2	2	4	4	1	2	2	2	2	3	2	2	2	3	2	2	4	4	2	4	4	4	2	2	2	3	4	2	1	2	4	2	4	2	1	2	4	4	2	2	2	1	4
	251	4		4	4	1	3	1	4	2	2	1	2	2	4	4	2	2	2	4	2	3	2	2	1	2	2	1	4	4	3	2	4	4	4	4	2	2	2	4	2	1	4	2	1	2	4	2	2
	252	4		1	2	2	4	1	2	3	4	2	4	2	2	4	2	1	2	4	4	3	2	4	2	4	1	4	1	2	2	2	2	1	2	2	2	4	4	2	2	2	4	2	4	2	2	2	2
	253	4		4	1	4	1	2	4	2	2	4	2	2	1	4	2	2	2	4	2	4	1	2	4	2	4	1	4	4	2	3	4	3	1	1	4	2	4	2	4	2	2	4	1	4	2	4	2
	254	4		2	1	4	2	3	4	4	1	2	2	1	3	2	1	1	4	4	4	2	2	4	2	2	4	4	2	3	4	2	2	2	1	1	2	4	1	4	4	2	4	4	4	2	4	2	1
	255	4		4	2	2	2	1	2	4	2	2	4	3	2	2	2	2	2	3	4	2	2	4	4	3	3	2	2	1	4	1	4	2	2	3	2	2	4	2	3	2	3	2	1	2	3	4	2
	256	4		2	2	1	4	1	1	4	4	4	2	4	3	1	2	2	2	2	4	4	2	2	2	1	4	2	4	2	4	1	4	4	2	3	2	4	3	4	2	4	2	2	2	4	2	3	2
	257	4		4	4	4	2	2	2	1	2	4	4	2	2	2	2	4	2	2	2	2	2	4	1	4	4	1	4	2	2	1	2	3	4	2	1	4	4	2	2	1	4	1	1	2	2	2	1
	258	4		2	4	2	4	4	2	1	2	2	4	2	4	4	2	2	1	3	2	2	2	4	2	2	2	4	1	2	2	4	4	1	2	2	2	4	4	4	2	1	2	1	2	2	4	4	2
	259	4		1	2	2	2	4	1	2	4	1	4	2	2	2	2	3	2	2	2	2	2	1	2	2	3	1	4	2	2	1	2	4	3	2	2	4	1	2	2	2	2	1	1	2	3	2	4
	260	4		2	3	3	4	2	4	2	2	1	2	1	4	2	1	2	1	4	2	4	2	2	1	4	2	4	4	1	4	4	4	4	2	2	2	2	2	3	2	2	1	1	1	4	3	2	4
	261	4		2	2	1	2	2	4	1	2	4	2	4	1	2	1	2	2	4	4	4	2	4	2	4	3	2	2	4	1	2	4	4	2	1	2	2	2	2	4	2	4	2	2	1	4	1	4
	262	4		4	3	3	2	4	2	4	2	4	2	2	2	2	1	4	4	2	2	2	2	2	4	4	3	1	2	4	4	2	2	1	4	2	4	4	2	2	2	2	1	1	2	2	2	2	4
	263	4		4	2	2	2	2	2	2	2	2	3	4	4	4	2	2	1	1	3	2	2	1	2	2	2	1	4	4	1	4	2	1	1	2	2	1	1	2	2	2	2	1	4	1	4	4	4
	264	4		2	2	4	4	4	4	4	4	4	4	2	2	2	1	2	2	3	4	4	2	2	2	1	2	4	2	4	2	4	4	2	1	4	4	4	2	2	2	2	2	2	1	4	1	4	2
	265	4		2	4	2	4	2	4	4	2	4	1	2	2	2	2	1	2	2	2	2	2	4	2	4	2	2	2	2	4	2	4	2	2	1	3	4	2	4	2	2	4	4	4	2	2	4	4
	266	4		1	4	1	1	4	4	4	1	4	2	1	2	4	4	1	2	4	2	2	2	2	4	4	4	2	4	2	1	1	4	2	2	2	2	3	4	3	4	4	3	2	1	2	2	1	4
	267	4		2	2	2	4	4	4	1	4	4	2	3	4	2	4	1	2	2	2	2	2	2	4	4	4	2	2	2	2	2	2	2	1	4	1	2	2	1	1	1	4	4	2	2	2	2	2
	268	4		2	4	1	1	4	2	1	4	1	1	3	2	2	1	2	2	2	2	2	4	4	2	4	2	3	2	2	2	2	4	4	2	2	4	4	1	4	2	4	4	2	1	2	4	1	1
	269	4		2	4	4	4	1	4	2	1	1	4	3	2	2	1	2	2	4	4	2	1	1	4	4	4	2	2	1	1	2	2	2	2	3	2	2	2	2	2	2	2	2	4	1	2	1	2
	270	4		3	4	2	2	2	2	1	2	3	2	4	2	2	4	2	2	4	2	1	2	3	2	2	2	2	2	2	2	4	2	2	2	2	1	2	1	2	4	2	2	2	1	1	4	1	4
	271	4		1	4	2	2	2	1	1	1	1	2	2	4	3	2	2	4	2	2	4	4	4	2	4	4	2	4	4	1	1	4	2	2	4	2	1	2	2	1	4	2	2	2	4	4	4	1
	272	4		4	1	4	2	2	2	3	3	2	3	4	4	4	2	4	2	2	2	4	4	2	1	4	4	2	4	1	2	1	4	2	1	4	2	4	2	2	3	2	2	4	1	4	4	2	2
	273	4		3	2	4	2	2	4	2	4	2	1	1	2	2	2	2	2	4	2	3	4	1	2	4	4	2	1	2	4	2	2	2	2	1	4	2	3	2	4	2	4	3	2	2	4	2	2
	274	4		3	1	2	2	4	4	4	1	2	4	2	2	4	4	2	4	4	4	1	2	1	4	2	4	2	3	2	4	2	1	2	4	4	2	4	4	1	4	4	2	4	3	1	4	4	2
	275	4		2	2	4	2	3	1	3	2	4	4	3	2	4	2	3	2	4	2	2	4	2	4	4	2	4	2	4	4	2	3	4	3	2	1	3	2	2	4	2	2	2	4	4	2	4	3
	276	4		4	2	3	4	2	2	4	4	2	4	2	2	4	4	4	3	4	2	1	3	3	1	3	4	1	4	2	1	2	2	1	2	2	1	2	2	4	2	4	2	3	4	3	2	4	2
	277	4		4	2	4	4	2	2	2	1	2	4	2	1	2	4	4	1	2	4	4	2	2	2	4	3	4	2	3	2	1	4	2	2	2	2	4	2	4	2	2	2	4	2	3	2	2	2
	278	4		4	2	2	2	2	2	1	4	3	2	1	3	2	1	4	1	1	2	4	4	4	4	2	4	2	2	2	1	2	3	2	2	2	4	2	4	4	2	1	1	2	2	2	4	3	2
	279	4		1	2	4	2	2	1	1	2	4	2	4	2	2	4	3	3	4	4	4	2	4	1	2	1	1	4	4	2	2	2	3	4	4	2	2	2	2	1	2	2	1	4	2	4	4	2
	280	4		2	4	1	4	2	4	2	4	2	1	2	2	2	1	4	4	4	1	4	2	1	2	2	2	4	2	2	2	2	2	2	4	1	4	2	4	2	2	1	2	1	4	2	2	1	2
	281	4		2	3	2	2	4	2	2	1	3	4	2	2	2	4	2	1	2	2	2	2	4	2	2	3	2	3	1	4	2	4	2	4	4	1	4	4	2	2	2	4	2	1	2	2	4	2
	282	4		2	2	2	2	2	4	3	1	2	2	1	4	4	1	1	2	1	2	2	2	2	3	1	2	2	2	2	4	4	1	1	1	1	2	4	2	2	4	4	2	2	1	1	4	2	2
	283	4		4	2	2	4	4	4	2	2	4	2	2	4	2	2	2	2	1	2	1	1	3	1	4	4	1	4	2	2	2	2	4	4	2	2	4	4	3	4	3	2	4	2	1	1	2	4
	284	4		3	2	1	4	2	2	3	4	2	2	2	2	1	2	4	4	1	1	2	2	2	2	3	2	4	1	4	2	2	4	2	2	4	4	1	2	2	4	1	1	2	2	4	2	2	4
	285	4		3	3	2	3	2	2	2	1	2	2	2	4	4	4	3	4	1	2	2	2	1	2	2	2	4	2	2	3	2	2	4	4	2	4	2	2	2	2	2	4	4	1	3	4	2	1
	286	4		4	4	3	4	4	4	2	1	2	4	3	4	4	2	2	3	4	4	2	2	1	4	4	4	2	4	4	4	4	2	2	2	2	2	2	2	4	4	2	1	2	1	4	2	4	2
	287	4		4	4	4	2	4	2	1	2	4	2	2	1	2	2	2	3	2	4	2	4	3	1	1	4	2	2	4	2	1	2	1	2	4	4	1	4	4	2	2	4	2	2	4	1	2	2
	288	4		1	1	2	2	2	1	4	2	1	2	3	2	4	2	1	2	2	4	2	1	2	1	3	2	4	4	4	2	2	2	4	4	2	2	2	4	2	4	2	4	2	4	2	2	4	2
	289	4		4	2	1	4	4	4	4	2	2	4	2	2	4	4	2	1	1	2	1	3	1	4	2	2	4	2	4	1	2	2	4	1	2	2	2	2	2	4	2	2	2	1	3	4	2	2
	290	4		2	2	2	4	1	2	2	2	3	4	2	4	4	2	2	2	2	3	2	2	3	1	1	1	4	2	2	2	4	1	4	3	4	4	1	2	2	1	1	4	1	1	4	4	4	4
	291	4		2	2	2	2	4	2	4	2	2	4	3	2	2	1	2	2	4	4	4	1	4	2	2	4	2	4	1	2	2	2	2	1	2	2	2	4	4	4	1	2	4	3	1	4	2	2
	292	4		2	2	2	1	1	2	1	2	2	1	2	2	1	4	4	1	4	2	2	4	4	2	4	2	4	2	3	4	2	2	2	4	1	1	1	4	4	1	2	2	2	3	1	1	2	1
	293	4		2	2	3	4	1	3	2	4	2	3	2	4	4	4	1	2	4	2	1	2	1	2	4	1	4	4	4	2	1	2	2	2	2	2	1	4	2	2	4	2	3	2	2	2	4	1
	294	4		4	4	2	2	1	2	2	2	4	2	2	2	1	4	2	2	3	4	2	2	2	4	3	2	2	2	4	2	2	1	3	2	4	2	2	4	2	1	4	2	4	2	4	2	2	3
	295	4		4	1	2	2	1	4	2	1	4	1	2	4	1	2	3	4	2	2	2	2	1	1	4	2	1	2	4	2	4	2	2	2	2	2	1	1	3	2	4	2	2	1	1	4	2	1
	296	4		2	3	2	2	4	2	2	4	4	1	2	4	1	2	4	2	4	4	2	2	2	2	1	4	2	2	4	2	1	2	2	4	4	2	4	2	2	1	2	4	4	4	4	2	3	2
	297	4		1	2	2	1	2	4	4	3	2	2	3	4	2	1	2	2	2	3	2	1	3	2	2	2	1	2	1	2	2	2	2	4	2	2	2	2	4	1	3	2	4	4	2	2	2	2
	298	4		2	2	4	1	4	3	2	3	4	1	2	4	1	2	1	4	1	3	4	2	1	2	2	1	4	2	2	2	2	2	2	1	2	2	4	4	1	4	2	4	4	2	1	2	1	4
	299	4		2	2	2	1	4	4	4	2	1	4	4	2	3	2	2	4	4	2	4	2	4	1	2	4	4	4	2	4	2	2	4	2	4	4	4	4	2	2	4	4	4	2	2	4	4	2
	300	4		2	2	1	2	4	3	2	1	2	2	4	2	4	3	2	2	1	2	2	2	2	2	4	4	2	2	2	2	1	2	2	2	1	2	2	2	4	2	4	4	4	1	4	1	4	4
	1	1		4	4	2	3	2	2	2	2	4	2	2	1	4	2	1	4	4	4	4	2	2	3	2	2	2	2	4	2	1	4	4	1	4	2	4	2	1	2	1	2	4	2	3	1	2	4
	2	1		2	2	4	4	2	4	2	1	4	4	4	2	4	1	2	2	4	2	2	2	4	1	2	2	2	4	4	4	2	2	2	4	4	2	4	1	2	1	2	4	2	2	2	4	2	2
	3	1		3	4	4	1	4	3	3	1	2	4	2	2	2	4	1	2	2	4	4	4	2	4	4	1	4	4	1	2	1	2	2	4	2	2	1	2	1	3	4	2	4	1	2	1	2	2
	4	1		2	1	4	2	3	4	2	2	4	2	4	3	1	4	1	2	4	4	4	2	1	2	1	2	4	2	2	2	4	4	2	2	4	2	2	3	1	1	2	2	1	2	2	2	1	4
	5	1		4	3	4	3	4	1	2	2	4	2	2	1	1	2	4	3	4	4	4	2	4	3	2	4	1	1	2	2	2	2	2	4	1	2	2	2	2	2	2	2	4	1	2	4	3	1
	6	1		2	4	3	2	1	1	4	2	2	1	4	2	4	2	4	3	2	3	2	4	3	1	4	2	3	2	4	4	2	4	4	4	4	3	3	2	3	4	2	2	2	4	2	4	4	1
	7	1		2	2	4	4	2	4	4	1	4	4	2	4	3	4	1	2	2	2	4	2	1	1	2	2	1	2	2	4	4	1	3	1	3	3	4	4	2	3	4	2	4	2	4	4	4	1
	8	1		2	2	2	4	2	2	4	4	3	1	2	2	2	4	2	2	2	4	2	4	2	1	2	2	4	2	2	1	1	2	4	4	2	2	2	2	4	4	4	1	4	4	4	4	3	2
	9	1		4	2	1	2	2	4	3	4	2	1	4	2	4	4	2	1	2	2	2	1	2	2	4	2	2	4	2	1	4	3	2	4	4	2	2	4	1	4	4	3	1	4	4	1	2	2
	10	1		1	4	4	1	2	2	2	2	2	2	3	2	1	4	2	4	2	4	4	4	1	4	2	2	2	2	2	1	2	2	4	4	1	4	4	1	3	1	2	1	2	2	2	1	2	2
	11	1		2	4	2	2	2	2	2	3	2	2	4	3	4	1	2	2	2	2	4	2	1	2	1	4	4	4	4	4	2	2	4	4	3	4	2	2	2	3	4	4	2	1	1	3	1	1
	12	1		1	1	1	4	4	2	4	2	2	4	4	4	2	4	4	4	2	2	1	2	2	2	2	2	2	3	3	4	2	2	2	4	2	4	3	4	4	2	2	2	2	2	4	2	4	2
	13	1		4	2	2	2	2	2	1	1	4	4	2	4	2	2	2	4	2	2	1	2	2	1	4	4	4	4	2	3	2	1	2	4	2	2	4	2	4	4	2	2	4	1	2	2	3	1
	14	1		2	2	4	4	2	3	2	4	4	4	2	2	2	4	2	2	2	4	2	2	2	2	4	1	2	2	1	2	2	2	2	2	2	2	2	2	4	2	4	3	1	3	1	1	3	2
	15	1		2	4	4	1	4	4	2	2	2	2	2	4	2	2	2	1	4	2	3	4	4	4	1	2	2	4	4	2	4	4	2	2	2	4	1	4	1	4	2	4	2	2	4	4	1	2
	16	1		2	2	4	1	2	1	1	2	1	4	2	4	1	2	1	1	2	2	4	4	4	2	2	4	1	2	2	3	4	1	4	4	2	4	2	1	3	3	2	2	2	2	2	2	2	1
	17	1		4	1	2	2	2	4	2	4	2	2	2	3	2	2	2	4	2	2	2	2	2	1	1	2	3	4	4	3	2	3	1	2	2	1	1	2	2	2	2	4	2	2	4	2	1	1
	18	1		2	4	2	4	4	2	2	2	2	4	2	2	2	3	4	2	2	2	4	1	1	2	4	4	2	2	2	1	2	1	2	2	2	2	2	2	2	3	2	1	4	2	4	2	3	2
	19	1		2	2	2	2	4	1	3	4	2	2	4	2	2	3	2	4	2	1	2	4	2	4	2	2	2	1	4	2	2	4	2	2	2	1	2	2	2	2	2	2	2	2	3	1	2	4
	20	1		2	2	2	1	4	1	1	2	4	4	2	2	1	1	3	1	2	2	4	1	3	2	2	1	2	2	4	2	3	2	4	2	4	2	2	4	2	1	4	2	2	1	4	4	4	4
	21	1		2	2	2	4	4	4	4	2	2	4	2	2	4	3	2	2	4	2	2	4	4	2	3	4	4	3	4	2	1	1	4	2	4	3	1	4	4	3	1	1	1	4	2	1	2	2
	22	1		4	4	4	4	4	2	1	4	2	4	2	4	2	2	1	2	4	1	2	2	4	4	1	1	2	4	2	4	2	4	4	2	4	2	1	2	2	1	2	4	4	4	1	4	4	2
	23	1		1	3	2	2	2	2	1	2	1	2	4	2	4	3	4	2	3	1	2	2	2	2	2	2	4	2	2	4	2	2	1	4	4	2	1	1	2	4	2	4	2	3	2	2	1	2
	24	1		2	2	2	1	4	2	2	2	4	2	4	2	2	2	2	2	2	4	1	1	2	1	4	2	2	3	4	1	1	2	2	4	2	4	2	2	2	2	1	4	1	2	2	4	4	2
	25	1		1	2	4	4	4	2	2	1	2	2	2	4	4	2	1	2	2	1	4	4	2	2	2	2	2	4	2	4	2	2	1	4	4	2	4	4	2	2	2	2	2	2	4	2	4	2
	26	1		2	2	3	4	4	4	1	4	2	4	2	2	2	2	4	4	4	2	1	4	3	1	2	4	3	4	1	3	4	1	2	4	2	2	2	2	4	4	2	4	2	2	2	2	2	2
	27	1		2	2	4	2	4	4	4	2	2	1	2	1	1	4	4	2	1	4	4	1	4	4	4	4	2	4	2	1	2	2	2	2	4	2	3	4	2	2	3	2	2	4	4	4	1	2
	28	1		2	2	1	4	4	2	2	4	4	2	2	1	2	3	2	4	4	2	2	2	4	2	2	3	4	4	2	2	2	1	2	2	2	1	4	2	4	1	2	2	4	2	4	2	2	4
	29	1		1	3	3	2	2	2	4	2	2	4	1	2	4	2	2	2	4	2	2	1	2	4	2	4	2	3	4	2	2	2	4	2	3	4	4	2	3	2	4	3	3	4	2	2	3	2
	30	1		1	1	2	1	3	4	4	4	4	2	2	4	3	2	2	4	2	4	2	4	3	2	4	1	3	2	2	4	4	2	2	4	4	4	2	1	2	2	4	2	4	4	2	2	2	4
	31	1		1	2	4	4	4	1	2	4	2	4	2	2	2	2	1	2	4	4	3	2	4	4	2	2	2	4	4	4	4	4	2	4	4	2	4	4	2	1	1	2	2	2	2	4	2	2
	32	1		4	4	3	2	3	1	3	2	1	4	4	2	2	4	2	4	1	4	2	2	4	2	2	1	4	3	1	2	4	2	4	2	2	2	2	2	4	4	1	4	1	2	3	4	2	2
	33	1		2	4	2	2	2	4	2	3	2	2	2	3	2	4	4	4	4	2	4	4	4	2	3	2	2	1	2	2	4	2	4	2	2	3	4	3	2	2	2	2	2	4	1	4	4	2
	34	1		2	3	3	2	2	4	2	2	4	2	2	2	4	2	1	1	4	2	2	4	2	1	4	3	2	2	4	4	4	2	4	3	1	4	3	3	2	4	1	1	2	2	4	2	2	2
	35	1		4	4	3	4	2	4	2	1	2	2	2	2	1	2	2	1	1	1	2	4	4	2	3	4	2	2	1	4	4	4	2	1	2	2	2	2	2	4	4	2	2	1	2	4	4	2
	36	1		4	2	2	2	2	4	2	2	4	2	2	2	2	2	2	1	4	2	4	4	1	4	2	2	2	2	4	2	2	2	4	2	4	2	2	2	2	1	4	1	1	2	1	2	2	1
	37	1		4	2	4	4	4	2	1	1	2	2	2	1	4	2	2	2	1	2	4	2	4	2	4	4	1	3	2	4	1	1	4	2	4	4	2	1	2	2	4	4	1	4	4	3	4	4
	38	1		2	4	4	4	3	2	4	2	2	4	2	2	2	2	2	2	2	2	2	4	1	4	4	3	4	2	2	1	2	1	2	3	2	2	2	4	2	3	4	2	2	4	2	4	2	1
	39	1		1	1	2	2	2	2	1	2	1	1	2	1	1	4	3	2	1	1	1	2	1	4	4	2	2	3	2	4	2	4	1	2	2	2	4	1	2	3	4	1	4	4	1	3	2	2
	40	1		4	4	4	3	2	3	4	1	2	2	2	4	2	2	2	1	2	2	2	4	3	2	2	3	2	1	4	2	4	2	4	4	2	1	4	2	1	1	2	1	4	1	1	2	4	3
	41	1		2	4	2	2	2	3	2	3	2	1	4	3	2	2	2	2	4	1	2	1	2	1	4	4	3	3	2	2	2	4	2	1	4	4	1	2	4	2	4	1	4	2	4	1	3	4
	42	1		2	2	2	1	2	4	2	4	2	2	1	2	2	2	1	4	4	2	1	2	1	2	2	4	3	4	1	2	4	2	1	2	1	2	4	2	4	1	2	1	2	1	4	2	2	2
	43	1		4	4	2	2	1	2	2	1	2	1	2	2	2	4	4	3	2	2	4	1	2	2	2	2	1	2	4	4	1	4	2	4	4	2	4	4	2	4	2	3	4	2	2	4	4	2
	44	1		4	4	1	4	1	4	2	3	2	4	2	2	2	3	2	1	2	4	2	4	4	4	2	2	3	2	2	2	1	1	2	1	1	2	1	4	4	3	2	2	4	3	2	2	2	4
	45	1		2	4	2	2	3	4	2	1	2	3	2	1	1	2	1	4	2	4	4	2	1	4	4	2	4	1	2	1	2	1	2	4	4	2	1	2	2	4	4	3	2	1	2	1	4	4
	46	1		2	4	2	2	4	2	4	2	2	4	1	3	4	2	1	2	2	1	1	2	4	4	4	1	1	2	4	2	2	4	1	4	2	2	3	4	4	4	2	2	2	2	2	2	4	4
	47	1		2	4	1	2	4	1	2	3	3	2	4	1	2	2	4	4	4	2	2	1	1	4	4	2	1	2	2	4	2	2	2	4	1	3	2	2	3	4	2	4	2	2	2	2	2	4
	48	1		4	1	2	4	2	4	2	2	2	1	4	2	4	2	4	2	2	2	1	2	2	2	2	2	2	2	4	2	1	4	2	1	1	2	4	4	2	1	3	4	4	4	1	2	4	4
	49	1		2	4	1	4	2	2	1	3	2	2	3	4	2	2	4	1	1	2	2	2	4	2	4	1	2	2	1	2	4	4	2	2	4	2	4	2	2	2	3	1	2	2	2	3	1	4
	50	1		2	2	1	4	2	2	4	2	2	2	2	2	4	2	4	2	4	2	1	2	4	2	2	1	3	1	2	1	4	4	3	4	4	4	2	4	2	4	1	2	4	1	1	2	2	4
	51	1		4	2	2	2	4	4	2	2	1	4	2	4	4	4	4	1	2	2	4	4	4	2	2	2	1	2	4	4	1	3	4	4	4	3	2	2	4	4	2	4	1	1	2	4	2	2
	52	1		2	2	2	4	1	4	2	1	2	2	4	2	2	2	4	4	3	4	2	4	2	2	2	1	2	2	4	4	2	1	2	1	2	2	4	1	2	2	2	4	4	3	1	2	1	1
	53	1		3	2	2	2	2	4	4	1	2	3	2	2	4	4	4	2	2	4	4	2	4	1	4	1	2	4	2	4	1	4	4	2	4	4	2	1	4	2	2	4	4	1	4	4	2	4
	54	1		4	4	2	3	1	4	3	4	2	4	2	1	4	2	3	2	3	2	2	2	2	4	4	1	2	1	2	2	1	2	4	3	1	4	2	4	2	4	4	2	4	2	4	2	4	4
	55	1		2	2	2	2	3	1	2	1	4	1	2	2	2	2	3	3	2	2	2	2	2	4	2	1	2	4	2	2	2	2	4	2	4	1	4	2	4	2	2	2	3	2	4	4	2	2
	56	1		4	1	2	4	2	4	4	2	2	3	2	4	4	1	2	2	3	2	4	2	1	1	4	1	4	1	1	2	4	2	4	4	2	1	4	4	1	2	2	2	2	2	2	2	2	2
	57	1		1	2	2	1	2	1	1	4	1	1	4	4	2	4	2	2	1	1	4	4	4	3	2	2	2	4	4	2	3	3	4	4	2	4	2	2	2	2	2	1	2	2	2	3	4	2
	58	1		3	1	4	4	4	2	2	1	4	1	1	1	4	2	4	4	2	2	2	4	2	4	2	2	4	4	4	2	2	2	1	2	4	4	2	2	2	4	4	4	4	2	2	2	2	1
	59	1		1	1	2	4	2	4	4	2	4	1	2	2	4	2	4	4	2	2	2	2	4	2	2	2	4	2	2	2	4	4	2	2	4	2	2	2	4	1	3	4	2	4	3	2	4	4
	60	1		4	2	2	4	2	2	3	1	2	4	4	2	2	4	2	4	1	2	2	2	2	2	2	4	4	4	3	2	2	2	2	2	1	1	3	2	2	2	2	2	1	2	4	2	2	4
	61	1		2	4	2	4	4	2	2	4	2	1	2	4	4	1	2	1	2	2	2	2	1	1	4	2	2	2	4	2	3	1	3	1	3	2	2	2	2	4	2	4	2	2	2	2	2	1
	62	1		2	2	2	1	4	2	1	1	2	1	2	2	4	4	1	2	4	2	3	4	1	2	4	2	3	1	2	2	1	2	2	1	1	2	3	3	1	1	2	4	2	1	4	3	4	1
	63	1		2	2	4	3	1	4	1	2	4	4	4	2	4	4	2	2	2	4	1	2	1	2	1	1	2	4	4	3	4	4	2	2	4	2	2	4	2	2	2	2	4	1	2	2	2	1
	64	1		2	2	4	4	4	4	2	4	4	1	3	4	4	3	2	2	4	4	2	2	4	1	2	2	4	4	2	4	2	1	2	2	2	2	1	1	1	2	4	1	4	4	1	3	4	4
	65	1		2	2	2	4	1	2	2	3	4	1	2	1	1	2	2	1	4	2	1	1	4	1	2	4	2	2	2	4	2	2	4	4	2	4	2	2	3	4	2	3	2	3	1	1	4	4
	66	1		2	2	4	3	4	4	2	4	2	2	2	4	2	3	4	2	2	4	2	2	1	3	2	3	4	4	3	2	2	2	4	4	4	1	1	2	1	2	1	1	2	4	2	2	2	2
	67	1		2	2	4	4	4	2	4	4	4	2	4	2	2	3	2	1	2	1	1	1	4	2	2	4	4	2	4	2	4	2	2	2	4	1	2	2	1	4	1	1	1	1	4	2	1	2
	68	1		4	4	2	4	4	2	4	1	2	2	4	2	2	3	3	2	2	4	4	2	4	4	4	2	4	2	2	1	2	2	4	4	2	2	1	2	4	1	2	4	2	1	2	2	1	2
	69	1		4	2	3	2	2	2	4	4	4	1	2	2	4	4	1	2	2	4	2	2	2	4	1	1	2	2	2	1	4	2	2	4	2	4	2	4	2	4	4	2	4	2	2	4	1	2
	70	1		2	2	1	3	4	1	4	4	4	2	1	2	2	1	2	3	2	2	1	2	2	4	4	4	3	4	4	4	4	2	4	4	2	2	1	2	4	4	2	4	3	4	2	2	2	4
	71	1		2	2	1	2	4	1	2	4	2	4	2	4	2	2	1	2	1	1	2	1	1	4	2	1	4	4	4	2	2	4	2	1	2	4	4	4	4	4	4	4	2	4	2	2	2	2
	72	1		1	2	2	4	2	1	2	1	2	1	4	4	2	4	1	1	1	4	4	4	1	2	2	2	2	3	1	2	2	1	2	4	2	2	2	1	4	2	3	1	4	2	2	2	3	4
	73	1		1	2	4	3	4	2	4	2	2	2	2	4	3	2	4	3	4	1	2	4	4	1	1	2	2	4	2	2	3	4	2	2	2	2	2	4	2	1	4	2	2	2	2	2	3	2
	74	1		4	1	1	2	4	4	2	4	2	4	4	2	2	4	2	3	4	1	1	2	4	4	4	2	4	4	2	2	2	4	2	2	1	2	4	4	3	4	3	2	4	1	2	4	2	1
	75	1		2	4	2	1	3	1	2	3	4	2	4	4	2	2	2	4	2	2	2	4	1	4	2	2	2	4	2	2	1	2	2	4	2	1	4	4	1	2	2	1	4	4	1	4	4	1
	76	1		2	2	2	4	2	3	2	2	2	2	2	2	4	4	2	1	2	4	4	1	4	4	2	2	2	4	2	2	4	2	2	1	2	4	3	2	3	4	2	4	4	2	4	4	4	4
	77	1		2	2	2	4	2	1	2	1	2	2	2	4	2	3	2	4	2	2	1	2	2	1	4	1	2	2	1	4	1	1	4	1	2	4	4	4	2	2	2	2	2	2	4	4	4	2
	78	1		1	4	1	2	1	1	2	2	1	4	1	4	2	2	2	1	1	1	2	4	2	1	3	2	2	4	2	1	4	1	2	4	1	4	2	4	2	1	4	2	2	2	2	2	3	4
	79	1		4	2	3	2	4	2	3	4	2	4	3	4	2	4	2	4	1	1	2	4	4	2	4	2	3	1	2	2	2	4	2	2	2	4	4	2	1	4	4	4	2	3	4	4	2	2
	80	1		2	3	4	3	2	2	2	2	1	2	4	2	2	4	4	4	4	4	2	2	2	3	4	4	4	4	4	4	2	1	2	2	2	2	1	1	3	2	1	2	4	1	4	1	1	2
	81	1		2	4	4	2	2	1	2	4	2	1	4	4	2	2	4	4	2	2	4	2	2	2	2	4	2	2	4	1	1	3	4	1	4	4	2	2	2	2	2	4	1	2	4	1	4	2
	82	1		2	2	4	2	1	2	2	4	4	2	4	2	4	2	4	2	4	4	2	2	2	2	2	2	2	2	4	2	1	2	2	2	4	4	4	2	2	4	1	2	4	2	1	2	2	2
	83	1		2	4	1	2	4	2	2	2	4	2	2	4	4	3	2	2	4	1	1	4	2	1	4	2	4	2	3	3	4	4	2	2	2	3	2	2	1	1	4	3	1	1	2	2	4	1
	84	1		1	2	4	1	2	1	2	4	4	1	2	2	4	2	2	2	1	2	2	2	2	2	1	3	2	2	1	1	2	2	2	2	3	4	2	4	2	2	2	1	3	2	2	2	2	2
	85	1		4	1	2	3	1	3	4	2	2	4	4	4	1	2	2	4	2	2	4	3	2	1	2	2	2	3	3	2	4	2	2	4	2	2	4	1	4	2	4	3	2	4	2	2	1	4
	86	1		2	2	2	4	4	4	4	2	2	2	2	1	2	2	4	2	4	4	4	2	2	2	1	2	2	1	2	4	2	2	2	2	2	2	4	2	1	2	2	3	4	2	2	4	2	2
	87	1		2	1	2	4	4	4	2	4	2	4	1	2	3	2	4	2	4	4	4	2	2	4	2	2	2	1	4	2	3	2	1	4	1	2	4	1	2	4	4	4	2	4	4	4	4	4
	88	1		2	2	2	1	2	4	2	1	3	2	2	2	1	1	2	4	4	2	3	4	2	2	4	2	4	2	4	2	2	4	2	2	4	4	2	2	1	2	2	1	4	2	2	2	4	4
	89	1		2	2	4	2	4	4	2	2	2	1	3	4	4	4	1	4	4	2	1	1	3	2	4	2	1	1	2	2	2	2	2	4	1	1	4	2	2	2	4	1	4	2	1	1	3	4
	90	1		4	2	1	1	2	3	4	2	1	2	2	2	4	2	3	1	2	2	1	1	4	2	2	1	1	4	4	2	1	1	2	4	1	4	2	2	2	4	2	2	2	4	4	2	2	4
	91	1		2	2	1	2	4	4	2	4	4	2	2	4	4	2	2	2	3	2	4	2	1	4	2	4	3	2	3	2	2	1	4	2	1	2	4	4	4	2	2	3	2	3	2	4	2	4
	92	1		2	1	1	3	2	4	2	2	3	2	2	2	4	2	2	4	1	2	4	3	1	2	2	2	2	2	2	4	2	2	4	4	2	2	1	2	2	2	2	4	3	2	2	4	2	4
	93	1		4	2	4	1	2	3	4	1	2	3	2	2	4	4	3	4	1	4	2	2	2	2	2	2	2	2	1	4	2	2	2	2	3	2	4	2	2	2	2	2	1	1	2	4	2	4
	94	1		2	4	2	4	2	4	4	4	1	2	2	4	2	4	2	2	4	4	2	2	2	2	4	2	4	2	2	2	2	4	1	2	2	4	4	4	1	4	4	2	2	2	4	4	2	4
	95	1		2	4	2	1	2	4	4	3	2	3	3	4	3	4	2	4	2	2	2	2	2	1	2	2	3	2	1	1	2	1	4	4	4	2	4	4	2	2	3	1	4	2	2	2	2	4
	96	1		2	4	3	2	2	4	4	4	1	4	1	4	1	2	4	2	3	2	2	4	2	4	2	4	2	2	2	2	2	1	4	1	1	4	2	4	4	4	1	2	4	4	3	2	4	3
	97	1		4	2	2	3	2	4	2	2	1	4	2	1	2	4	3	2	4	2	2	4	2	2	2	4	2	2	1	4	2	4	2	4	2	2	2	1	4	2	4	2	3	4	2	1	2	4
	98	1		4	2	2	2	4	4	2	4	4	3	4	4	4	1	1	4	2	1	2	4	1	2	1	4	2	4	2	4	1	3	1	4	4	2	2	2	2	2	4	3	4	1	2	2	1	1
	99	1		4	2	2	2	2	2	2	3	1	4	2	2	2	3	4	2	2	4	2	1	4	4	4	4	4	2	2	4	1	1	4	1	2	4	4	2	2	4	2	2	3	3	2	2	4	2
	100	1		2	1	1	2	4	2	3	4	1	2	4	2	2	1	1	2	1	4	2	2	2	2	3	4	2	2	2	4	1	2	2	4	2	2	4	2	4	2	2	2	4	4	2	2	2	4
	101	1		3	2	4	2	1	4	2	2	1	2	2	2	4	4	2	1	1	2	2	1	4	2	2	2	2	1	2	3	2	2	2	2	1	2	2	2	2	3	1	4	2	2	4	2	2	4
	102	1		2	4	2	2	2	2	2	2	2	1	1	2	2	4	4	1	2	4	2	2	4	4	2	1	2	4	2	2	2	2	4	3	1	2	2	4	2	4	2	4	1	3	4	2	1	2
	103	1		4	4	1	1	2	4	2	2	4	3	1	2	4	2	1	2	2	1	2	4	2	4	2	1	4	1	4	4	4	2	1	2	4	4	2	4	4	1	2	3	2	2	2	3	4	4
	104	1		2	4	1	2	2	4	2	2	1	2	1	2	3	2	1	2	2	4	4	2	3	2	1	2	2	4	2	2	2	4	2	2	4	2	3	1	2	2	2	2	4	2	1	2	2	4
	105	1		2	4	4	2	2	4	2	2	2	3	1	2	2	4	2	1	2	4	1	4	2	2	4	1	1	2	2	2	4	1	3	1	2	2	4	2	4	4	4	3	2	4	2	4	2	2
	106	1		4	4	4	2	4	3	4	2	1	2	1	2	2	3	2	2	1	2	2	2	4	2	1	1	1	2	2	2	2	4	2	2	2	2	2	2	2	2	2	4	3	3	2	4	1	4
	107	1		1	4	4	4	3	2	4	4	1	4	4	2	2	4	4	4	2	2	4	2	2	4	2	4	2	2	2	2	2	2	4	2	2	2	2	4	4	1	1	2	2	2	1	4	2	2
	108	1		4	3	4	4	2	2	2	2	2	4	1	4	3	4	2	2	2	2	1	3	2	4	2	2	2	4	4	2	4	2	2	3	2	4	1	2	4	2	4	4	2	2	4	2	3	1
	109	1		1	2	4	4	2	2	4	2	2	4	4	4	2	1	1	4	2	4	3	2	2	2	2	2	4	4	2	2	2	3	4	2	4	2	4	3	4	4	4	2	2	2	2	4	2	4
	110	1		1	2	1	4	2	1	3	3	2	3	1	4	3	2	2	4	4	4	4	2	3	4	4	2	4	4	1	2	4	3	4	2	3	4	1	1	1	2	4	4	4	1	3	4	2	2
	111	1		4	4	2	2	4	4	2	2	4	2	2	3	2	4	1	2	4	2	1	3	2	2	2	2	4	2	1	4	1	2	4	1	4	3	2	1	3	4	4	2	1	4	2	2	2	4
	112	1		4	1	4	2	3	2	2	4	2	1	2	2	4	1	2	4	4	4	2	4	4	4	2	1	1	2	1	2	2	2	2	4	2	4	1	1	4	3	2	2	1	1	2	2	4	3
	113	1		4	4	2	4	4	4	2	4	2	2	2	2	4	2	2	4	4	1	2	3	4	2	4	2	4	2	2	1	2	2	2	4	2	3	2	2	4	3	4	1	4	4	3	4	2	4
	114	1		4	4	1	2	2	4	1	2	1	2	2	1	4	2	2	2	2	2	4	2	2	4	4	2	3	1	1	4	4	4	2	3	2	2	4	2	4	2	2	2	3	2	2	4	2	2
	115	1		1	1	1	2	2	2	2	1	4	2	2	1	2	4	1	1	2	2	4	4	2	4	2	2	1	2	2	2	2	4	1	2	4	2	1	4	4	4	1	3	2	2	2	1	1	4
	116	1		2	2	4	2	4	2	4	2	4	4	2	4	4	2	4	2	2	4	2	2	3	1	2	2	2	4	2	2	4	1	3	4	2	4	2	2	1	2	4	4	2	2	2	2	4	1
	117	1		3	4	2	1	2	2	2	1	2	4	2	4	2	4	2	4	1	2	2	4	2	4	4	1	2	1	4	4	2	2	4	4	4	1	4	4	4	2	3	4	2	1	2	2	2	2
	118	1		2	4	2	2	2	1	1	2	2	2	2	2	1	4	2	3	2	2	1	2	2	4	2	2	4	2	4	2	2	2	2	1	1	1	2	2	1	1	2	4	4	4	1	4	4	2
	119	1		4	4	1	2	4	2	2	2	2	2	4	2	2	2	3	4	2	1	4	2	4	2	2	2	2	1	4	2	2	2	4	1	3	2	2	3	1	2	2	3	1	4	2	4	2	2
	120	1		4	1	3	4	4	2	4	2	4	4	2	2	4	1	3	2	2	4	1	1	4	4	3	2	3	2	1	3	2	2	2	1	2	2	4	2	2	4	2	2	2	2	2	1	4	1
	121	1		4	3	2	2	2	4	4	4	2	4	4	4	4	2	2	2	4	4	1	4	2	1	1	3	1	2	2	1	4	4	2	4	2	4	2	3	2	2	1	4	1	2	1	2	2	2
	122	1		4	2	4	2	2	4	4	4	2	4	4	2	2	2	4	4	3	2	2	2	2	4	2	2	3	3	3	1	4	2	2	4	4	2	2	4	2	3	1	4	2	4	2	4	3	2
	123	1		4	4	4	2	4	2	4	3	2	3	4	2	2	2	4	3	4	2	2	4	4	1	2	1	2	2	2	2	1	4	4	1	4	2	2	4	4	1	1	4	4	1	4	2	1	4
	124	1		2	2	2	2	4	2	2	4	4	4	4	4	2	4	2	2	1	1	2	1	2	4	4	2	4	4	1	3	1	4	2	2	2	4	1	2	2	4	1	1	1	2	2	4	4	4
	125	1		4	1	4	4	3	2	4	4	1	2	2	2	4	2	2	4	2	2	2	4	2	4	2	2	1	2	3	2	4	2	2	4	4	1	3	2	2	4	2	1	2	4	4	2	1	2
	126	1		1	1	1	3	3	4	2	4	4	2	4	2	4	2	2	4	3	4	4	2	4	4	2	2	2	2	2	4	3	2	1	1	1	2	2	2	2	4	4	4	1	4	2	1	4	2
	127	1		1	2	2	2	4	4	4	4	2	1	1	2	4	2	4	2	1	4	2	4	4	4	2	2	4	1	2	1	4	1	2	1	2	3	2	1	2	4	2	4	4	4	4	2	4	4
	128	1		4	4	2	2	2	4	4	4	2	2	4	2	4	4	4	4	2	2	3	2	2	2	2	4	1	2	1	2	1	1	2	4	2	4	1	4	2	2	2	4	4	2	1	2	4	2
	129	1		2	1	1	4	2	2	2	2	2	4	4	2	2	4	2	3	2	2	2	2	2	3	2	4	3	4	4	2	2	2	2	2	4	2	2	4	4	2	4	1	2	1	4	4	1	2
	130	1		1	2	4	2	2	4	2	2	2	4	4	4	1	2	2	2	2	2	4	2	2	4	2	2	4	4	4	4	2	3	3	2	1	2	4	2	4	1	2	2	2	1	2	2	2	2
	131	1		4	2	1	4	2	2	2	1	4	2	4	2	2	2	2	1	1	2	1	2	2	2	2	2	2	1	4	3	2	2	4	1	1	1	2	2	2	4	4	4	2	4	4	2	2	4
	132	1		1	2	3	2	4	2	2	4	4	2	1	2	2	4	4	4	4	2	2	4	2	4	3	2	1	2	2	1	2	4	4	4	2	1	1	4	2	1	4	2	2	1	4	2	4	4
	133	1		1	2	4	2	2	2	2	1	4	4	4	2	1	4	3	4	4	2	2	4	2	1	4	1	2	4	4	2	2	4	4	4	2	2	2	4	3	2	2	2	2	2	4	4	2	2
	134	1		2	2	2	4	2	2	2	2	4	2	1	4	2	1	4	1	2	4	1	2	2	2	1	4	4	4	2	1	4	2	4	2	2	4	1	1	2	2	2	1	2	4	2	4	2	4
	135	1		4	2	1	1	2	2	1	2	1	2	4	2	2	2	4	3	2	2	2	1	4	2	4	2	1	2	4	4	4	2	1	2	1	4	2	2	1	2	2	4	2	1	2	4	4	2
	136	1		4	4	4	4	4	1	1	2	1	2	2	1	2	2	2	2	4	4	2	4	2	2	2	4	4	2	4	2	4	4	4	4	2	2	2	2	2	4	2	4	1	4	2	4	2	3
	137	1		3	3	4	1	2	2	4	2	4	2	4	4	4	3	1	2	2	2	1	3	1	4	2	2	4	2	2	4	1	4	4	4	2	4	4	2	4	4	1	2	1	3	4	4	2	4
	138	1		2	2	2	1	2	4	2	2	1	1	2	4	2	3	4	2	2	2	3	4	1	4	1	2	3	4	2	2	2	3	2	4	2	4	2	2	2	4	1	4	4	4	4	2	4	4
	139	1		2	2	4	4	2	2	1	1	2	4	2	1	3	2	4	2	2	2	2	2	4	2	2	4	4	4	2	4	2	2	3	1	4	4	4	1	1	4	2	2	2	4	1	4	2	2
	140	1		2	4	2	2	1	2	2	4	4	4	2	2	2	2	3	2	4	1	4	2	4	4	4	1	4	4	2	4	2	4	3	2	4	2	1	2	4	4	2	2	1	4	2	2	4	1
	141	1		2	2	2	3	2	3	1	2	2	1	2	4	1	2	2	2	4	2	4	4	1	4	4	2	2	2	4	2	2	4	2	2	4	4	2	3	1	1	2	4	4	2	2	2	2	2
	142	1		1	4	2	2	2	2	2	3	2	2	2	2	4	4	2	4	3	2	2	2	4	2	4	4	1	2	4	1	2	3	2	1	2	2	2	1	2	2	4	3	1	2	2	4	2	2
	143	1		3	2	2	4	2	4	4	2	1	4	4	2	2	4	2	2	1	2	2	4	2	4	2	2	2	4	2	2	2	2	4	2	1	4	2	4	2	2	1	4	2	4	4	1	2	3
	144	1		2	4	2	3	2	4	4	1	2	2	2	1	2	2	4	1	2	2	2	4	4	2	4	2	2	2	2	1	2	4	4	2	2	2	2	2	2	4	2	1	2	2	2	2	1	2
	145	1		4	4	2	4	1	4	2	2	1	2	2	4	4	2	1	1	4	2	2	2	2	2	2	4	1	3	4	2	2	2	2	2	2	2	1	2	4	1	4	1	1	2	1	4	4	4
	146	1		2	4	2	2	1	2	3	4	2	2	1	4	2	2	1	2	4	2	4	4	4	3	2	1	2	2	2	1	1	2	3	2	1	2	1	2	1	2	1	2	4	2	3	2	2	2
	147	1		2	1	4	2	2	2	2	2	2	2	4	2	1	4	3	2	1	2	1	1	1	2	4	4	1	2	2	4	2	2	2	1	1	2	1	2	2	4	4	1	4	4	1	2	1	2
	148	1		2	2	4	1	4	2	1	2	4	2	2	4	2	2	2	2	2	2	3	3	3	4	2	4	2	4	2	4	4	2	4	4	1	2	2	4	2	4	2	1	2	2	4	4	4	2
	149	1		1	3	3	4	2	2	3	2	4	1	2	2	2	2	2	4	2	2	4	2	2	4	4	4	2	2	1	2	4	1	4	2	2	2	1	2	3	2	2	3	4	1	4	1	1	3
	150	1		2	1	2	1	1	4	3	2	1	2	2	2	2	4	4	2	2	4	4	2	1	4	2	4	4	4	2	4	4	2	4	4	2	4	2	2	2	2	2	4	1	2	2	2	2	4
	151	1		4	1	1	2	2	4	1	2	4	2	4	1	1	2	4	2	4	4	2	2	4	2	3	2	4	4	2	2	2	4	3	2	4	1	4	2	2	4	2	3	1	2	2	2	2	2
	152	1		4	4	4	3	3	2	4	2	4	4	2	1	2	2	2	2	4	2	1	4	2	2	1	2	2	2	1	2	2	1	2	2	4	2	4	2	4	2	2	2	1	2	2	1	2	3
	153	1		1	2	2	2	3	4	4	2	4	2	2	2	3	2	2	4	4	2	2	2	4	4	4	2	2	2	3	2	4	2	1	4	4	2	2	2	2	4	1	2	2	2	2	2	4	4
	154	1		4	4	2	4	4	2	1	1	1	4	4	2	1	2	2	2	2	4	2	4	4	4	4	2	2	2	2	4	2	2	1	1	2	2	2	4	4	4	2	2	2	1	2	4	1	1
	155	1		2	4	2	4	4	4	2	2	1	1	3	4	2	2	2	2	1	1	3	2	4	4	1	1	1	2	4	2	2	4	2	2	1	2	2	4	3	2	2	2	2	4	4	1	4	2
	156	1		2	2	1	4	2	3	4	2	4	4	1	2	2	4	2	1	2	2	2	4	4	2	2	4	1	4	2	4	2	4	2	2	4	4	1	1	2	3	2	1	2	2	2	2	2	4
	157	1		4	2	4	2	4	2	2	4	4	2	2	2	2	4	2	4	2	1	1	4	1	2	4	1	2	3	1	3	2	1	1	4	1	2	2	2	2	2	4	4	4	4	2	3	4	4
	158	1		4	2	2	2	2	2	3	2	4	2	1	4	2	2	4	1	3	2	3	4	4	2	2	2	4	1	2	2	2	4	2	2	2	2	4	4	2	4	2	2	4	2	4	1	1	2
	159	1		3	2	1	2	4	4	4	2	2	2	4	4	2	4	4	1	1	1	4	2	4	4	2	4	1	2	2	2	2	2	2	2	2	4	2	2	4	2	2	1	2	4	2	1	4	2
	160	1		2	2	4	2	4	2	2	2	2	2	3	2	1	1	1	2	1	1	4	4	2	2	4	2	4	2	2	4	2	4	4	2	2	1	4	3	4	3	4	1	2	2	4	4	2	3
	161	1		1	1	2	4	3	4	3	2	4	2	1	2	1	2	4	2	4	2	2	3	1	2	2	2	2	2	2	2	1	4	2	1	4	2	2	2	2	2	2	2	4	1	2	1	2	2
	162	1		1	3	2	2	2	2	3	2	2	1	4	4	2	2	4	2	2	2	4	1	1	2	1	4	4	4	2	2	2	4	2	1	2	4	2	2	4	2	1	4	4	4	2	1	4	2
	163	1		2	4	3	1	2	1	3	4	1	3	2	4	2	1	4	2	1	2	2	2	1	4	4	2	4	2	2	2	4	3	4	4	1	2	4	4	1	1	2	2	2	2	1	4	4	4
	164	1		2	1	1	4	2	3	3	1	3	3	2	1	1	1	2	4	4	2	2	1	1	2	4	4	2	2	4	2	1	1	2	4	2	2	3	4	4	2	2	2	2	1	2	4	2	2
	165	1		2	4	4	3	2	4	1	2	2	2	3	4	2	4	2	2	4	2	4	3	2	2	2	4	4	2	2	2	2	1	4	2	2	2	2	2	2	4	2	2	2	1	2	1	2	1
	166	2		4	2	4	2	2	2	2	2	4	4	2	2	4	1	4	2	2	3	2	2	2	2	1	4	2	1	1	4	4	2	2	4	1	2	4	2	2	2	1	4	4	2	4	2	3	2
	167	2		1	4	2	4	3	3	4	2	4	2	1	3	1	1	1	1	1	2	2	3	2	2	2	2	1	1	2	3	2	2	1	3	4	1	2	2	2	2	3	4	4	4	2	4	2	4
	168	2		2	2	2	2	1	4	4	4	3	2	4	2	4	1	2	4	2	2	3	2	4	2	2	2	2	2	2	1	4	2	2	2	2	4	1	4	4	2	2	2	2	1	2	2	2	4
	169	2		2	2	4	4	2	2	3	2	2	2	4	4	4	4	2	1	4	2	1	3	4	4	4	2	2	4	2	2	1	3	2	2	2	2	4	2	4	4	4	2	4	2	4	2	1	4
	170	2		2	4	2	4	1	4	1	2	4	2	2	1	2	1	1	4	2	1	2	2	2	2	1	1	4	1	3	1	2	3	2	4	4	4	2	2	2	4	2	2	2	1	2	4	4	2
	171	2		2	1	2	4	2	2	2	4	2	3	2	2	1	2	4	1	2	2	2	4	2	4	4	1	2	2	4	4	4	1	2	2	4	1	2	4	4	1	2	3	2	3	2	2	4	4
	172	2		2	4	4	2	2	2	4	2	4	4	2	2	2	4	2	2	2	2	4	2	4	4	4	2	2	1	2	4	2	1	2	4	4	4	1	2	2	2	1	2	4	4	2	4	3	2
	173	2		4	4	1	1	3	2	4	2	2	2	1	2	4	1	4	2	4	2	1	2	4	2	2	2	1	1	2	1	2	2	2	4	4	2	4	1	1	2	4	2	4	3	2	3	2	2
	174	2		2	2	4	4	1	4	2	4	2	2	2	2	2	2	4	1	2	1	4	2	4	2	1	2	1	2	2	2	4	4	4	4	4	4	2	2	2	3	2	2	4	2	4	2	2	4
	175	2		2	2	2	4	2	4	2	4	2	2	3	2	2	4	2	4	4	4	2	4	2	2	2	2	2	2	1	4	2	2	1	3	1	2	2	2	2	2	1	2	1	4	4	2	2	4
	176	2		2	3	2	4	4	2	4	2	2	3	1	2	3	2	4	2	2	3	1	2	2	4	2	2	4	2	2	4	2	2	1	2	1	4	2	2	2	1	2	2	2	4	1	4	4	4
	177	2		2	2	4	3	2	4	1	2	2	1	2	2	4	3	2	4	4	2	2	2	2	4	2	2	2	1	4	2	2	2	4	3	4	4	3	4	2	2	1	2	1	4	1	3	1	2
	178	2		2	2	2	4	4	1	2	2	2	2	2	2	2	4	2	4	2	4	4	2	2	2	3	1	2	4	4	3	4	1	2	2	1	1	1	2	2	1	2	3	4	4	4	1	2	2
	179	2		3	2	1	1	2	4	1	1	2	2	2	2	4	2	2	3	2	3	4	3	2	2	2	2	3	2	2	4	2	2	1	2	1	2	4	2	2	1	1	2	4	2	2	2	2	3
	180	2		1	4	2	2	2	4	4	4	2	4	2	3	4	1	2	4	4	2	4	2	2	1	2	4	1	4	4	1	4	2	2	2	4	3	3	2	3	2	3	2	4	2	2	1	2	1
	181	2		2	2	2	2	4	3	4	4	2	1	4	2	2	4	2	4	2	2	2	2	4	2	4	2	2	2	2	2	1	2	4	2	4	2	4	2	2	4	1	1	2	3	4	1	1	4
	182	2		2	2	2	4	1	2	2	2	4	2	4	4	2	2	1	2	2	3	1	2	1	1	2	4	3	1	3	2	4	4	3	2	4	2	1	2	2	4	2	1	1	2	4	2	2	4
	183	2		2	2	2	4	2	2	4	4	2	4	1	2	4	2	2	1	4	2	2	4	1	2	3	4	2	1	4	2	2	1	2	4	2	2	1	3	1	2	2	4	2	2	1	2	2	2
	184	2		2	2	4	1	1	2	4	4	2	1	1	2	4	1	2	4	2	3	2	2	2	2	2	4	2	2	2	4	2	2	4	4	1	2	4	2	4	2	4	1	2	1	4	4	4	3
	185	2		2	2	3	4	2	4	2	2	2	4	2	2	1	2	2	1	1	3	2	2	4	4	4	1	1	2	2	1	4	2	1	4	2	1	2	2	4	1	1	3	2	2	2	1	4	2
	186	2		2	2	2	3	2	2	2	1	4	1	4	2	1	1	4	2	2	2	4	4	4	1	2	1	4	1	2	2	2	1	4	1	4	1	2	3	2	1	4	2	1	2	2	4	1	2
	187	2		4	4	1	1	2	2	2	4	4	3	4	4	4	2	1	2	2	2	2	4	2	3	4	1	3	1	2	2	1	2	2	2	2	2	4	2	2	4	2	2	2	2	1	2	2	2
	188	2		3	2	2	4	1	1	4	4	2	2	2	2	1	1	2	1	2	1	2	4	1	2	2	2	2	4	1	2	1	4	2	1	1	2	4	3	4	1	2	4	2	2	1	4	4	4
	189	2		4	2	1	2	4	1	1	2	4	2	1	2	4	4	2	1	4	4	1	4	3	1	4	4	4	4	4	2	1	2	2	2	2	2	2	1	4	2	2	3	2	4	2	2	2	4
	190	2		4	1	3	1	2	3	2	4	4	4	1	2	4	1	1	2	2	4	2	4	2	2	4	2	4	2	1	2	4	1	4	4	2	2	4	4	2	2	4	2	2	4	4	2	1	2
	191	2		1	4	2	4	4	2	4	4	2	2	1	2	3	1	2	1	2	2	1	1	3	1	2	2	2	2	1	3	1	2	4	2	1	2	4	2	1	2	2	1	2	4	2	4	4	2
	192	2		2	3	2	4	1	2	4	1	4	4	2	1	4	2	1	1	4	4	2	1	4	4	2	1	2	1	2	2	2	1	1	2	2	2	2	4	2	4	2	4	4	4	2	3	2	2
	193	2		1	2	1	1	2	1	1	2	1	2	1	2	1	4	2	1	4	2	2	2	2	2	2	2	2	1	2	2	2	1	4	2	4	2	1	2	2	4	2	4	4	2	1	4	2	4
	194	2		1	3	4	4	2	1	4	2	4	3	4	2	1	1	4	3	2	1	2	2	4	4	1	4	2	2	1	2	2	2	4	4	1	2	4	4	2	2	4	2	4	4	4	2	4	4
	195	2		2	2	4	1	2	2	4	2	1	2	4	2	2	3	2	2	3	2	1	4	2	2	2	4	4	2	4	2	2	4	4	4	3	1	1	3	2	1	2	2	2	2	4	4	1	4
	196	2		4	3	4	2	1	4	4	2	4	4	2	3	4	3	4	2	2	4	1	2	1	4	4	4	4	4	2	2	1	2	2	2	4	4	4	1	4	2	2	2	4	2	2	4	4	2
	197	2		2	4	2	2	2	4	4	2	4	1	2	2	1	2	3	4	1	2	2	4	2	4	2	2	4	2	4	2	4	2	2	4	2	1	2	4	1	4	2	4	1	1	4	4	2	4
	198	2		4	2	4	1	2	2	3	2	2	3	4	4	1	1	2	4	1	1	1	2	2	4	2	2	2	2	2	1	4	2	4	2	2	4	2	4	4	4	2	2	2	2	3	2	2	2
	199	2		1	2	2	2	2	3	2	2	2	4	1	3	1	2	2	1	2	3	1	4	4	2	2	3	2	4	2	4	2	4	2	2	2	3	3	2	2	1	1	4	4	3	2	2	2	2
	200	2		2	2	2	3	2	2	2	4	4	2	4	2	3	2	4	3	4	2	1	4	2	1	2	2	4	2	2	3	1	1	4	4	2	1	2	2	2	2	2	2	4	1	2	3	2	4
	201	2		4	2	2	1	4	2	2	2	3	4	2	4	4	2	1	4	4	4	1	2	1	2	2	1	4	4	2	2	2	2	2	4	2	4	1	2	3	2	2	4	2	2	4	2	4	2
	202	2		1	4	2	4	2	2	4	1	4	2	2	4	2	2	4	4	2	4	4	2	1	2	2	2	4	2	1	4	4	4	1	1	2	2	2	4	4	2	2	4	2	1	2	2	4	1
	203	2		2	2	2	2	4	2	2	4	2	2	3	4	2	4	1	4	2	4	2	3	2	4	1	2	2	4	4	1	4	4	2	2	4	4	2	1	2	4	2	4	4	4	2	1	4	2
	204	2		1	2	2	3	4	4	1	4	4	2	4	4	2	4	2	4	4	2	2	1	3	2	4	4	2	2	1	4	3	4	2	1	2	4	2	2	2	2	2	3	1	3	2	2	4	2
	205	2		2	1	3	2	4	2	2	4	4	2	2	2	1	4	2	2	2	2	3	2	2	2	2	4	4	2	3	4	4	1	3	1	3	4	3	3	4	2	2	4	2	4	2	1	1	3
	206	2		4	2	1	2	2	2	4	2	2	2	2	2	4	2	2	2	1	2	1	1	2	4	1	2	2	1	2	4	2	2	2	4	2	3	2	4	4	4	4	2	2	2	2	2	1	4
	207	2		1	2	4	4	4	2	2	4	2	3	2	2	2	4	1	4	2	4	1	4	2	4	2	1	4	2	1	2	4	2	1	2	4	2	2	2	3	4	4	4	1	2	1	2	4	4
	208	2		1	2	2	2	2	1	2	4	2	2	4	2	4	2	2	2	2	1	1	4	4	2	2	2	4	3	1	4	2	2	4	4	1	2	2	4	4	2	2	2	2	1	3	4	3	4
	209	2		1	1	3	1	4	2	4	4	2	2	1	2	1	2	2	1	2	2	2	1	4	2	1	1	2	1	1	2	1	1	2	2	4	2	3	2	1	2	1	2	2	2	4	4	4	4
	210	2		2	4	4	4	4	4	4	2	2	4	2	2	4	4	2	4	4	2	2	2	4	2	1	2	1	4	2	3	4	4	1	4	2	1	3	4	4	2	1	1	2	2	2	4	2	2
	211	2		4	2	1	4	2	2	2	2	4	4	2	2	2	1	2	2	2	2	3	1	4	2	4	4	1	3	2	4	2	3	4	2	4	4	4	1	4	2	2	2	2	2	1	2	2	4
	212	2		2	3	1	2	2	4	1	2	2	3	4	1	1	2	4	4	1	2	2	4	2	4	3	4	1	2	4	4	4	4	4	1	4	4	2	2	2	2	2	2	2	2	2	2	4	2
	213	2		2	4	1	2	3	2	2	2	1	4	4	1	1	4	2	3	1	1	3	4	2	4	2	4	2	2	2	2	1	4	4	1	3	4	4	2	2	4	4	2	4	3	2	2	4	2
	214	2		2	2	4	4	1	1	4	4	2	4	4	1	2	2	2	2	3	4	4	2	2	2	2	3	2	3	2	2	4	2	4	4	2	4	2	2	2	4	2	2	2	4	1	2	3	1
	215	2		1	2	2	4	2	1	2	2	2	1	2	2	4	1	4	4	4	4	1	2	3	4	2	4	1	2	4	4	2	2	2	2	2	2	2	2	2	3	2	2	2	4	1	2	1	2
	216	2		4	2	4	2	2	2	1	2	1	1	4	2	2	2	2	2	2	2	1	4	2	3	2	2	2	4	1	2	4	2	2	4	4	2	1	3	2	2	2	1	2	2	2	1	4	2
	217	2		2	4	3	2	2	4	4	1	4	3	1	4	2	4	2	1	2	2	4	2	2	1	2	1	2	2	2	3	1	3	4	1	4	3	4	2	2	2	2	2	2	4	2	1	3	2
	218	2		2	2	4	4	2	4	2	2	2	2	2	2	2	1	4	2	2	4	2	2	2	2	2	2	2	2	2	2	4	3	3	2	1	1	2	2	2	4	2	2	2	2	2	3	2	2
	219	2		1	1	4	4	4	2	1	4	4	4	1	2	2	1	2	2	3	2	4	4	4	2	1	4	2	2	1	3	1	4	2	2	2	1	2	2	2	2	3	1	2	4	4	2	4	2
	220	2		2	4	2	2	2	2	2	4	2	2	4	2	2	2	4	4	3	4	2	2	2	4	2	2	4	4	4	2	2	1	2	2	4	3	4	4	4	2	3	2	2	3	2	2	2	1
	221	2		2	4	2	1	3	2	2	1	2	2	2	4	4	2	2	1	2	4	1	3	2	4	3	2	4	2	2	4	4	2	2	4	2	2	4	2	2	4	2	2	4	2	2	4	2	4
	222	2		1	3	4	2	2	4	1	2	4	2	2	2	4	1	4	4	3	1	2	3	4	1	2	2	2	1	2	1	2	1	1	4	4	2	4	4	4	1	1	2	2	4	1	1	2	2
	223	2		4	2	1	2	4	2	2	1	4	2	1	2	3	2	2	4	2	1	2	2	2	2	2	3	2	3	4	4	2	4	2	3	4	4	3	4	2	2	2	3	1	1	1	4	4	1
	224	2		1	4	4	3	4	1	1	4	4	2	1	2	2	2	4	2	2	2	1	4	2	2	1	3	4	2	4	1	2	4	2	4	2	2	2	3	4	2	2	1	2	4	2	1	4	2
	225	2		2	3	2	1	1	2	2	2	4	3	2	3	2	1	2	4	4	3	4	3	4	2	4	4	1	2	1	1	2	4	4	2	1	4	2	4	1	4	4	4	4	2	4	4	4	4
	226	2		1	2	3	2	4	1	2	2	2	4	4	2	1	2	2	4	2	4	2	4	2	1	2	2	2	4	2	2	2	4	2	4	4	2	4	1	1	2	2	1	2	4	2	2	2	2
	227	2		2	1	2	3	1	4	4	2	2	4	4	4	4	4	2	2	2	4	2	2	2	4	2	2	2	2	4	3	4	2	4	2	2	4	1	4	2	2	3	4	2	4	2	2	4	3
	228	2		4	2	4	4	4	2	1	2	2	4	1	2	2	2	2	2	4	4	2	2	2	4	4	3	2	1	2	4	2	1	1	2	2	4	2	1	2	2	4	4	2	2	2	2	4	4
	229	2		4	2	4	2	4	1	2	2	2	2	4	2	4	2	1	4	2	2	2	4	4	4	2	4	2	2	2	4	4	2	2	2	1	1	4	4	4	3	1	4	2	2	1	1	1	4
	230	2		1	2	2	2	3	2	1	1	2	1	2	3	4	2	1	3	2	1	2	2	2	2	4	4	2	2	2	2	2	4	2	1	3	4	2	4	4	2	1	2	2	4	3	1	2	2
	231	2		2	2	4	2	2	4	3	1	4	4	2	2	4	2	4	4	4	2	3	2	1	2	2	3	1	4	2	2	4	1	4	1	2	4	4	2	4	2	2	4	2	1	4	4	1	2
	232	2		1	1	2	2	1	2	4	2	2	1	4	1	4	2	2	4	4	4	4	3	4	2	2	4	4	4	2	2	3	4	1	2	4	2	2	1	4	4	2	4	1	4	2	2	2	4
	233	2		2	4	2	4	4	2	2	2	3	2	2	4	4	2	2	2	2	1	2	3	1	4	1	4	4	2	2	1	2	2	1	4	1	2	1	2	4	1	4	2	2	3	1	1	2	1
	234	2		2	1	2	2	2	2	1	2	2	1	2	2	2	2	4	2	1	3	2	2	1	2	2	2	2	1	1	2	4	4	2	4	1	2	3	2	2	2	2	1	3	4	2	2	3	2
	235	2		4	4	2	4	3	1	1	2	1	4	2	4	4	4	2	2	4	1	2	2	2	1	4	4	1	2	3	2	2	2	2	2	1	2	4	2	2	2	1	2	2	1	1	4	1	2
	236	2		2	2	2	1	4	1	4	1	4	3	2	4	2	4	1	1	2	3	4	2	2	4	4	2	4	2	4	2	2	3	1	2	3	4	2	2	2	4	2	4	2	3	4	4	4	2
	237	2		2	1	4	2	4	2	4	2	2	1	2	4	2	4	4	3	4	4	2	1	2	2	2	2	1	2	2	2	2	2	1	2	4	3	4	1	1	4	2	2	2	4	4	1	1	2
	238	2		2	4	4	2	4	2	3	4	1	2	4	4	2	4	1	2	4	2	2	3	2	3	2	4	2	2	4	2	3	2	2	1	1	4	2	2	4	2	2	4	1	3	3	4	4	2
	239	2		2	2	4	2	3	2	1	2	1	2	2	3	1	2	2	1	2	4	2	4	2	2	2	2	4	1	2	2	2	2	4	3	2	2	3	2	2	1	4	1	3	4	2	1	1	4
	240	2		2	2	2	2	4	4	4	2	2	2	1	4	2	2	1	1	4	2	4	2	2	4	4	4	2	4	2	1	1	4	1	2	2	2	1	2	1	2	2	2	4	1	2	1	4	4
	241	2		4	4	1	4	2	3	4	2	4	4	2	4	4	3	1	1	2	2	2	3	4	2	4	2	4	4	2	2	2	3	2	1	2	3	4	2	2	2	2	2	1	1	2	1	4	4
	242	2		4	3	2	4	4	3	2	4	4	2	2	2	4	2	2	2	2	2	4	1	2	1	2	2	4	4	2	2	1	2	2	2	1	2	2	4	2	2	2	4	4	2	2	3	3	2
	243	2		2	4	2	2	2	2	2	2	4	2	2	4	2	4	2	4	1	1	2	1	1	2	2	2	2	2	3	4	4	2	2	4	2	2	2	2	2	2	2	3	2	1	4	4	1	2
	244	2		2	4	2	3	1	1	4	2	2	2	4	2	4	4	2	4	3	2	2	2	4	3	2	4	2	1	1	4	1	1	4	1	1	4	1	2	4	1	2	2	1	3	4	1	2	1
	245	2		2	2	2	3	1	4	2	2	4	4	2	2	2	2	2	2	1	4	2	4	4	4	4	4	2	1	4	2	4	2	4	4	2	2	2	4	4	2	4	2	2	1	4	2	4	1
	246	2		2	2	4	4	4	3	4	2	2	4	2	1	4	2	2	4	2	1	4	2	4	2	1	2	2	3	2	2	2	2	3	2	3	3	4	4	4	1	3	4	1	2	2	2	4	2
	247	2		2	2	2	2	1	4	1	1	2	4	1	3	2	2	2	2	3	1	2	2	4	1	4	2	3	2	2	4	4	2	1	4	2	4	2	2	4	1	2	4	2	4	4	2	2	2
	248	2		2	2	2	2	4	2	2	4	4	4	2	2	4	2	4	2	4	2	2	2	4	2	4	2	2	1	1	2	4	4	2	4	2	2	2	4	4	2	2	2	4	2	2	2	1	2
	249	2		2	2	2	2	4	4	2	2	1	2	2	2	4	2	3	4	4	4	4	4	4	2	2	2	4	4	1	4	2	1	2	1	2	2	2	4	2	2	3	4	4	2	1	2	1	2
	250	2		4	4	2	4	2	1	4	2	1	4	2	4	1	2	4	4	4	2	3	4	2	4	2	1	1	2	1	4	4	4	2	3	2	3	2	2	4	1	2	3	2	1	1	4	2	2
	251	2		4	2	4	1	2	4	4	3	4	2	4	1	2	2	2	3	2	2	2	4	1	2	4	2	2	3	4	2	2	1	4	4	4	2	1	2	4	3	4	2	2	3	2	1	4	4
	252	2		4	1	4	4	3	2	2	4	4	4	2	2	2	4	4	2	1	4	1	2	1	2	2	2	2	2	2	2	4	4	2	4	4	1	4	2	4	4	2	4	4	2	2	1	2	4
	253	2		4	2	2	4	4	2	2	2	1	4	3	4	2	1	2	2	4	1	3	2	4	2	4	4	2	4	2	4	4	3	2	2	1	2	1	2	4	4	1	2	2	1	2	2	2	2
	254	2		2	2	2	2	1	2	2	1	1	1	4	4	2	2	2	4	2	1	2	2	4	1	2	4	2	1	4	4	4	2	4	2	2	4	4	2	3	2	2	4	2	2	2	4	4	1
	255	2		1	2	2	4	1	2	2	1	2	3	3	2	4	1	4	1	1	2	2	4	4	2	4	4	4	3	4	2	4	2	4	2	1	1	2	4	2	3	2	4	3	2	1	2	4	2
	256	2		2	2	2	4	4	3	2	2	4	1	4	4	2	2	3	3	3	2	2	2	2	2	4	2	1	4	3	1	2	2	4	2	1	4	2	2	2	2	3	4	4	1	4	2	3	4
	257	2		1	2	1	2	2	2	4	4	1	2	2	4	4	4	2	1	2	2	2	1	4	1	2	4	2	2	2	4	2	2	2	3	1	3	4	2	1	2	4	2	3	2	2	2	2	4
	258	2		3	1	1	2	2	1	2	2	4	4	2	2	4	4	2	1	4	4	4	1	1	3	3	2	2	4	2	1	4	2	1	2	4	2	4	2	4	1	3	2	4	1	2	2	4	4
	259	2		4	3	1	4	1	1	2	2	3	2	1	1	2	4	2	2	4	2	2	4	2	1	2	2	3	1	4	3	4	4	4	1	4	2	1	1	1	3	4	4	1	2	4	2	1	2
	260	2		4	1	4	1	4	2	2	4	1	3	2	1	2	2	4	1	2	2	2	2	2	2	2	1	2	2	3	2	1	1	4	4	2	3	2	1	4	4	4	4	2	4	4	1	4	2
	261	2		2	2	4	1	2	4	2	4	2	4	2	4	2	4	1	4	2	2	4	4	4	4	2	2	1	2	4	4	4	2	2	3	4	4	2	2	2	4	4	1	1	2	2	4	2	2
	262	2		2	2	2	4	2	2	2	1	3	4	3	2	1	2	4	1	2	3	2	2	4	2	4	2	4	4	4	2	3	2	2	2	2	4	2	2	2	1	4	4	2	4	2	2	2	2
	263	2		2	2	1	4	4	4	2	3	2	3	4	1	1	4	4	2	4	4	2	2	1	4	4	2	1	4	2	4	4	1	2	4	3	1	4	4	4	2	2	2	4	1	2	2	4	4
	264	2		2	2	4	1	2	2	2	1	4	4	4	2	3	1	2	2	2	2	2	2	2	2	4	2	2	1	1	2	2	2	4	2	2	4	1	2	2	2	2	2	2	2	4	1	2	2
	265	2		2	2	1	2	2	4	2	4	2	2	2	1	3	1	2	2	4	4	2	2	4	4	2	4	4	2	3	4	2	3	2	2	2	2	4	2	4	3	2	1	4	4	1	4	2	2
	266	2		2	2	1	4	4	3	3	1	4	2	2	4	3	4	1	2	1	2	3	2	4	4	2	1	4	2	2	4	1	2	1	1	4	2	2	4	4	4	3	4	1	2	2	3	2	1
	267	2		2	4	2	2	2	1	3	4	2	1	2	2	1	4	1	4	2	2	1	4	2	4	4	4	2	2	4	4	1	4	1	2	1	2	1	4	2	2	2	1	4	2	4	1	4	4
	268	2		4	4	4	2	4	2	4	2	2	1	2	3	2	2	2	4	2	1	2	3	2	2	2	1	4	2	2	2	2	2	2	1	2	2	3	2	4	2	2	4	2	4	1	2	2	3
	269	2		2	2	2	2	4	2	2	4	2	2	2	2	4	4	2	4	1	1	1	2	2	2	1	4	2	1	1	4	3	4	4	2	2	2	1	1	3	2	2	4	2	1	2	2	2	4
	270	2		4	2	2	2	2	2	4	3	2	2	4	4	3	2	1	4	2	2	1	4	4	1	4	4	1	2	2	2	2	1	1	2	3	2	2	2	2	2	2	2	2	2	4	2	2	2
	271	2		4	2	1	4	2	2	2	1	2	2	4	4	1	2	2	4	2	2	2	4	3	1	3	2	4	2	4	4	2	2	2	1	2	4	2	2	1	2	2	4	4	2	2	2	2	4
	272	2		4	4	1	2	1	4	3	2	4	2	4	2	2	4	2	4	4	4	1	3	1	2	4	4	2	1	2	3	1	2	1	1	2	2	4	2	2	2	2	1	2	1	2	3	1	1
	273	2		2	2	2	2	2	4	2	4	4	2	2	4	1	2	2	2	4	2	4	4	4	4	2	2	2	4	2	4	2	2	2	4	4	2	1	4	4	4	2	2	4	4	4	1	2	2
	274	2		4	4	2	2	4	4	2	4	1	1	2	2	2	2	4	3	2	2	4	2	2	2	4	2	4	2	2	2	2	2	2	1	2	2	2	3	4	2	2	2	4	2	1	1	2	3
	275	2		3	4	2	2	4	4	4	2	4	1	2	4	2	4	2	2	2	2	4	1	4	2	2	4	1	2	2	2	1	2	4	2	2	4	4	2	2	4	4	2	3	2	2	2	2	4
	276	2		4	4	4	4	4	4	1	3	2	2	4	2	1	4	4	3	1	2	2	2	1	1	2	4	4	1	1	4	2	4	4	1	1	2	1	1	1	2	4	4	4	2	2	2	2	2
	277	2		1	4	2	4	4	2	2	2	1	4	2	2	1	4	4	4	4	2	4	1	1	2	2	2	2	4	4	4	2	2	2	1	4	2	2	2	2	2	3	4	2	2	1	3	1	1
	278	2		3	2	4	2	2	2	4	2	4	4	1	3	2	2	2	4	1	2	4	3	2	4	2	4	4	2	2	2	4	4	2	2	2	4	2	1	2	1	4	2	2	2	4	4	4	2
	279	2		3	2	4	2	4	4	3	2	2	2	2	1	2	4	2	4	1	3	4	1	4	2	4	2	2	2	4	2	1	2	4	1	2	4	1	2	2	4	4	2	4	2	2	2	4	1
	280	2		2	2	2	2	1	2	1	2	2	3	4	2	3	2	2	2	1	2	4	2	2	4	4	2	4	4	2	2	2	2	2	4	2	4	2	2	2	1	2	4	2	4	2	2	1	2
	281	2		2	2	2	4	2	2	3	1	2	3	3	2	2	3	4	4	3	2	2	4	1	1	2	1	2	1	4	2	4	2	2	2	2	2	2	2	4	1	1	4	4	4	2	2	4	2
	282	2		2	4	2	4	4	4	2	2	4	2	2	2	4	2	1	4	1	4	2	1	4	2	2	4	2	2	2	4	4	4	2	4	2	3	2	2	2	4	4	2	1	2	4	2	2	2
	283	2		2	2	2	4	2	4	2	4	2	4	2	4	4	2	4	3	2	4	2	1	4	2	3	2	2	4	4	4	2	1	4	3	2	4	4	4	1	1	4	4	4	2	4	2	4	2
	284	2		2	4	2	3	4	4	4	3	2	4	4	4	1	4	2	4	2	2	4	3	2	4	2	2	1	4	3	4	4	2	2	2	2	2	4	4	4	1	2	1	1	3	3	4	1	4
	285	2		2	2	2	2	2	2	4	4	4	2	2	4	1	4	4	2	4	2	2	4	1	4	1	1	4	1	2	2	3	1	4	2	1	4	2	4	2	2	2	3	4	2	1	2	4	2
	286	2		1	1	2	2	4	2	2	2	4	3	2	2	4	4	2	2	4	1	4	1	2	4	4	1	1	4	2	4	4	4	2	4	4	2	2	2	2	2	2	1	4	4	2	1	2	2
	287	2		4	4	3	2	4	2	2	2	2	2	2	2	2	4	3	1	4	2	2	4	2	4	2	4	2	1	2	1	2	4	4	4	2	2	2	4	2	2	4	4	2	1	4	1	2	2
	288	2		2	4	2	2	2	2	2	2	2	4	2	4	2	4	1	2	4	4	2	4	2	2	3	4	1	2	4	2	4	1	1	2	4	2	2	4	4	2	3	1	4	4	1	2	3	4
	289	2		3	4	4	4	3	3	3	3	1	2	1	2	2	2	2	4	2	2	2	2	4	4	2	2	2	2	4	2	2	4	3	1	4	4	4	2	1	4	2	2	2	1	4	4	3	4
	290	2		2	4	2	4	2	4	4	2	4	2	2	2	2	4	2	4	1	2	4	4	2	2	4	4	4	2	4	2	2	4	2	3	1	2	4	2	3	2	2	4	4	4	2	1	3	2
	291	2		1	2	2	2	3	2	4	4	4	4	1	1	4	4	4	4	3	4	3	2	2	4	1	3	2	2	2	2	1	4	2	3	2	2	2	3	2	2	2	2	4	4	2	2	2	2
	292	2		2	1	2	2	4	2	2	1	4	3	4	1	4	4	4	2	1	3	4	1	4	4	1	2	4	2	2	4	2	2	2	2	4	4	1	4	4	2	2	2	2	2	1	4	2	2
	293	2		2	4	3	2	4	1	4	2	4	4	4	1	4	4	4	4	2	1	2	4	2	3	1	4	2	2	2	2	4	1	2	2	2	2	2	1	4	4	4	4	2	2	4	4	2	4
	294	2		2	1	2	2	4	2	2	4	1	2	2	4	2	2	2	2	4	2	2	2	4	2	4	2	2	4	3	4	2	4	1	2	2	4	1	4	2	2	2	2	4	4	4	4	4	1
	295	2		1	4	2	2	4	2	4	4	2	2	2	3	3	4	4	4	2	4	1	4	2	2	3	4	1	2	4	4	4	2	3	2	1	3	2	2	2	1	2	4	4	2	2	1	4	3
	296	2		2	1	2	4	2	1	3	2	2	4	1	2	2	2	1	4	4	2	3	2	4	4	2	3	2	3	2	2	2	2	3	2	2	2	2	4	4	4	2	1	1	2	4	4	2	4
	297	2		4	2	4	2	2	2	4	2	1	4	4	2	2	2	2	1	4	3	4	1	2	2	4	2	4	2	2	2	4	4	1	2	1	1	2	2	1	4	2	2	2	2	2	2	2	2
	298	2		2	2	2	1	4	4	4	3	1	2	2	2	2	4	4	2	2	2	4	1	2	4	4	4	2	4	4	2	4	4	2	1	2	1	2	1	2	4	1	3	1	1	1	1	2	1
	299	2		4	4	2	1	4	4	2	2	2	1	1	4	1	4	4	2	1	4	2	4	2	1	2	2	2	2	4	1	1	3	1	2	2	2	2	2	2	1	2	2	2	2	4	2	2	4
	300	2		4	1	3	2	4	4	1	1	2	4	4	2	4	2	4	2	1	4	4	1	2	1	4	2	2	4	4	2	2	2	2	2	2	2	4	2	4	2	3	3	4	2	1	2	2	2
	301	2		4	2	4	1	2	4	2	2	2	2	3	2	4	2	2	2	2	3	2	2	2	4	1	1	4	4	4	4	4	2	2	4	2	2	1	2	4	3	4	4	1	1	4	2	2	2
	302	2		1	4	2	2	2	1	2	2	2	2	4	2	4	2	2	1	3	2	1	2	4	4	4	2	2	4	2	2	2	2	4	4	1	2	4	4	2	3	3	1	3	2	2	1	1	1
	303	2		2	4	2	4	2	4	1	1	1	1	4	2	2	4	4	4	2	4	4	1	4	4	4	2	2	1	4	4	4	4	2	1	2	4	2	2	2	2	4	4	2	2	2	2	4	2
	304	2		1	2	2	2	2	1	2	2	4	3	4	2	2	2	1	2	4	4	2	2	1	2	2	1	2	4	4	2	2	1	1	4	4	4	2	2	4	4	2	4	4	2	1	4	3	3
	305	2		2	4	1	4	2	2	2	2	4	4	2	2	2	1	2	3	4	4	2	2	3	2	2	2	2	3	2	1	2	1	4	2	2	4	4	2	2	1	4	2	2	4	2	2	1	1
	306	2		2	2	2	4	2	2	4	2	4	4	4	2	2	2	1	2	1	1	3	4	4	2	4	2	2	2	2	4	2	4	2	2	4	2	2	2	2	2	2	4	2	1	2	2	2	4
	307	2		2	4	2	2	3	4	2	2	4	4	2	1	4	4	1	4	2	1	4	1	2	2	2	4	4	4	4	2	4	2	2	2	2	1	4	4	2	4	4	4	2	4	3	4	4	2
	308	2		1	4	4	2	1	4	2	2	4	2	1	4	4	2	4	4	4	2	1	4	4	2	4	1	2	2	2	3	1	2	2	2	3	4	3	2	4	4	1	4	2	4	4	1	2	4
	309	2		1	3	1	4	4	2	2	2	1	4	2	2	2	2	2	4	2	2	2	1	4	2	4	2	2	4	2	2	1	4	1	4	3	3	4	2	4	2	2	1	3	1	2	4	2	3
	310	2		2	4	2	4	4	4	2	4	2	2	2	2	2	1	2	4	2	4	4	1	2	2	2	2	2	2	4	2	4	1	4	2	2	3	1	2	4	1	3	2	4	4	4	4	2	4
	311	2		2	2	1	2	2	4	2	2	4	2	3	2	3	3	4	2	2	3	3	3	4	2	2	2	1	2	4	2	3	1	2	1	2	2	4	4	2	1	2	4	4	3	4	4	2	2
	312	2		3	2	2	1	4	1	4	1	3	1	4	4	4	3	4	2	2	2	4	4	1	2	3	2	2	2	2	2	2	2	4	4	2	2	2	4	2	1	2	2	1	4	2	2	2	2
	313	2		1	2	2	1	4	4	4	4	4	2	2	4	4	4	4	4	2	2	4	1	4	4	4	4	4	2	2	2	2	4	2	3	4	4	1	2	2	3	4	4	2	4	4	2	2	4
	314	2		1	3	2	4	3	4	2	2	2	4	1	2	2	4	1	1	3	4	4	3	1	2	1	4	2	2	3	4	1	4	1	2	4	1	2	2	4	1	2	4	4	4	2	3	4	2
	315	2		1	3	3	3	3	2	4	4	2	1	2	4	2	1	4	4	1	4	2	4	4	2	4	4	2	3	2	4	1	3	3	4	1	2	2	4	1	1	4	4	4	1	4	1	2	1
	316	2		4	2	2	2	1	4	4	2	4	2	2	3	2	1	2	2	1	4	4	4	3	1	4	2	2	2	2	3	2	1	4	2	2	4	3	1	4	4	2	2	2	2	1	2	2	1
	317	2		4	4	2	2	4	4	1	2	2	4	4	2	1	2	1	3	4	2	2	1	4	2	2	2	4	1	2	4	4	2	2	3	4	2	2	4	2	4	1	2	1	1	2	3	2	4
	318	2		4	2	2	1	2	2	4	4	4	2	2	4	4	1	2	4	1	4	1	2	4	4	1	2	4	2	4	3	2	2	4	4	2	2	3	4	4	1	2	4	2	2	1	2	4	2
	319	2		2	2	2	4	2	2	2	1	1	3	4	2	3	2	2	2	2	4	2	1	2	2	2	2	2	2	2	4	2	2	2	4	2	1	2	2	4	2	3	2	2	2	2	4	4	2
	320	2		1	2	4	1	1	2	3	2	3	2	1	4	2	4	4	2	1	2	1	2	4	2	2	2	1	4	2	2	2	2	4	4	1	2	4	4	4	4	2	1	4	2	2	4	4	2
	321	2		4	2	4	1	2	4	2	1	4	1	4	2	2	2	4	2	2	2	1	2	4	2	3	4	4	2	4	1	1	2	3	2	4	2	4	1	2	4	2	4	2	1	2	4	2	4
	322	2		4	4	4	4	2	2	4	4	2	2	2	2	4	2	1	2	1	4	2	1	2	2	2	4	2	2	2	2	3	2	1	3	4	2	1	2	1	2	3	1	2	2	4	1	2	2
	323	2		2	2	3	2	2	1	2	2	2	1	2	2	4	4	1	4	1	4	1	4	2	4	4	2	4	4	2	4	2	4	2	1	4	4	2	2	2	2	1	2	2	2	2	1	1	4
	324	2		2	2	2	1	4	2	4	4	4	4	3	4	2	1	4	1	2	3	4	2	4	4	2	2	2	2	4	4	2	2	1	2	2	4	2	2	2	3	4	4	4	2	2	2	2	3
	325	2		1	2	2	4	2	1	3	4	2	1	1	2	4	4	2	2	4	3	2	4	2	4	2	4	2	2	2	2	2	2	2	2	1	4	1	2	1	4	2	1	2	4	2	1	2	4
	326	2		3	4	2	1	4	2	2	4	4	4	2	1	2	2	2	4	4	2	2	4	1	3	4	4	4	4	2	2	4	1	2	2	1	2	3	2	2	1	1	4	2	3	2	2	4	2
	327	2		3	2	4	2	2	1	3	2	2	4	1	2	1	2	2	2	2	4	2	4	2	1	4	2	2	2	1	1	1	2	3	2	4	2	2	2	3	4	4	4	1	2	4	4	4	2
	328	2		4	1	1	4	2	4	2	2	2	2	4	4	4	2	2	2	2	4	1	2	4	2	2	1	2	1	2	2	4	2	3	4	2	4	2	2	4	1	4	4	2	1	2	2	1	1
	329	2		3	2	4	4	2	1	1	2	1	2	2	4	3	2	4	4	2	2	1	2	2	2	2	2	2	2	1	1	1	1	2	2	3	4	1	2	2	1	4	2	2	4	4	2	2	2
	330	2		1	2	2	2	2	2	2	2	2	2	2	1	4	2	4	4	2	2	2	2	2	2	2	3	2	2	1	2	4	4	4	2	4	2	2	2	1	2	2	2	1	4	3	2	4	4
	331	2		4	4	4	2	2	4	4	2	1	4	4	1	1	4	3	1	1	4	2	1	1	4	4	2	2	4	1	2	2	3	4	4	2	1	2	1	2	3	2	2	4	4	1	2	1	4
	332	2		2	2	2	2	2	2	3	4	4	1	2	1	4	2	2	2	4	2	4	2	2	4	4	4	3	4	2	1	2	1	4	2	4	2	2	2	2	2	1	2	2	4	4	2	3	1
	333	2		2	2	1	4	2	4	2	4	2	2	2	2	2	2	4	4	2	2	4	2	4	4	2	4	4	2	2	2	2	2	4	2	2	2	2	2	1	4	4	2	2	3	2	4	3	2
	334	2		4	3	2	4	2	2	2	2	4	4	4	2	4	3	2	2	1	4	3	2	1	2	1	2	3	2	1	2	2	2	4	4	2	3	3	2	2	4	1	4	4	4	2	1	1	1
	335	2		4	4	1	4	2	2	2	1	4	2	2	4	4	2	2	2	2	1	2	4	1	4	2	4	2	2	4	2	4	2	4	4	1	4	2	1	2	4	2	2	2	4	2	4	2	3
	336	2		1	2	2	2	2	4	2	4	4	2	2	2	2	2	4	2	4	4	4	2	4	2	2	4	2	2	4	2	2	4	2	4	2	2	4	4	2	2	3	2	4	4	2	1	2	1
	337	2		2	2	1	4	1	4	4	3	4	2	2	2	1	4	2	2	4	2	2	1	1	1	2	1	3	4	4	2	2	4	3	2	4	4	2	3	3	4	2	2	2	3	2	4	4	2
	338	2		4	2	2	4	4	1	4	2	3	4	4	2	3	2	4	2	4	1	4	4	2	2	4	2	2	2	2	2	4	2	4	2	4	2	1	1	2	1	1	2	2	2	2	2	4	3
	339	2		4	1	2	4	4	4	2	4	2	2	2	2	2	2	1	4	2	1	4	4	2	3	4	2	2	2	4	2	4	1	4	4	2	4	1	2	4	2	1	2	1	1	2	2	2	3
	340	2		4	2	4	4	2	4	2	4	2	2	2	2	2	2	2	2	3	2	4	4	1	4	2	4	2	2	4	1	3	2	1	2	4	2	4	4	4	3	2	2	4	4	4	4	2	4
	341	2		2	2	3	1	2	1	2	2	2	3	1	1	2	2	2	4	4	2	4	3	2	2	4	2	3	4	4	4	2	2	4	2	4	2	3	4	4	2	2	4	4	4	2	2	2	4
	342	2		2	2	2	2	2	1	2	2	4	4	4	2	3	1	1	1	2	2	4	4	4	2	2	1	1	2	2	2	2	2	3	1	2	2	4	2	4	4	1	2	4	2	2	4	4	4
	343	2		4	3	2	4	2	2	4	4	2	2	3	2	2	2	1	3	4	2	4	4	2	2	4	4	1	3	3	1	4	4	1	4	4	4	2	1	4	2	2	2	4	3	1	2	2	2
	344	2		3	4	4	2	1	2	2	2	2	2	4	2	4	2	2	2	2	4	2	2	2	2	1	2	4	4	3	1	2	1	2	2	3	4	4	1	2	4	4	4	4	3	2	3	2	1
	345	2		2	4	2	2	2	2	4	1	1	2	2	2	2	4	4	4	1	2	1	1	2	2	2	2	2	3	2	2	4	1	2	3	4	4	1	3	1	2	4	4	2	2	1	2	2	2
	346	2		2	2	4	1	1	4	4	3	2	2	2	2	4	1	4	3	3	2	2	2	2	2	2	2	2	2	4	4	2	2	2	1	2	2	3	2	2	2	2	2	4	4	2	2	2	4
	347	2		3	2	2	4	4	2	2	2	2	2	2	1	4	1	4	2	4	2	2	1	4	2	2	1	3	2	2	3	4	4	1	2	2	2	2	3	2	4	1	4	1	4	3	2	4	2
	348	2		4	1	2	4	2	4	4	1	1	1	2	1	4	1	4	4	2	2	1	1	4	4	1	2	2	2	2	4	4	3	1	4	2	1	1	1	2	4	4	2	2	2	4	1	2	4
	349	2		4	1	4	4	4	2	1	2	2	2	4	2	2	2	2	2	4	2	3	2	1	2	2	1	2	4	2	4	4	4	3	2	4	4	1	2	4	2	4	2	2	4	2	2	4	4
	350	2		2	2	2	2	4	1	1	4	2	2	2	2	2	2	1	2	2	4	1	4	4	1	4	3	1	4	4	4	2	4	2	1	2	2	2	2	2	4	4	1	4	3	2	4	4	1
	351	2		2	2	4	2	2	1	2	2	4	2	2	4	2	1	4	3	3	4	2	2	1	2	2	2	2	1	2	2	1	1	2	4	1	2	4	1	3	2	1	2	1	4	2	2	3	1
	352	2		4	2	1	2	2	4	2	2	1	1	2	3	4	2	2	4	2	4	2	2	1	2	1	1	2	4	1	2	2	2	2	2	4	4	4	2	4	2	2	2	4	4	2	2	4	2
	353	2		1	2	2	4	2	2	1	2	2	4	4	4	2	2	2	2	4	1	2	4	2	2	2	3	2	4	2	3	3	2	2	2	2	4	2	3	2	2	4	4	2	2	2	2	1	2
	354	2		2	2	3	1	4	2	1	2	2	2	2	2	3	2	1	4	4	4	2	2	2	2	2	4	2	1	2	2	4	4	4	4	2	2	2	4	4	2	2	4	2	4	4	3	4	1
	355	2		4	2	2	2	2	2	1	2	2	2	2	2	2	3	4	3	2	4	4	2	1	1	2	2	2	2	2	1	1	2	4	4	2	4	2	2	2	2	2	2	1	1	1	4	2	4
	356	2		3	4	2	1	2	2	2	1	4	1	4	4	2	1	2	4	2	2	1	2	2	2	1	4	2	4	2	2	2	2	4	2	2	2	2	2	2	4	4	4	4	2	2	2	1	1
	357	2		2	2	2	2	2	4	4	4	4	1	2	1	2	2	1	2	1	4	4	2	1	2	4	2	1	4	2	1	4	2	2	2	4	1	2	4	2	2	3	1	2	1	3	1	4	2
	358	2		1	2	2	4	1	2	2	2	2	3	4	4	2	4	2	2	2	2	2	4	1	4	2	3	1	2	1	2	2	3	3	4	1	3	2	2	4	1	2	3	2	2	2	1	2	2
	359	2		2	4	4	4	4	4	2	4	2	2	2	1	2	2	1	2	2	1	2	1	1	1	4	4	2	2	3	2	4	2	2	4	2	2	3	4	4	4	4	4	2	2	1	4	2	4
	360	2		1	4	2	1	4	4	2	2	2	1	1	2	2	4	1	1	1	4	4	2	4	2	2	2	2	2	4	4	2	2	2	2	2	2	2	4	2	1	1	2	4	4	4	4	4	3
	361	2		2	3	2	4	2	2	2	4	4	2	2	2	2	4	1	2	1	2	2	4	2	2	2	2	4	4	4	1	2	2	4	2	2	1	4	4	2	2	1	2	4	2	2	2	2	2
	362	2		2	1	2	4	2	2	4	4	2	2	1	2	2	3	4	2	2	1	2	4	3	4	4	2	4	3	3	2	2	4	4	2	2	2	4	2	4	1	4	4	2	2	4	4	2	2
	363	2		4	4	4	4	4	4	2	2	4	1	2	4	4	3	2	3	2	1	4	1	1	2	1	1	4	2	4	1	1	2	2	2	4	4	2	1	2	4	2	4	2	4	1	4	1	1
	364	2		3	1	1	2	4	4	2	1	2	1	1	2	2	4	2	4	4	4	2	1	1	2	1	4	2	2	4	2	2	4	2	4	1	3	4	4	4	2	2	1	4	2	1	1	3	2
	365	2		4	4	4	2	1	2	2	4	4	1	4	4	2	2	4	4	4	2	4	4	2	4	4	4	2	1	4	2	3	4	2	2	2	3	2	2	2	4	2	4	2	2	4	2	2	4
	366	2		2	2	2	2	2	4	2	4	2	4	2	4	2	2	3	2	1	4	2	4	4	4	4	4	4	4	2	2	4	3	3	2	4	4	2	2	1	3	2	2	3	2	2	2	2	2
	367	2		2	1	2	4	2	2	2	3	1	2	1	4	4	2	2	3	4	4	4	1	2	1	1	2	4	4	4	4	4	1	4	2	2	2	2	2	4	2	2	2	1	3	4	2	2	2
	368	2		4	2	2	4	4	3	4	2	2	4	4	4	2	2	2	2	2	4	4	4	4	4	2	1	2	1	4	4	1	2	2	4	1	4	1	2	4	4	2	4	2	4	2	4	2	4
	369	2		1	1	2	1	2	4	2	2	4	4	2	2	4	2	3	4	4	2	4	2	2	2	4	1	4	4	4	1	1	2	2	2	4	2	2	4	4	1	1	2	4	1	2	1	2	1
	370	2		4	4	4	2	4	1	2	4	4	2	4	2	2	1	2	1	1	2	2	4	1	2	2	4	4	1	2	2	2	4	2	4	1	2	4	2	2	2	4	4	4	2	2	2	2	4
	371	2		2	2	2	3	2	3	2	4	4	2	2	2	4	4	2	4	1	4	2	1	1	2	4	4	4	2	1	2	4	2	2	1	4	2	2	2	2	4	2	2	2	2	1	2	2	4
	372	2		3	2	4	3	2	4	3	2	2	1	4	2	1	2	2	4	4	2	2	2	4	4	4	4	4	3	1	1	2	4	2	3	2	2	2	2	4	4	1	2	4	2	2	3	2	2
	373	2		4	2	2	4	1	1	4	2	4	2	2	4	1	4	2	2	4	4	4	4	2	4	4	4	2	2	2	2	2	4	4	1	2	2	4	2	4	1	3	1	1	4	1	4	3	1
	374	2		2	4	2	4	2	1	4	4	4	3	4	4	2	2	1	1	2	1	4	3	2	2	1	2	2	2	2	2	2	1	1	2	1	2	1	4	4	2	2	4	1	2	2	4	4	4
	375	2		2	4	2	2	4	1	1	4	3	4	2	2	4	4	2	2	1	1	3	4	2	1	1	1	4	2	2	1	2	2	1	2	4	4	4	1	4	4	2	1	4	4	2	2	4	2
	376	2		2	4	4	4	1	1	2	4	2	2	4	2	4	4	4	4	2	4	2	1	2	2	2	4	2	4	2	2	1	4	3	2	4	2	2	2	1	4	2	4	2	2	1	1	3	2
	377	2		1	3	1	1	4	2	4	2	4	4	2	4	2	4	2	3	4	2	4	2	4	2	4	4	4	4	2	2	4	2	3	3	2	1	3	2	4	1	2	2	2	2	4	4	2	2
	378	2		2	4	2	3	3	2	2	2	4	2	4	4	2	4	2	3	4	4	4	4	2	4	1	4	3	2	2	1	3	2	2	2	2	2	2	1	2	3	2	2	2	2	2	3	4	2
	379	2		2	2	1	1	4	4	4	4	1	4	3	2	4	2	4	2	2	1	2	3	2	4	4	2	2	2	2	2	2	2	4	4	4	4	1	2	2	4	2	3	1	3	4	2	4	2
	380	2		3	4	2	2	4	2	2	2	2	1	2	4	1	3	4	4	2	2	2	2	1	4	4	1	1	4	4	1	1	2	2	4	2	1	2	2	4	4	2	1	4	4	2	1	1	4
	381	2		3	4	2	2	2	4	2	3	4	4	3	2	2	2	2	3	2	2	2	4	2	2	2	4	4	2	1	2	1	2	2	4	1	2	2	3	2	2	2	2	2	4	4	4	4	3
	382	2		2	4	2	1	4	2	4	1	2	2	2	2	2	4	1	2	1	1	2	1	2	2	4	4	3	2	2	1	1	4	2	4	4	4	4	2	2	4	4	4	1	2	1	2	4	2
	383	2		4	4	4	2	4	2	2	3	2	4	1	1	1	4	4	2	4	3	1	2	2	2	4	2	2	2	2	4	2	2	2	2	2	2	2	2	3	2	2	1	2	2	2	2	4	4
	384	2		2	1	2	1	3	2	1	4	4	2	3	4	4	2	4	4	4	4	2	3	1	3	3	2	2	4	4	1	2	3	2	1	3	2	4	2	3	2	2	2	2	2	1	2	1	2
	385	2		4	4	2	2	2	4	2	2	3	1	4	4	2	4	4	3	1	4	2	2	2	1	2	2	2	2	2	4	4	1	4	2	4	4	2	4	3	1	4	1	2	3	1	2	2	2
	386	2		3	2	2	4	1	4	4	1	2	2	2	4	2	2	2	2	4	4	2	1	2	2	1	2	4	2	4	4	2	4	2	2	2	2	2	2	2	1	2	2	2	2	4	2	4	1
	387	2		4	4	2	4	4	4	2	2	3	3	2	2	2	2	4	1	2	1	2	2	1	2	4	3	3	4	2	4	2	2	1	1	4	1	2	4	1	1	4	1	4	3	2	2	2	2
	388	2		2	4	4	4	2	2	4	4	1	2	2	4	4	2	2	2	1	4	2	4	4	1	2	2	2	2	4	3	2	4	4	2	2	2	2	1	2	2	4	2	2	4	4	2	2	2
	389	2		2	2	2	1	2	2	4	2	1	4	2	2	2	3	1	2	2	1	4	4	4	3	1	2	2	4	4	1	2	2	4	2	2	1	2	2	2	4	2	1	4	4	4	2	1	2
	390	2		3	1	4	2	4	4	2	4	2	4	4	4	2	4	2	4	3	3	2	4	4	3	3	4	3	4	2	2	4	2	4	4	1	4	2	2	2	2	2	2	4	3	4	1	1	4
	391	2		3	2	2	4	2	4	4	1	2	2	2	1	4	2	4	4	3	1	4	1	3	4	2	2	1	2	2	1	1	2	2	2	1	1	2	4	1	4	2	2	2	2	3	2	2	1
	392	2		1	2	4	2	4	4	1	2	4	4	3	1	2	2	2	2	2	2	4	4	2	1	2	2	3	4	4	2	2	2	4	2	1	1	1	2	4	2	2	2	2	2	2	2	2	4
	393	2		4	2	2	2	4	2	4	2	4	4	4	4	2	3	2	4	2	4	4	2	2	1	1	2	4	4	2	2	2	2	3	4	2	3	2	2	2	1	2	2	2	4	4	2	4	2
	394	2		4	1	2	1	1	2	2	2	4	1	3	2	2	2	2	1	2	3	2	4	2	2	2	1	4	4	1	3	4	1	2	4	2	2	1	4	4	4	2	1	2	3	2	4	4	2
	395	2		2	4	2	4	4	1	4	1	4	2	1	2	3	2	4	4	4	4	3	3	2	2	4	4	2	2	2	2	2	2	2	3	4	2	2	4	4	4	2	2	2	2	4	2	2	1
	396	2		4	2	2	2	2	4	1	4	1	2	4	1	3	1	2	2	4	1	4	4	4	4	1	2	4	4	2	4	4	1	4	2	2	2	2	4	2	2	2	2	1	4	1	3	4	2
	397	2		4	2	1	2	1	2	2	2	2	2	2	3	3	2	4	4	3	2	4	4	4	2	2	1	2	3	2	1	2	4	4	1	2	2	2	2	1	2	4	4	4	2	4	4	1	2
	398	2		1	4	4	4	2	2	3	4	2	4	2	2	2	2	2	1	4	4	2	3	4	2	3	2	2	2	2	1	2	1	2	1	4	3	4	2	2	2	4	2	2	4	2	4	2	2
	399	2		1	1	2	2	2	4	2	2	4	2	4	4	4	4	4	4	2	4	1	4	3	2	1	4	2	4	4	3	1	1	4	2	2	2	4	2	1	2	2	2	1	4	4	2	4	4
	400	2		4	3	4	1	4	2	4	4	2	4	2	1	2	4	3	2	4	4	4	3	2	2	4	3	4	2	1	4	2	2	1	1	4	4	1	3	1	2	4	2	4	4	4	4	2	4
	401	2		1	2	2	2	2	4	2	4	2	1	4	4	3	2	4	2	2	2	2	2	4	2	2	2	2	2	2	4	4	4	4	1	2	4	2	4	1	2	2	2	2	3	4	2	1	2
	402	2		2	4	4	4	2	2	1	4	2	1	3	4	3	1	4	2	2	1	1	2	1	2	2	2	4	4	2	2	2	1	2	4	2	4	2	2	1	4	2	3	2	2	1	2	1	2
	403	2		2	4	4	4	1	1	4	4	1	4	2	2	4	4	4	2	2	4	2	2	2	4	4	2	1	2	2	4	1	2	4	4	2	2	2	4	2	4	2	4	2	2	2	4	2	2
	404	2		2	2	1	4	2	4	2	1	2	2	4	1	2	4	2	2	2	2	4	1	3	3	2	1	4	3	4	2	2	4	4	2	4	4	1	2	2	2	2	4	4	2	3	4	2	4
	405	2		3	2	4	4	4	2	2	4	4	4	1	1	4	2	2	2	2	2	4	2	2	4	4	2	1	1	4	2	4	4	3	4	4	1	1	1	4	3	2	4	2	3	2	2	2	1
	406	2		2	4	4	1	4	2	1	4	1	2	2	2	1	2	2	3	2	2	2	2	3	2	2	4	2	1	1	2	4	2	4	2	1	1	4	2	1	2	4	4	2	4	2	1	2	4
	407	2		4	2	2	2	1	2	2	4	2	2	2	2	2	2	4	2	3	3	3	1	2	1	1	2	1	2	2	4	4	2	2	4	4	1	2	4	4	2	1	4	2	1	4	2	2	4
	408	2		1	2	2	4	4	2	2	4	2	2	2	1	4	2	4	1	2	1	2	4	4	4	3	4	2	1	1	4	2	1	2	4	4	4	2	2	2	2	4	4	4	4	2	4	4	2
	409	2		2	4	3	3	4	2	2	2	3	2	1	2	4	2	2	3	2	1	2	4	2	2	4	1	1	2	2	2	3	4	1	1	2	1	4	3	4	4	1	4	4	2	2	2	2	2
	410	2		4	2	4	2	2	4	4	1	2	4	2	2	2	2	4	2	4	3	1	2	3	1	2	2	2	2	4	2	1	4	2	2	4	4	2	4	4	1	2	3	2	2	2	2	4	3
	411	2		4	4	1	2	4	1	4	2	4	2	1	2	4	2	4	2	2	1	4	1	4	2	3	4	4	4	4	2	3	4	4	2	2	2	4	2	2	1	4	4	2	2	2	1	4	2
	412	2		4	4	4	2	2	2	2	2	2	4	1	4	2	4	3	2	1	3	2	2	2	4	2	4	1	4	4	1	1	2	4	1	2	2	2	1	2	2	2	2	2	2	2	2	2	2
	413	2		2	3	4	4	2	2	1	4	2	2	2	4	2	2	4	2	2	4	4	4	1	4	2	3	4	2	2	2	2	2	2	2	2	2	2	2	4	2	1	4	4	2	2	4	4	1
	414	2		1	2	3	2	2	2	4	1	3	2	2	1	2	4	2	2	1	2	4	4	1	2	2	2	3	1	3	2	2	2	4	4	2	3	2	2	2	1	1	1	1	2	2	4	2	4
	415	2		4	3	4	2	2	3	2	2	3	4	3	1	4	2	2	4	4	2	2	4	4	2	1	2	4	2	1	2	2	2	2	1	1	1	1	4	4	4	4	2	2	2	2	4	2	4
	416	2		1	2	1	2	2	4	4	4	2	2	2	2	2	2	2	1	1	4	4	2	2	2	4	4	4	2	4	2	3	2	4	2	1	2	2	4	4	2	4	2	2	3	3	1	1	4
	417	2		2	4	2	4	1	4	4	2	1	1	1	2	2	4	2	2	2	2	2	2	4	2	2	2	2	1	2	1	2	1	2	2	2	2	1	4	2	3	4	4	2	2	2	2	4	2
	418	2		2	2	2	3	2	4	1	2	4	3	2	2	3	1	1	4	2	1	2	4	2	2	2	1	2	1	4	4	1	4	2	2	2	2	4	4	2	2	4	2	4	4	4	2	2	2
	419	2		4	1	3	2	2	2	4	4	2	3	2	1	2	2	2	4	1	4	4	4	1	2	2	2	4	4	1	4	2	4	4	4	4	1	1	4	3	2	2	4	4	4	2	2	4	4
	420	2		4	4	2	4	1	2	3	4	2	4	4	4	3	2	3	3	2	2	4	2	4	3	2	2	4	4	4	2	4	1	4	4	4	2	2	2	4	1	4	4	4	2	4	4	4	4
	421	2		2	2	2	4	4	2	1	3	2	2	1	2	3	4	2	3	4	2	4	1	3	2	1	3	2	4	2	3	2	2	1	3	2	2	1	2	2	4	2	2	4	2	1	2	1	4
	422	2		2	1	4	2	4	2	4	4	2	4	2	1	4	2	4	1	4	3	4	2	3	2	2	4	4	2	2	2	4	4	2	2	2	4	2	4	2	4	4	4	2	4	4	1	2	2
	423	2		4	2	2	2	2	1	3	4	4	2	2	2	2	2	2	1	4	2	4	2	4	2	2	2	2	1	3	1	2	4	4	4	1	1	4	4	1	3	3	2	4	2	2	2	2	4
	424	2		2	2	3	4	4	4	2	2	4	2	2	2	4	4	4	1	4	4	2	2	1	4	1	1	4	2	4	1	2	2	2	2	1	2	1	2	2	4	2	2	2	2	4	4	2	2
	425	2		1	4	1	4	2	3	1	2	1	2	2	2	4	4	4	1	2	2	2	1	2	3	1	4	2	1	4	2	4	2	4	2	2	4	2	2	2	2	2	2	4	2	1	3	4	2
	426	2		2	2	2	1	2	2	1	1	2	2	1	1	4	2	4	4	2	4	2	2	1	1	2	2	4	4	4	4	4	2	2	4	1	2	4	2	3	4	4	2	4	1	1	4	2	3
	427	2		4	2	2	3	1	1	2	3	1	1	1	4	2	2	4	2	4	1	2	2	2	4	2	1	3	4	2	2	2	1	2	1	1	1	2	2	4	1	2	2	4	1	2	4	2	2
	428	2		2	3	4	1	1	2	2	2	3	4	2	4	4	2	4	4	2	2	1	4	2	4	4	2	2	2	2	4	1	2	1	4	2	2	2	3	1	2	2	4	1	2	2	4	4	2
	429	2		2	2	3	2	3	1	2	3	2	2	1	2	2	1	4	2	2	2	2	2	2	1	2	2	2	2	4	2	1	1	2	2	2	4	2	4	1	2	4	2	2	2	2	2	4	2
	430	2		1	2	2	4	1	2	4	1	2	1	2	2	2	1	4	4	1	1	4	4	4	2	1	2	1	2	2	1	4	4	4	4	4	2	2	4	4	4	2	2	4	4	2	1	1	4
	431	2		4	4	2	4	2	2	2	4	2	1	3	1	4	2	4	2	1	1	2	3	3	3	4	4	4	2	3	1	4	1	1	3	4	4	2	2	2	4	1	2	2	1	2	1	1	1
	432	2		2	2	2	2	2	2	4	2	2	2	4	2	2	4	2	2	4	2	2	2	1	4	2	4	2	1	3	4	2	2	2	2	2	2	3	2	2	2	4	1	4	2	2	1	4	4
	433	2		4	2	2	4	4	4	2	2	4	1	1	4	1	4	1	4	4	4	1	4	4	4	4	1	2	2	1	4	2	1	4	2	2	3	3	3	2	2	2	4	2	2	2	1	1	4
	434	2		4	4	1	1	2	4	4	2	1	2	4	4	2	2	2	2	2	4	4	2	2	4	1	1	2	3	2	1	1	2	2	1	1	2	4	2	2	1	2	2	2	4	4	2	2	4
	435	2		4	4	2	2	4	4	4	2	4	1	3	4	4	1	1	4	2	2	2	2	1	2	2	4	1	1	4	4	2	2	4	4	4	2	4	4	1	2	2	2	2	1	2	4	4	2
	436	2		2	2	2	2	4	3	4	2	4	2	4	2	4	1	2	2	4	2	1	3	2	2	4	1	4	2	4	4	2	2	4	4	2	2	2	1	4	4	1	1	2	2	2	2	1	2
	437	2		2	1	4	2	4	2	2	4	1	3	4	1	2	3	1	1	2	2	4	2	2	4	2	4	2	4	2	2	1	2	2	3	1	2	1	1	2	1	2	4	4	3	4	1	4	2
	438	2		2	1	4	2	2	4	4	2	2	4	2	2	2	2	1	4	4	2	2	3	2	2	2	2	2	2	2	4	4	2	2	4	1	2	4	1	1	2	2	4	4	2	2	2	2	1
	439	2		2	2	2	2	4	2	2	2	2	4	4	2	4	4	4	2	4	2	3	2	3	1	1	2	4	3	2	3	2	1	2	4	1	2	1	2	1	1	4	1	1	2	2	2	4	2
	440	2		2	3	2	2	4	4	2	1	2	4	1	2	4	1	2	4	3	2	2	2	1	2	2	4	2	2	2	3	2	3	2	4	1	2	4	2	1	2	1	2	4	2	2	3	2	4
	441	2		4	4	2	2	2	2	2	1	1	4	3	2	4	2	2	2	2	4	2	2	1	1	2	4	4	2	4	1	2	1	4	4	4	2	4	1	2	1	2	2	2	4	1	2	1	4
	442	2		1	2	2	4	2	1	4	1	2	1	2	1	2	2	2	1	2	2	2	3	1	1	2	1	1	2	4	2	2	3	2	2	2	4	4	4	3	2	2	4	4	2	4	4	2	3
	443	2		2	2	2	4	2	2	4	3	4	2	2	4	2	1	1	4	4	2	2	4	2	1	2	1	4	4	2	4	4	2	1	2	2	2	2	3	4	1	4	4	2	2	2	4	3	2
	444	2		2	2	1	2	2	2	4	2	2	4	4	2	2	3	2	2	2	2	2	1	4	4	2	1	2	2	1	4	4	4	3	2	2	2	4	4	1	3	2	2	2	2	4	1	2	3
	445	2		2	3	3	2	1	2	2	4	1	2	4	2	1	4	4	2	1	1	2	1	3	2	2	2	3	4	4	2	2	2	4	2	2	4	2	1	2	1	1	2	1	2	2	2	2	4
	446	2		2	2	3	3	3	1	4	2	1	1	4	3	2	2	1	4	4	2	4	4	4	4	4	2	2	2	2	2	1	1	2	2	2	1	2	3	2	2	4	2	1	2	4	2	1	1
	447	2		4	1	2	4	2	4	2	1	3	2	1	4	3	2	2	4	1	2	2	1	4	3	2	4	4	4	2	1	1	1	1	1	4	2	4	2	4	2	2	1	2	2	1	2	2	3
	448	2		2	2	2	4	2	2	4	3	2	4	2	2	2	2	4	1	2	4	2	4	4	3	4	1	1	1	4	1	3	2	2	3	2	1	2	2	4	2	2	4	2	4	2	4	2	4
	449	2		4	1	3	1	2	2	2	2	2	2	3	2	2	2	4	1	2	2	1	2	3	4	2	2	1	1	4	4	1	4	2	3	2	2	3	2	2	4	2	4	4	2	1	2	4	2
	450	2		2	2	4	1	4	4	1	2	1	2	3	4	4	4	4	2	2	2	4	2	2	2	3	4	2	1	1	2	2	4	2	2	2	4	4	1	2	1	2	4	4	2	2	2	2	2
	451	2		1	2	2	1	2	2	2	2	3	2	1	2	2	4	1	2	4	2	2	1	2	2	2	2	4	4	2	4	2	1	2	4	2	2	2	2	2	4	2	2	4	2	2	2	4	2
	452	2		2	2	4	4	4	2	1	4	1	2	4	2	3	2	4	2	4	2	2	2	3	2	1	4	4	1	2	2	2	2	3	1	2	2	3	2	2	2	4	2	2	4	1	2	2	2
	453	2		2	2	2	2	2	2	2	4	2	4	2	2	2	2	2	2	4	2	4	1	2	1	4	4	2	4	3	2	4	2	2	3	2	2	1	2	4	4	1	2	2	4	4	1	1	3
	454	2		4	4	2	3	2	2	2	2	3	4	4	3	2	4	2	2	2	4	2	4	4	1	2	4	2	4	1	2	1	2	2	2	2	1	4	4	4	4	1	1	1	2	2	2	2	4
	455	2		4	4	2	1	3	1	1	4	4	1	4	2	2	4	4	3	4	1	4	1	2	2	2	2	2	4	4	1	2	4	3	2	4	2	2	2	4	2	4	1	1	4	4	3	2	2
	456	2		2	3	2	2	2	2	2	2	4	4	2	2	1	2	2	2	3	2	4	4	4	2	4	1	2	2	2	2	2	1	2	1	3	1	2	1	2	4	2	1	1	4	1	1	1	2
	457	2		4	4	2	2	2	1	4	2	2	2	4	4	2	2	4	2	4	2	4	4	2	2	1	2	1	1	2	2	4	2	4	4	1	3	1	4	2	4	4	2	1	3	4	4	4	2
	458	2		3	2	2	2	2	4	1	1	2	2	2	2	3	2	2	2	4	2	1	1	4	1	2	3	2	3	1	4	4	1	4	4	2	2	1	4	2	1	2	4	3	2	2	2	2	1
	459	2		4	3	2	2	1	2	1	2	2	2	1	4	1	2	3	1	4	2	1	2	2	2	2	4	2	1	4	2	2	3	4	2	4	3	2	2	1	4	4	4	4	2	2	2	2	3
	460	2		1	4	2	4	1	2	2	4	2	4	4	3	2	2	4	2	2	2	2	1	2	2	1	2	3	2	3	4	2	4	4	2	4	4	4	4	4	4	4	2	1	1	2	2	2	4
	461	2		4	2	1	4	2	2	4	2	2	4	2	2	2	4	2	4	4	4	2	2	2	3	3	2	2	4	2	1	2	2	2	2	2	1	1	2	2	4	4	1	4	2	2	2	3	3
	462	2		2	4	4	4	4	2	4	4	1	2	2	4	2	4	2	2	4	1	2	4	2	4	2	2	4	4	4	3	2	2	4	2	2	3	4	3	2	4	3	1	2	4	2	4	4	1
	463	2		2	2	2	4	4	2	2	3	4	4	2	2	4	2	1	3	4	4	2	1	2	2	2	4	2	2	2	2	4	1	2	2	4	1	4	4	4	2	2	1	2	1	2	4	4	1
	464	2		2	1	4	1	4	2	2	2	2	1	1	2	1	2	2	4	4	2	2	2	1	2	2	2	4	2	2	4	2	1	2	2	1	2	2	1	4	4	2	2	2	2	1	2	2	2
	465	2		4	2	1	2	2	1	4	1	4	4	2	4	2	2	2	1	1	1	1	1	4	2	1	1	4	3	2	1	1	1	4	2	4	1	2	2	2	4	2	2	4	2	2	2	2	2
	466	2		4	2	1	2	2	1	4	2	2	2	4	4	2	2	2	2	1	1	3	1	4	2	4	3	2	3	4	3	2	1	2	2	2	2	2	4	4	2	2	2	2	1	2	2	2	4
	467	2		3	4	2	2	4	2	3	3	3	4	2	4	4	1	4	2	2	4	2	2	1	1	2	4	4	4	1	3	2	4	2	1	2	4	2	3	4	2	4	2	1	2	4	2	2	1
	468	2		2	4	2	3	2	1	4	2	2	2	2	1	1	2	3	1	2	3	2	4	2	4	4	4	4	4	3	4	1	4	4	2	4	4	4	4	4	2	4	2	2	1	2	1	2	2
	469	2		4	4	2	2	2	4	1	1	1	1	2	4	4	2	2	4	4	2	3	1	3	2	1	2	2	1	2	2	2	2	4	2	4	1	2	4	2	4	2	2	1	3	4	3	4	4
	470	2		4	2	1	3	4	2	2	4	2	2	2	4	2	1	4	2	3	2	4	2	2	1	3	1	2	4	2	2	4	2	4	4	2	4	2	3	2	4	2	4	2	2	2	4	1	4
	471	2		4	4	4	2	2	2	2	4	3	4	2	2	2	2	2	2	2	4	2	3	2	2	1	2	2	3	2	2	2	1	1	1	2	2	4	4	4	4	4	2	1	2	2	4	1	4
	472	2		4	2	2	3	2	1	4	2	2	2	4	2	2	3	1	2	1	4	1	4	4	4	2	2	2	2	2	2	2	2	2	1	4	4	1	1	4	2	1	1	3	2	1	2	2	2
	473	2		2	2	2	2	2	2	2	2	2	4	1	2	2	2	2	2	1	2	4	2	2	4	2	2	4	4	1	2	2	2	2	2	2	2	4	2	2	2	1	2	3	2	2	4	2	1
	474	2		2	2	1	2	2	2	4	4	2	4	2	1	1	4	1	2	2	2	2	2	3	4	3	2	2	2	4	4	2	2	4	4	1	4	2	1	1	1	2	2	2	2	2	4	4	4
	475	2		2	2	4	4	2	2	2	1	2	4	2	4	2	2	4	4	2	4	4	1	1	4	2	2	1	2	1	2	2	2	3	4	4	2	2	4	4	2	2	2	3	1	2	2	3	2
	476	2		4	2	4	3	4	1	2	4	4	2	2	2	2	2	4	4	2	1	4	2	1	4	3	4	1	4	1	4	1	2	2	4	2	2	1	4	1	2	2	4	4	2	4	2	3	4
	477	2		2	1	4	4	4	1	1	2	2	3	4	2	4	1	4	1	2	2	4	4	4	2	2	3	2	1	4	4	2	3	2	4	2	2	4	4	2	2	1	2	4	2	3	4	1	2
	478	2		1	2	2	1	4	1	2	2	4	4	2	4	2	2	4	2	2	2	2	4	4	2	4	4	2	2	1	2	3	4	2	1	1	3	4	2	3	4	2	4	2	2	4	2	2	3
	479	2		4	2	2	4	4	1	4	1	2	3	4	1	4	1	2	4	2	4	1	2	1	4	2	2	4	2	4	2	2	4	1	3	4	2	4	2	1	2	2	3	2	4	4	4	2	2
	480	2		2	2	1	4	2	4	4	1	2	4	2	4	2	2	2	4	2	2	4	2	4	2	2	2	2	2	1	2	4	1	3	4	4	4	2	2	2	4	2	4	2	2	4	2	2	4
	481	2		1	4	4	2	2	4	1	2	4	2	1	2	2	2	2	1	2	2	2	4	4	2	2	4	1	2	2	2	4	2	4	2	2	1	1	4	2	2	2	1	2	1	1	4	2	2
	482	2		2	2	3	2	2	4	1	2	4	2	2	2	2	4	2	2	2	4	2	2	4	4	1	2	1	1	4	2	2	2	4	2	2	2	4	2	2	4	1	2	4	4	1	1	3	1
	483	2		1	2	2	4	2	2	4	2	2	2	4	2	1	4	3	2	2	2	1	2	4	4	1	2	2	2	2	4	4	2	2	4	3	2	3	2	2	1	4	2	2	1	1	1	4	2
	484	2		4	2	2	2	3	4	1	2	4	1	2	2	2	2	2	2	2	2	2	1	4	2	2	2	2	2	2	1	2	2	4	2	4	4	2	2	2	2	1	2	1	2	4	1	2	2
	485	2		2	2	4	2	4	4	2	3	4	2	1	4	2	3	2	2	4	4	3	4	2	2	4	1	4	2	2	2	2	2	2	2	2	2	4	4	2	1	4	2	4	1	2	4	2	2
	486	2		4	2	4	1	4	4	1	4	3	4	2	2	2	2	1	1	1	4	4	3	2	2	1	4	3	2	4	2	4	2	2	2	1	2	4	4	4	2	3	4	4	4	2	2	2	2
	487	2		2	1	2	2	2	2	2	2	2	2	1	1	2	1	1	2	2	2	4	1	1	2	1	3	2	4	2	2	2	1	1	2	3	1	2	2	2	2	4	4	1	2	2	2	2	2
	488	2		3	2	4	1	4	4	2	1	2	4	1	2	2	1	4	2	3	4	1	3	4	2	4	3	4	2	2	1	4	2	4	3	2	2	4	4	4	2	4	2	1	4	4	4	1	1
	489	2		2	2	2	1	1	4	4	4	2	4	1	4	1	2	4	2	4	2	2	4	2	4	1	1	4	4	2	1	1	2	2	2	2	2	2	4	2	4	2	2	2	2	2	4	4	4
	490	2		4	1	2	4	2	1	4	3	2	1	1	1	2	4	1	2	2	1	2	2	4	3	4	2	4	2	2	2	2	4	4	4	4	1	3	2	2	4	1	3	4	1	4	4	3	1
	491	2		2	2	2	2	1	2	4	4	3	4	2	4	2	4	4	2	4	4	2	3	4	2	4	2	4	1	1	1	1	2	1	4	3	4	1	4	1	4	4	2	2	4	3	3	2	3
	492	2		1	2	2	4	1	1	2	2	4	1	4	4	2	4	2	2	2	2	1	1	2	4	4	4	2	2	3	2	2	2	2	4	2	4	4	2	3	2	3	2	2	4	1	1	2	2
	493	2		4	1	4	2	2	2	2	1	1	1	2	3	1	2	2	4	2	4	2	2	2	2	3	1	3	4	2	4	2	4	2	1	1	1	4	1	4	4	2	2	4	2	3	2	3	4
	494	2		2	3	2	2	3	2	2	4	2	2	2	4	2	4	1	2	2	4	4	2	2	3	2	2	1	4	2	4	2	1	2	3	3	1	4	2	3	2	4	2	4	2	2	2	2	2
	495	2		2	2	2	4	1	2	4	1	3	2	2	4	2	2	4	1	2	2	2	2	2	1	2	4	2	4	4	2	1	4	2	2	2	4	4	2	2	4	4	4	2	4	1	2	2	1
	496	2		1	4	4	2	1	2	1	2	1	2	2	4	2	2	2	1	2	1	2	2	2	2	1	2	4	1	3	4	4	1	2	2	1	2	1	2	2	2	3	2	3	2	2	4	2	2
	497	2		2	4	1	1	2	2	2	2	2	2	4	2	2	4	2	4	4	1	4	2	2	4	2	1	4	2	2	3	4	1	2	1	3	2	4	1	4	2	2	2	2	2	2	4	4	2
	498	2		2	1	2	2	2	2	1	4	2	4	2	4	4	2	2	2	1	4	4	2	4	4	2	2	3	2	1	2	2	3	2	2	1	3	4	4	1	2	1	2	4	4	2	3	4	4
	499	2		4	4	3	2	2	2	2	4	2	4	2	4	2	4	2	4	1	4	1	4	2	3	2	2	2	4	4	2	2	4	2	4	2	3	3	1	2	2	2	2	4	2	4	4	2	2
	500	2		2	4	2	1	4	2	4	4	4	2	2	4	2	4	1	2	1	4	2	2	2	4	4	1	4	2	2	4	4	4	1	1	3	2	2	4	2	4	2	2	2	2	2	4	2	2
	501	2		2	1	4	2	2	2	4	4	4	1	3	2	4	1	3	2	2	2	4	4	2	2	2	2	4	4	2	4	3	2	4	2	2	2	2	4	2	2	4	4	2	2	3	4	4	2
	502	2		1	2	2	4	4	4	2	2	2	4	4	4	4	1	1	4	2	2	4	4	4	2	3	4	1	2	2	4	4	3	4	2	2	2	4	2	4	2	2	3	2	2	4	2	2	1
	503	2		2	2	4	4	4	2	2	4	4	1	2	4	2	2	2	2	2	2	2	4	4	4	2	1	4	2	2	4	2	2	1	1	2	2	4	4	4	4	4	2	1	2	1	4	2	1
	504	2		2	4	2	2	2	4	2	2	4	2	4	4	3	2	1	1	1	3	1	2	4	2	2	2	4	3	2	2	4	1	2	1	2	4	2	1	2	2	4	2	4	2	2	1	2	1
	505	2		1	2	2	2	4	1	1	4	4	4	2	4	1	2	3	4	4	1	2	2	1	3	2	2	2	4	2	4	2	1	3	1	2	2	2	2	1	2	2	2	1	4	2	4	2	2
	506	2		2	1	2	2	2	1	2	2	2	4	2	2	2	4	1	2	4	2	1	2	4	1	2	1	2	4	1	2	1	2	1	4	4	3	4	4	4	1	1	4	2	1	2	1	2	4
	507	2		2	1	2	2	4	2	4	3	1	4	2	4	2	2	2	2	4	2	2	4	1	4	4	2	2	2	1	3	3	1	1	1	2	4	2	4	2	2	2	4	2	2	4	4	4	1
	508	2		2	1	2	4	3	2	1	1	2	1	2	4	3	2	2	2	2	4	1	4	2	3	4	2	2	2	2	4	2	3	4	2	4	1	2	1	4	1	2	1	2	2	4	2	4	2
	509	2		2	1	1	2	2	4	4	3	1	3	4	2	2	4	2	4	3	2	2	1	4	2	4	2	2	3	4	2	4	3	3	4	2	2	4	4	3	1	1	2	1	2	2	4	2	2
	510	2		2	1	1	3	4	2	4	1	2	2	1	1	4	4	4	2	4	2	4	2	4	2	2	2	2	4	3	2	4	2	4	2	2	2	2	1	3	2	4	2	3	4	2	3	2	4
	511	2		2	4	2	2	1	4	4	4	2	2	2	2	4	1	2	2	2	4	1	2	3	2	2	4	4	2	1	1	4	4	2	1	4	3	3	4	2	4	4	3	4	4	1	2	1	4
	512	2		2	1	4	2	1	4	2	4	4	4	2	3	2	2	3	2	3	4	1	1	2	4	3	2	1	3	2	2	4	4	4	1	4	2	3	4	2	3	3	2	4	2	3	4	2	4
	513	2		3	2	4	1	2	2	2	4	2	2	4	2	2	2	2	3	3	3	4	1	4	4	2	4	4	2	4	4	2	2	2	4	2	2	2	1	2	1	4	2	1	1	1	4	1	2
	514	2		2	2	1	1	1	1	4	2	4	2	1	2	2	4	4	1	2	2	1	2	2	2	4	2	2	4	3	2	2	4	4	2	1	4	2	4	4	2	3	4	3	1	2	4	4	4
	515	2		3	1	1	1	4	2	2	3	1	1	4	2	2	4	2	2	4	2	2	4	2	1	1	2	1	4	2	2	2	1	2	1	2	1	1	4	2	3	4	1	4	2	2	2	2	4
	516	2		4	4	2	1	2	2	2	2	2	1	4	1	4	4	2	1	4	2	1	2	2	4	4	3	2	4	2	2	2	2	1	2	4	1	4	2	2	2	3	2	1	2	1	2	4	2
	517	2		4	1	2	4	2	4	4	1	1	2	2	4	4	2	4	4	4	2	4	2	2	1	2	2	4	4	1	2	4	2	2	4	4	2	4	4	2	2	2	4	2	3	4	2	2	3
	518	2		2	2	2	2	2	2	2	4	4	2	2	1	1	4	2	2	4	2	2	4	2	2	4	2	4	4	2	4	1	2	2	1	2	2	2	2	4	3	2	2	2	4	2	2	3	2
	519	2		4	3	3	4	4	2	3	4	2	4	2	4	3	1	2	4	1	2	4	1	1	2	2	4	4	4	3	1	2	2	1	4	4	2	2	4	2	2	2	3	4	2	2	2	4	4
	520	2		3	4	2	3	4	4	4	1	2	2	1	2	4	2	4	2	2	2	2	2	2	2	2	4	1	4	2	4	2	3	2	1	3	4	1	2	1	1	2	1	4	2	1	2	2	4
	521	2		2	2	2	4	4	2	4	2	2	2	4	1	4	2	2	2	2	2	2	2	1	1	2	2	4	4	2	2	2	2	4	2	2	4	2	2	4	4	2	2	4	2	2	1	1	2
	522	2		4	4	2	4	2	4	2	2	3	2	2	4	2	2	2	2	1	3	1	2	4	1	2	4	4	4	2	2	1	2	2	2	4	2	2	4	2	4	4	2	2	2	4	4	2	2
	523	2		1	2	2	2	4	2	2	4	4	2	2	2	4	4	2	2	1	2	1	2	2	3	3	3	2	4	3	2	1	4	4	3	2	4	2	4	1	2	4	3	2	4	2	2	1	2
	524	2		4	4	2	1	2	2	2	2	2	1	2	4	2	1	2	2	4	4	4	2	2	2	4	2	4	4	4	4	1	4	2	4	2	2	2	2	1	2	2	4	2	2	2	4	2	4
	525	2		3	2	2	2	1	4	2	4	1	2	4	2	4	2	1	1	4	2	2	2	2	4	3	4	2	4	1	4	4	2	2	4	1	4	3	1	2	2	1	2	2	4	1	4	1	2
	526	2		2	3	2	4	4	4	4	2	2	2	2	2	1	2	2	1	2	4	2	4	4	2	3	4	4	2	1	1	2	4	4	2	4	4	2	2	2	1	1	2	3	4	2	4	1	1
	527	2		4	2	4	2	2	2	2	4	3	4	2	2	2	2	1	2	4	2	1	2	1	4	2	1	4	2	2	4	2	4	1	2	1	2	2	4	2	4	4	2	2	4	2	3	4	4
	528	2		2	3	4	3	4	2	2	2	3	2	2	3	2	4	2	2	4	2	4	1	4	4	1	4	2	1	2	1	2	2	2	2	2	2	2	4	1	2	4	2	2	2	2	2	2	3
	529	2		2	4	4	4	4	2	2	2	1	4	1	4	4	2	2	4	1	2	2	2	1	2	4	4	4	2	2	2	4	4	1	2	1	4	4	2	4	2	4	2	2	2	2	2	2	2
	530	2		1	2	3	2	2	4	4	2	2	3	2	4	1	2	2	2	3	2	4	1	2	1	4	4	4	4	2	2	4	2	2	1	2	2	4	4	2	1	1	2	3	2	2	1	1	4
	531	2		2	4	2	2	2	4	4	4	4	1	1	2	1	3	4	4	2	2	1	1	2	1	2	1	4	2	1	1	4	2	4	2	2	1	2	2	2	4	4	4	2	4	2	2	1	2
	532	2		4	2	4	2	2	4	4	2	4	2	4	3	2	2	4	1	2	1	2	4	4	2	4	2	2	4	1	2	4	2	2	1	1	2	4	1	2	2	4	4	4	2	2	4	4	4
	533	2		2	4	1	2	4	2	1	4	4	2	4	2	2	4	2	2	4	2	3	2	1	2	2	4	2	2	1	1	4	2	1	2	4	2	3	2	4	4	3	3	2	4	4	2	2	1
	534	2		4	1	4	4	2	2	2	2	1	2	4	2	4	4	2	2	2	4	4	2	2	2	2	2	2	2	4	4	2	1	1	2	2	2	4	2	1	1	2	4	1	1	1	2	1	2
	535	2		2	2	2	2	2	3	2	2	4	2	4	1	2	2	1	2	2	2	4	2	3	2	4	2	4	4	2	4	2	2	4	2	4	1	2	2	1	2	2	2	4	4	2	4	1	2
	536	2		4	2	1	2	2	2	4	1	1	4	4	1	1	2	4	4	2	3	2	1	2	2	2	3	4	3	2	3	1	4	4	2	4	2	2	1	2	3	2	2	2	2	2	1	4	4
	537	2		1	4	3	3	4	1	2	4	1	1	2	4	2	2	4	1	4	4	4	2	2	2	2	4	3	2	2	2	4	2	4	1	3	1	2	2	2	2	3	4	4	1	4	3	4	4
	538	2		2	4	4	4	2	4	3	4	1	2	1	1	2	2	1	2	1	4	2	2	1	2	1	2	2	4	2	2	3	2	2	2	1	4	4	4	1	2	2	1	4	4	1	4	2	2
	539	2		2	1	3	4	3	2	3	4	2	1	2	4	4	4	2	2	2	2	2	2	3	2	3	2	2	1	2	4	4	2	4	4	2	4	2	4	2	2	2	4	2	2	1	4	4	4
	540	2		2	4	2	2	4	1	1	2	1	2	4	4	4	4	2	2	2	2	2	3	4	3	2	2	2	4	3	4	4	3	2	2	2	3	1	2	4	4	2	2	2	2	2	4	2	4
	541	2		2	2	2	3	3	1	2	1	4	4	2	4	4	4	2	2	2	2	2	4	4	2	1	2	2	3	4	4	4	2	2	2	2	2	4	4	1	4	2	4	4	2	4	3	4	1
	542	2		4	4	2	4	2	3	2	2	2	2	2	2	1	1	2	1	4	2	2	4	2	4	2	4	4	2	2	1	2	2	2	2	1	1	2	2	2	1	2	2	2	4	4	2	2	4
	543	2		2	1	2	2	2	4	4	2	4	4	4	2	2	1	2	4	4	2	4	1	4	3	1	1	1	2	2	1	2	2	2	4	2	4	2	2	2	3	2	1	2	3	1	1	1	4
	544	2		2	1	2	2	1	3	2	2	1	2	2	3	2	4	2	4	4	4	4	2	4	2	4	2	2	4	2	2	4	2	4	2	2	4	2	4	2	2	2	2	3	4	2	2	2	2
	545	2		2	4	4	2	4	4	4	4	4	2	2	2	2	2	3	1	2	2	4	4	4	2	4	1	2	2	4	4	2	2	2	4	2	3	4	2	2	2	2	3	2	2	2	2	2	4
	546	2		1	2	4	2	4	2	2	2	2	4	3	1	4	4	4	4	4	4	1	2	4	1	2	2	1	2	1	4	1	4	4	3	2	2	1	4	2	1	2	3	2	2	2	2	2	4
	547	2		2	2	2	4	4	2	2	4	1	4	4	2	4	2	2	2	1	1	2	4	4	4	2	2	2	2	4	1	4	1	1	4	1	2	4	1	2	1	4	2	4	2	3	4	2	4
	548	2		4	2	2	4	4	2	2	1	4	2	3	2	2	1	3	2	1	2	4	1	3	2	4	1	3	2	2	2	4	4	2	4	4	2	2	3	1	2	1	2	1	4	4	4	3	3
	549	2		2	1	3	4	4	2	2	3	2	1	2	1	2	3	4	1	2	4	1	2	2	4	4	3	2	2	2	2	4	4	1	4	1	1	2	2	2	4	4	2	2	2	4	3	4	4
	550	2		2	2	2	1	4	2	4	4	1	2	2	2	3	2	2	2	2	4	2	4	1	3	4	2	2	4	2	4	1	2	2	2	2	2	1	2	2	4	2	2	2	4	4	2	4	1
	551	2		4	2	4	2	1	1	2	2	2	1	4	2	4	4	4	1	4	2	1	2	4	1	4	2	4	4	2	2	1	2	2	2	1	2	2	4	4	2	2	1	2	3	2	2	4	4
	552	2		2	1	4	1	2	3	2	1	2	2	3	3	1	4	1	2	4	4	1	4	2	2	2	4	2	2	1	2	4	4	2	2	2	3	4	2	3	2	4	4	2	2	1	1	1	4
	553	2		2	2	2	4	2	2	4	2	2	4	2	2	2	2	2	2	4	4	4	4	2	4	1	1	1	4	4	4	2	4	2	4	3	3	2	4	2	4	2	2	2	4	1	2	1	4
	554	2		2	2	3	1	1	4	2	3	4	2	2	3	1	2	2	2	4	4	2	2	4	2	2	2	2	4	4	4	1	1	2	4	2	2	4	2	3	2	2	2	4	1	4	1	2	1
	555	2		4	2	4	2	3	2	4	2	3	1	2	2	4	2	2	2	2	2	2	2	2	4	4	3	4	4	2	4	2	4	4	1	2	4	4	1	2	2	1	1	2	2	4	2	2	4
	556	2		1	2	2	1	1	4	1	2	4	4	2	4	2	2	2	1	4	4	4	4	2	4	4	4	1	4	3	1	4	2	2	2	2	2	2	3	2	4	2	2	2	2	4	3	3	2
	557	2		2	4	4	1	4	4	2	3	3	4	2	4	2	2	2	2	2	3	2	2	4	2	4	2	4	1	2	4	4	2	4	3	2	4	2	4	2	2	2	4	2	3	2	1	2	2
	558	2		4	2	4	2	4	4	1	2	2	2	4	2	2	4	4	2	4	4	2	2	1	1	2	1	3	4	2	4	1	4	2	4	3	4	2	2	4	1	4	2	2	2	4	2	4	2
	559	2		2	4	1	2	1	2	2	4	4	2	2	4	4	2	2	3	2	2	2	4	2	4	2	1	2	2	2	2	2	4	2	2	2	1	2	4	4	1	2	2	4	4	2	4	2	2
	560	2		4	2	2	4	2	2	1	2	2	2	4	1	4	2	4	4	4	3	2	2	4	1	2	2	4	2	2	2	4	4	4	4	2	2	2	1	2	2	2	2	1	2	2	4	2	1
	561	2		2	4	2	2	4	2	2	2	4	1	2	3	3	4	2	4	2	2	4	1	4	2	2	1	2	4	2	4	1	2	1	2	2	4	1	4	2	4	2	4	4	4	4	1	2	4
	562	2		2	2	4	4	2	4	2	1	2	4	2	2	2	2	2	4	1	1	3	2	2	3	1	3	1	1	1	4	4	2	2	4	4	4	4	2	2	4	3	3	4	2	4	2	2	4
	563	2		4	2	4	2	1	3	4	2	4	2	4	1	4	3	4	2	4	1	2	1	4	4	2	2	2	2	2	2	2	1	1	1	2	1	4	2	4	2	2	2	4	2	4	2	2	3
	564	2		2	1	2	3	4	2	2	2	4	1	3	2	4	1	4	4	2	4	4	1	4	2	2	2	2	1	2	2	2	2	1	4	4	4	2	4	4	4	4	2	2	2	1	4	4	3
	565	2		4	3	2	3	2	2	4	2	4	2	1	4	2	2	2	1	4	4	2	4	2	2	2	1	3	2	4	1	2	2	4	2	4	4	2	4	2	1	2	3	1	2	4	4	4	4
	566	2		2	4	2	4	2	2	2	2	2	2	2	2	4	4	2	2	1	4	4	2	2	2	2	1	2	4	4	1	3	1	4	4	4	4	4	4	1	2	2	1	2	3	2	4	2	1
	567	2		2	4	3	2	4	4	2	1	2	2	4	4	3	4	4	1	2	2	2	4	3	4	2	3	2	1	4	1	2	2	2	4	2	3	4	2	3	2	2	1	2	2	2	1	2	4
	568	2		1	2	1	1	4	4	2	1	2	1	4	2	4	2	2	2	2	4	2	2	1	2	2	4	4	4	1	2	2	4	2	1	2	4	4	4	2	2	2	3	2	2	4	1	4	2
	569	2		4	2	1	4	4	1	1	1	2	4	4	4	1	2	4	4	4	2	4	2	1	2	2	2	1	2	1	2	4	2	2	3	2	2	2	2	1	2	2	1	4	2	1	4	2	2
	570	2		2	2	4	4	4	2	4	3	2	2	4	3	3	1	4	2	1	2	2	4	4	1	1	2	2	2	2	4	4	1	2	4	4	2	4	3	4	4	2	2	1	2	2	1	4	4
	571	2		1	2	4	2	2	4	4	2	2	4	2	2	2	2	2	2	2	4	2	2	2	1	4	4	4	2	1	4	1	4	4	3	4	1	2	2	4	4	2	4	1	2	3	4	2	1
	572	2		2	2	4	3	2	3	2	2	1	1	2	3	2	2	1	2	2	4	4	4	4	1	2	4	2	4	4	2	2	1	4	2	2	4	2	2	4	4	2	2	2	2	2	4	2	2
	573	2		2	4	2	2	2	2	2	2	2	4	2	2	2	1	2	4	4	1	2	4	4	4	2	2	2	4	2	2	2	2	3	4	4	2	4	4	2	4	2	2	2	2	2	2	2	2
	574	2		2	2	2	3	2	4	4	4	2	1	1	4	2	2	2	2	4	2	4	2	3	4	4	4	4	2	2	4	2	1	4	4	2	2	4	2	1	4	3	1	4	2	2	2	2	2
	575	2		2	4	1	1	1	3	4	1	4	2	2	2	4	4	2	3	4	2	4	2	2	2	4	1	2	2	1	2	2	4	2	4	2	4	4	2	1	1	4	3	4	2	4	2	2	4
	576	2		2	2	4	1	2	2	1	3	4	2	4	4	2	4	2	2	2	2	2	1	2	2	4	2	1	2	2	2	2	2	1	4	4	4	2	2	3	4	2	2	1	2	2	1	1	2
	577	2		1	4	4	2	2	2	2	2	4	2	2	4	2	1	2	2	4	3	2	2	2	2	2	2	1	4	2	4	1	4	4	2	3	4	2	2	3	2	2	2	1	2	2	2	4	2
	578	2		4	4	4	3	4	2	4	4	4	2	4	2	2	4	4	2	2	2	1	2	4	2	4	2	4	4	4	4	1	4	2	4	2	4	2	2	4	2	4	4	2	2	2	2	2	2
	579	2		1	2	2	2	4	4	2	2	2	2	2	4	2	2	4	3	2	2	2	4	2	2	1	2	4	2	2	3	4	4	1	2	1	2	4	3	2	2	1	4	1	2	2	2	1	2
	580	2		3	2	4	2	2	1	2	4	1	2	2	2	3	4	1	4	4	2	4	2	2	4	2	4	2	2	2	4	1	2	4	2	4	4	2	4	4	1	2	2	4	4	2	4	4	4
	581	2		3	2	2	3	4	2	2	2	1	4	4	4	2	3	4	4	2	2	2	1	4	4	1	2	2	2	1	3	4	2	2	2	4	3	1	4	1	2	2	1	2	4	1	3	2	2
	582	2		1	3	2	2	2	1	2	2	1	2	2	2	4	2	2	4	4	4	2	1	1	1	1	4	1	4	3	4	2	1	3	2	4	2	2	3	4	2	2	2	2	1	2	4	2	2
	583	2		2	4	4	1	1	2	2	1	4	2	2	2	4	2	2	4	4	4	4	2	2	2	3	2	2	2	1	4	2	2	4	2	2	2	1	2	2	3	3	1	2	2	2	2	4	4
	584	2		4	1	4	2	4	2	4	2	2	2	2	2	2	2	2	1	2	2	2	2	2	1	2	4	4	1	2	1	2	2	1	1	4	4	4	1	2	3	2	1	2	4	1	1	4	2
	585	2		4	4	2	1	2	4	1	2	2	1	4	2	1	2	4	2	4	1	2	4	4	2	2	4	2	1	2	2	2	2	1	2	4	2	4	4	1	2	2	1	4	2	2	4	4	1
	586	2		4	4	1	4	2	4	2	2	2	2	1	2	2	2	2	4	2	4	4	2	2	1	2	1	4	2	1	1	2	2	2	2	4	2	4	2	1	2	2	2	2	2	2	2	4	4
	587	2		2	2	4	3	4	3	4	4	2	1	3	1	4	2	2	4	4	4	4	2	4	4	2	2	2	3	2	2	2	4	2	4	2	2	4	1	2	2	1	2	2	2	1	2	2	4
	588	2		2	4	4	4	4	1	4	4	1	4	2	2	2	2	2	1	4	1	2	4	2	2	1	2	2	2	2	4	4	3	2	2	2	2	2	4	4	2	1	4	2	4	2	4	2	2
	589	2		2	2	2	2	2	2	4	2	2	4	1	1	4	2	1	2	2	2	2	1	1	4	2	2	2	2	2	3	4	2	4	1	2	2	3	4	4	1	2	3	2	4	2	2	1	2
	590	2		4	2	2	2	1	4	2	2	2	2	1	4	1	1	2	4	2	2	2	2	4	4	2	2	4	2	1	2	1	2	2	4	4	1	1	1	1	2	2	2	2	2	2	1	2	2
	591	2		2	4	2	2	2	2	2	3	1	1	2	2	4	4	2	4	2	4	2	1	2	2	3	2	2	1	3	2	2	4	2	2	4	4	4	2	4	1	2	2	4	2	4	2	1	2
	592	2		2	4	4	4	4	2	2	4	2	4	2	4	4	4	2	2	1	2	2	4	2	2	1	2	1	1	1	2	2	2	2	2	2	2	2	2	1	2	2	2	2	1	4	4	4	2
	593	2		4	2	3	2	2	4	2	2	3	2	2	1	3	4	2	4	4	2	1	2	4	2	4	4	1	2	2	2	4	4	1	4	2	4	2	3	1	4	4	1	2	4	2	2	4	2
	594	2		3	3	2	2	2	1	2	4	2	2	2	2	2	4	1	2	2	4	4	4	4	4	3	2	2	2	4	2	2	1	2	2	3	2	3	2	2	2	1	3	4	4	2	2	4	4
	595	2		2	2	2	2	4	4	3	2	2	1	2	4	2	4	4	2	4	4	1	4	3	2	2	2	2	2	4	4	4	1	1	2	4	2	4	4	3	2	3	2	4	1	2	2	1	4
	596	2		4	4	4	2	4	2	2	4	2	4	1	2	2	2	3	2	2	2	2	4	4	2	4	4	2	2	2	2	2	2	2	4	1	1	2	4	2	2	4	1	4	2	2	1	1	2
	597	2		4	2	4	2	4	1	1	2	4	2	4	4	4	1	2	4	1	2	4	4	1	2	2	2	4	3	2	1	2	2	2	2	4	2	3	2	4	1	4	4	2	3	2	1	2	4
	598	2		2	1	2	4	2	1	2	1	4	2	4	2	1	3	1	2	4	1	3	4	2	2	1	2	2	4	4	2	1	4	2	1	3	2	2	1	2	2	2	4	1	2	2	2	1	4
	599	2		2	2	3	2	2	4	4	2	4	4	4	2	2	1	4	2	4	1	4	4	4	2	2	1	2	4	4	2	2	1	2	2	2	4	2	4	2	1	2	1	2	2	2	2	2	4
	600	2		2	2	2	1	4	2	4	3	2	1	2	1	2	2	4	4	2	2	1	2	4	4	4	4	3	4	4	2	1	1	2	4	4	3	1	4	1	2	1	1	1	2	2	2	4	2
	601	2		2	4	2	4	2	1	4	2	4	2	4	3	1	2	4	2	4	2	1	4	4	4	1	2	1	1	3	1	4	1	3	4	3	4	2	4	2	2	2	2	2	4	1	1	2	2
	602	2		2	2	1	4	2	2	2	4	2	2	4	2	2	4	2	4	2	3	2	2	2	4	2	1	4	2	1	2	4	3	2	2	2	2	1	2	1	4	2	2	2	2	2	1	2	1
	603	2		4	3	2	2	4	3	4	1	4	2	2	2	2	2	2	4	2	1	1	3	1	2	4	2	4	2	2	1	1	2	2	1	2	2	4	2	3	1	2	1	2	4	1	4	4	3
	604	2		4	4	1	2	2	2	4	4	2	4	2	4	2	2	3	4	2	2	1	4	1	3	4	2	4	2	3	4	1	1	2	1	2	4	2	2	4	2	2	2	4	4	2	4	4	1
	605	2		4	4	4	4	2	2	1	4	4	4	2	4	1	2	2	2	1	2	1	4	4	2	2	1	4	2	2	3	2	2	2	2	2	1	4	3	2	2	2	4	4	2	2	1	4	2
	606	2		2	1	2	1	2	2	1	4	1	2	2	4	1	2	1	4	4	2	1	4	2	4	2	1	2	2	2	2	4	1	2	4	2	4	2	2	2	2	2	4	4	2	2	2	4	1
	607	2		2	1	4	2	4	2	2	2	1	2	2	2	1	4	2	4	2	2	4	4	4	4	2	2	2	2	3	1	2	2	1	4	2	4	1	1	4	1	2	2	1	4	2	2	4	1
	608	2		4	4	2	1	4	2	2	2	4	4	2	4	1	4	2	2	4	2	2	2	1	2	4	2	2	4	2	4	2	1	4	3	1	2	2	4	3	2	1	1	4	2	2	4	1	2
	609	2		4	2	2	2	1	2	1	4	2	2	2	2	4	4	2	1	1	2	2	4	2	2	4	1	2	4	2	1	2	1	4	2	4	2	4	2	4	4	2	3	4	2	4	2	4	1
	610	2		4	4	4	4	2	3	2	4	2	4	1	4	4	4	2	1	2	3	4	4	2	4	2	2	1	2	4	2	2	2	4	3	2	4	4	4	2	4	2	3	3	1	4	3	2	2
	611	2		4	2	2	2	4	4	4	2	2	4	2	4	1	4	1	1	2	4	2	2	2	1	2	1	1	4	2	4	2	2	4	4	4	3	4	2	2	4	4	2	2	2	4	2	4	4
	612	2		2	2	4	4	4	1	2	2	4	4	2	3	2	1	1	2	4	4	4	1	1	4	2	4	2	4	4	4	4	1	4	2	4	3	2	3	4	2	3	2	2	2	4	2	2	2
	613	2		2	4	4	4	2	4	2	2	2	2	2	4	2	2	2	3	1	1	2	1	2	2	2	2	2	4	2	2	1	2	1	3	4	2	3	4	2	4	2	1	4	2	1	2	2	2
	614	2		2	4	2	2	1	2	3	2	2	2	2	1	4	2	2	2	2	4	1	1	2	4	1	2	3	2	4	2	4	2	2	2	2	1	2	1	2	2	2	2	4	2	2	2	2	2
	615	2		2	2	4	4	2	2	2	1	2	2	2	2	4	3	1	3	4	2	2	2	4	1	2	2	3	2	4	2	2	4	4	3	4	2	1	2	2	1	1	2	2	1	2	2	4	1
	616	2		1	3	2	2	4	2	2	2	4	4	4	2	2	4	3	2	1	2	3	2	2	2	4	4	4	1	2	3	4	1	4	1	2	2	4	4	2	4	2	2	4	2	4	4	4	4
	617	2		2	2	4	2	1	1	1	1	4	2	2	4	2	1	2	4	4	2	4	4	4	2	2	2	2	2	1	2	2	4	2	2	1	2	4	1	2	1	4	2	4	1	4	2	4	2
	618	2		2	2	2	1	4	2	4	4	4	4	4	2	4	2	4	3	4	2	2	2	1	2	4	4	1	2	2	1	4	2	2	1	2	2	1	2	4	2	2	4	2	2	2	2	2	4
	619	2		2	1	2	4	2	2	4	4	2	2	3	1	2	4	4	4	4	2	1	4	2	4	1	1	2	3	2	4	2	4	2	4	4	4	2	4	2	1	2	4	4	2	1	4	4	2
	620	2		1	1	2	2	1	4	2	2	2	4	4	2	2	2	2	2	2	4	2	2	2	1	1	1	2	1	2	1	1	2	2	3	3	2	2	1	2	1	2	2	2	2	2	2	2	1
	621	2		4	4	2	2	2	2	4	2	2	4	2	4	1	2	2	2	4	4	2	2	3	4	2	2	4	2	4	2	4	4	2	4	4	4	4	1	4	2	2	4	2	1	4	2	4	1
	622	2		4	4	2	2	2	1	2	2	2	2	2	2	4	2	4	2	2	2	1	3	2	3	2	2	2	2	3	2	4	4	2	4	4	3	4	4	4	1	4	1	2	1	4	2	2	2
	623	2		4	2	3	4	2	1	2	4	2	2	2	4	3	4	4	4	4	1	1	4	4	4	1	1	1	4	2	4	4	4	3	2	4	2	3	4	1	2	2	1	2	4	3	4	2	2
	624	2		2	2	2	2	2	1	2	2	1	2	1	3	2	2	4	2	4	2	1	2	1	1	4	4	2	4	1	2	2	3	2	2	4	2	2	4	1	4	1	2	4	4	4	1	4	2
	625	2		2	2	2	2	2	1	2	4	2	4	2	2	2	1	4	4	1	1	4	4	2	2	2	2	4	2	3	2	2	4	4	4	2	4	2	1	1	2	4	2	4	4	4	2	4	2
	626	2		1	2	2	4	2	4	2	4	1	2	4	3	4	4	2	2	2	1	4	4	4	2	4	2	2	2	1	2	1	2	2	3	3	2	4	2	1	4	4	4	2	2	4	2	2	2
	627	2		4	2	2	4	2	1	2	1	4	2	2	2	4	4	4	2	4	2	4	2	2	4	3	4	4	2	2	3	2	2	2	2	1	2	4	4	1	2	2	1	2	2	4	2	3	3
	628	2		2	4	1	2	3	2	2	1	4	2	4	2	2	4	4	2	4	2	2	2	4	2	2	1	2	2	4	2	2	4	1	2	2	2	1	4	1	2	2	3	2	2	2	2	2	4
	629	2		2	1	4	2	4	3	1	1	4	2	2	2	2	2	4	4	2	4	4	2	4	2	4	2	1	2	4	2	2	2	1	2	2	1	2	2	2	4	1	2	4	4	4	2	2	2
	630	2		2	2	4	1	2	2	4	4	2	2	4	4	4	4	2	2	4	2	2	2	4	2	3	4	1	4	2	2	2	4	2	2	2	2	4	2	2	4	1	1	4	2	2	4	1	4
	631	2		3	4	2	1	1	4	2	2	4	1	4	2	4	2	2	2	4	1	2	1	2	2	2	3	4	2	2	4	2	3	4	2	2	2	4	4	2	4	2	2	1	2	2	2	3	4
	632	2		4	2	2	2	4	4	3	2	4	4	2	1	1	1	4	4	1	4	2	2	2	2	4	3	2	2	2	1	2	1	2	4	1	2	4	2	2	2	1	2	1	3	4	2	3	2
	633	2		1	3	2	2	4	2	4	4	2	2	4	2	4	2	3	4	4	2	1	2	2	1	4	4	1	1	1	2	1	1	2	1	3	4	1	2	2	2	2	3	2	4	2	4	2	3
	634	2		1	1	3	4	1	1	2	2	2	2	1	1	2	2	4	2	2	4	2	4	2	1	2	2	2	3	2	4	1	4	4	2	3	4	2	4	3	1	2	2	4	2	2	2	2	1
	635	2		2	2	3	2	2	2	2	4	2	4	4	4	1	3	2	4	2	2	2	1	2	4	2	4	3	4	2	1	1	1	3	3	2	3	3	4	2	3	2	3	2	2	4	4	4	3
	636	2		4	2	1	2	2	2	2	2	2	3	2	4	2	4	4	2	1	2	4	1	4	2	2	4	4	2	2	2	1	1	2	4	4	1	4	2	4	4	4	2	1	2	4	4	2	2
	637	2		3	1	2	1	2	2	1	2	2	4	1	2	2	2	2	4	4	1	2	2	2	2	3	2	4	1	2	2	2	2	1	2	2	1	2	1	2	2	2	2	2	1	4	4	4	2
	638	2		3	3	2	1	2	4	3	2	2	3	4	2	2	4	4	1	4	2	2	2	1	1	2	4	4	2	4	2	2	4	4	2	2	1	4	4	4	2	3	2	4	1	4	2	2	2
	639	2		4	2	2	2	4	2	1	4	1	2	2	2	2	2	1	2	2	2	2	2	2	2	2	3	2	4	4	1	3	1	2	4	2	4	4	2	2	1	3	4	2	1	2	2	4	2
	640	2		2	4	4	4	3	4	4	2	2	4	3	2	4	2	4	2	2	1	3	3	4	1	4	4	1	2	3	2	4	4	4	2	2	4	1	2	1	2	4	4	2	1	2	4	1	2
	641	2		4	3	4	2	2	4	3	4	2	2	2	3	2	3	1	2	3	4	4	2	1	3	2	4	2	2	2	1	4	2	4	4	4	1	1	4	2	2	1	4	2	4	3	4	4	3
	642	2		4	4	2	1	1	3	2	4	1	2	2	2	2	2	4	3	4	4	2	2	4	2	4	2	2	4	4	2	3	2	2	2	1	2	4	2	4	1	2	1	2	1	4	1	4	4
	643	2		4	2	1	4	2	2	1	1	2	2	4	4	4	4	2	2	1	4	2	1	2	1	2	2	3	4	4	2	1	4	1	4	2	2	2	4	2	2	4	2	4	2	2	3	4	4
	644	2		2	2	3	3	2	1	2	4	3	2	2	1	1	2	1	2	4	1	4	4	4	4	2	1	2	2	2	2	2	1	2	2	2	4	4	1	4	4	2	4	4	2	2	2	4	3
	645	2		2	2	2	2	1	4	2	2	2	1	1	2	1	1	2	2	2	2	3	4	4	2	3	2	2	4	4	1	2	1	4	2	2	2	2	4	2	2	2	1	2	3	1	2	4	2
	646	2		2	2	2	1	2	4	1	4	4	1	1	2	4	4	2	1	1	2	1	2	4	2	1	2	3	4	1	1	3	2	4	2	4	2	2	2	2	1	1	4	4	2	2	2	1	1
	647	2		4	2	2	4	4	1	2	2	2	2	4	2	2	2	1	2	2	2	2	1	3	1	1	4	3	2	2	2	1	4	2	4	2	2	4	4	1	1	2	1	4	4	2	4	1	4
	648	2		2	2	1	4	3	4	4	4	4	4	2	1	4	4	2	4	1	2	2	2	2	3	3	4	2	4	4	1	2	2	2	3	1	4	2	2	4	1	2	2	2	3	4	2	4	2
	649	2		2	2	4	2	4	4	3	2	4	2	4	2	2	2	1	2	2	4	2	1	2	4	2	4	2	2	2	4	2	4	2	2	2	3	2	4	4	3	3	2	4	4	1	4	4	3
	650	2		3	1	3	1	4	4	2	4	4	2	4	2	2	2	4	2	2	2	1	2	2	4	2	2	2	2	2	4	1	1	3	1	2	4	2	2	2	1	4	2	2	2	4	2	2	1
	651	2		2	2	3	4	3	4	4	2	4	4	1	4	2	2	3	3	4	4	2	2	2	2	2	2	4	1	2	2	2	4	2	3	1	4	4	4	4	4	4	2	2	1	1	2	2	4
	652	2		2	3	2	2	1	2	1	2	4	4	1	2	3	2	3	4	2	2	2	2	1	2	2	2	1	1	2	4	2	4	3	1	1	4	1	2	2	2	2	4	4	2	2	1	4	2
	653	2		1	1	4	2	4	2	4	2	4	4	2	4	2	2	2	2	1	4	1	2	4	1	2	4	2	2	2	4	2	4	3	2	4	1	3	1	2	2	4	4	2	2	4	2	1	4
	654	2		4	4	4	2	2	3	2	2	2	2	2	4	2	1	2	2	2	1	4	2	4	2	2	2	3	4	4	2	4	4	2	2	2	2	4	1	2	4	4	4	2	4	4	4	2	3
	655	2		2	2	2	4	1	4	2	1	1	4	2	4	4	2	3	4	2	1	1	2	4	4	2	4	3	2	2	2	4	2	4	4	2	2	1	2	2	2	4	2	4	2	2	2	4	4
	656	2		1	2	2	4	1	2	4	2	4	4	2	1	4	3	2	2	2	2	4	2	2	4	2	2	2	1	4	2	3	4	1	4	2	2	4	4	2	3	2	2	1	2	2	4	2	4
	657	2		4	2	4	1	2	2	4	4	1	2	1	2	2	1	2	3	3	1	2	3	4	2	4	4	2	2	4	2	2	2	4	3	2	4	1	4	2	2	2	2	2	2	4	2	2	4
	658	2		4	1	2	2	1	4	4	2	4	2	1	2	2	1	2	2	2	2	2	2	4	4	2	4	3	2	4	2	4	1	2	1	3	1	4	2	2	2	2	1	2	2	4	2	2	2
	659	2		4	2	2	3	3	1	4	2	2	2	2	2	4	2	2	2	4	1	2	2	2	4	2	2	2	2	2	2	4	2	2	2	4	4	4	4	2	2	4	4	2	4	4	3	1	2
	660	2		1	4	1	2	2	2	2	2	4	2	2	1	4	1	1	1	2	4	4	1	4	4	1	2	4	1	2	4	4	2	2	1	2	2	1	2	2	4	4	4	4	2	4	4	1	1
	661	2		3	4	4	4	4	4	2	2	1	4	4	4	2	2	2	1	1	4	3	4	4	1	2	2	2	2	4	4	2	2	4	2	4	2	2	1	4	2	2	1	2	3	2	2	1	1
	662	2		4	4	4	1	1	1	2	2	2	4	3	1	4	2	2	4	3	1	2	4	2	2	2	1	2	2	2	4	2	4	2	2	2	2	4	4	4	2	2	1	4	4	2	4	4	3
	663	2		4	4	4	2	4	1	1	2	1	2	2	3	4	3	2	2	4	2	4	2	1	4	3	2	1	2	4	2	2	4	2	4	2	4	1	2	4	4	2	4	2	2	4	4	2	4
	664	2		4	2	1	1	2	1	2	4	2	2	1	2	1	2	2	4	4	2	3	4	1	3	2	2	4	1	2	4	2	4	1	2	2	2	1	1	2	2	4	2	2	4	2	2	4	2
	665	2		2	4	4	2	2	2	4	1	2	2	2	2	1	4	2	2	2	4	2	1	4	2	4	2	4	4	2	4	2	2	2	2	4	2	2	1	2	4	2	1	2	3	2	2	4	2
	666	2		2	1	1	3	1	4	4	2	2	1	2	2	2	3	3	4	2	2	1	1	3	4	2	2	3	4	2	2	2	2	2	4	1	4	2	2	4	2	1	4	2	2	1	2	1	2
	667	2		2	4	4	4	2	2	2	1	2	3	2	4	2	4	1	2	2	2	2	4	2	2	4	2	2	4	2	1	2	1	4	4	2	1	2	2	4	4	2	2	4	1	4	4	2	4
	668	2		4	4	4	4	4	2	4	4	4	2	4	2	4	1	4	2	3	1	2	1	4	2	2	4	2	4	2	2	4	4	2	2	2	2	4	2	2	2	2	2	2	1	2	2	2	4
	669	2		1	2	2	4	2	4	4	4	1	4	4	2	4	2	1	2	1	4	4	4	4	2	2	4	2	2	2	3	4	2	4	4	4	2	1	1	2	2	2	3	2	4	4	2	4	3
	670	2		2	4	2	2	4	2	3	1	2	1	2	3	1	2	2	4	2	4	4	1	2	1	4	2	4	4	4	4	4	2	2	2	2	2	2	2	3	1	4	4	2	1	2	2	2	2
	671	2		1	2	4	3	4	4	1	4	1	4	4	1	1	4	4	2	1	2	3	2	1	2	2	4	2	1	4	2	2	3	2	1	4	4	1	1	3	4	2	1	2	2	3	4	4	2
	672	2		1	2	4	2	3	2	2	2	2	1	2	2	1	2	2	2	2	2	4	1	2	2	3	2	3	4	3	4	1	1	1	1	1	2	1	2	2	2	4	2	2	4	2	4	2	1
	673	2		4	2	1	1	2	2	2	1	1	2	1	2	4	4	4	4	2	4	4	1	4	2	4	3	3	1	2	2	4	2	4	2	1	2	4	2	2	1	2	2	2	4	2	2	2	1
	674	2		2	1	2	1	2	2	2	2	4	4	2	2	2	4	1	2	2	1	2	2	2	4	2	4	2	1	4	3	4	4	2	4	2	2	2	2	4	2	4	2	2	2	2	4	4	4
	675	2		2	1	1	2	4	2	4	2	2	2	2	2	2	1	1	2	2	2	2	2	2	2	2	3	2	4	3	2	4	2	4	3	2	4	2	2	2	2	1	4	2	2	1	4	4	4
	676	2		1	4	2	1	3	2	2	2	1	1	4	4	4	2	2	2	2	3	1	2	2	1	2	1	2	1	2	2	1	4	2	2	2	2	4	2	1	3	4	2	1	4	4	4	1	4
	677	2		3	2	1	4	2	2	2	2	1	1	2	2	2	2	4	2	4	2	2	1	2	4	2	2	2	4	2	2	1	2	1	4	2	2	2	2	4	2	2	4	2	4	4	2	2	2
	678	2		2	2	4	2	2	1	3	2	1	4	2	2	3	2	2	3	2	4	1	2	2	2	1	4	4	4	2	4	2	2	2	2	2	2	4	4	2	4	2	2	4	2	4	2	4	2
	679	2		2	2	1	2	2	3	4	2	2	2	4	4	4	1	3	3	2	2	4	4	3	1	4	4	2	4	2	4	1	4	2	2	2	2	1	3	2	2	4	2	2	1	2	4	4	4
	680	2		1	2	2	2	4	4	2	4	4	2	2	2	4	2	1	4	2	1	3	1	4	2	1	3	1	2	1	2	4	4	1	2	2	4	2	3	4	2	2	2	4	3	2	1	2	4
	681	2		2	1	1	2	3	4	4	2	2	4	2	1	2	2	1	2	2	2	1	1	2	2	1	2	3	4	4	2	3	2	1	3	2	4	2	3	2	2	2	2	2	2	2	4	4	4
	682	2		4	2	4	4	2	1	1	3	2	2	2	2	4	1	4	4	2	2	1	4	2	4	4	4	1	4	2	2	1	3	2	4	2	2	4	3	4	1	4	2	2	3	4	4	2	3
	683	2		2	2	3	2	2	2	2	2	3	1	4	2	1	2	2	2	4	2	2	4	2	3	2	1	2	4	2	4	4	4	2	2	2	4	4	2	2	2	2	1	2	2	2	2	1	1
	684	2		2	4	4	2	3	3	2	2	4	2	2	2	4	4	4	2	1	2	4	2	1	4	4	2	3	2	2	2	4	2	2	1	1	1	4	2	2	4	2	4	4	4	2	4	2	4
	685	2		1	1	2	2	2	2	3	4	2	3	4	2	3	4	2	2	2	3	2	4	4	4	2	2	4	1	4	2	2	4	2	4	4	2	3	2	4	4	2	2	3	2	3	1	2	2
	686	2		2	1	2	4	2	2	1	4	4	2	2	4	2	3	4	4	4	1	3	1	1	4	3	1	2	2	2	2	3	2	4	1	3	2	1	4	1	2	2	4	2	4	4	4	4	4
	687	2		4	2	2	2	1	2	4	3	3	2	4	2	2	2	1	3	4	4	4	4	3	2	2	1	4	4	4	2	2	4	2	2	2	2	1	1	2	2	2	2	2	2	4	3	2	4
	688	2		1	4	2	4	2	1	1	4	4	2	2	2	1	3	1	2	3	4	2	2	2	2	4	2	4	2	4	2	2	2	4	2	4	2	4	4	4	4	4	1	4	4	2	4	2	4
	689	2		2	1	2	1	1	2	1	4	2	4	2	4	2	1	3	2	2	2	4	4	3	2	3	2	2	4	2	2	1	4	2	4	2	2	4	4	2	1	2	4	2	2	2	2	2	4
	690	2		2	2	4	4	4	1	2	2	2	2	1	1	1	2	2	2	2	3	2	2	3	2	4	2	2	4	4	4	2	2	4	2	3	2	1	4	4	4	2	4	4	3	4	2	4	2
	691	2		2	2	2	4	2	4	1	4	1	4	2	4	2	2	2	2	2	4	2	3	2	2	2	4	4	2	1	2	1	2	2	4	2	1	1	4	1	2	2	2	4	1	4	4	2	4
	692	2		4	2	2	2	3	2	2	2	4	4	4	4	1	2	1	4	2	4	2	2	1	4	1	2	1	2	2	4	2	2	2	1	4	4	2	2	2	2	2	2	3	4	4	2	2	1
	693	2		4	1	4	2	4	4	2	2	4	2	2	4	2	1	4	2	2	1	4	2	1	2	2	4	4	2	4	2	2	4	1	2	4	2	4	1	4	2	4	4	2	4	1	3	2	2
	694	2		1	2	2	2	4	2	4	4	2	2	2	2	3	3	2	2	3	2	2	2	2	2	2	2	4	2	4	2	3	2	2	4	2	4	2	4	2	1	2	2	4	1	4	2	4	4
	695	2		3	4	1	4	2	2	2	1	2	1	2	2	2	4	2	4	1	2	4	2	1	2	2	2	1	1	4	4	1	1	2	4	2	2	4	1	1	2	4	2	1	2	4	4	1	2
	696	2		2	1	4	4	2	1	2	4	2	4	3	2	1	2	2	4	1	2	4	2	4	2	4	2	2	1	2	1	1	4	2	2	4	4	2	1	2	2	2	2	2	1	4	4	2	3
	697	2		2	4	2	4	2	4	3	2	2	2	2	1	3	2	1	2	1	4	4	4	2	4	4	2	2	4	2	3	2	2	2	1	2	1	2	4	2	4	1	4	2	1	4	2	2	2
	698	2		1	1	2	2	2	1	2	2	1	4	1	2	1	2	3	2	1	4	1	2	3	2	4	4	4	2	2	2	4	2	2	2	2	2	2	1	3	2	2	3	2	3	4	2	2	2
	699	2		2	2	4	2	4	2	2	2	1	2	2	4	2	4	4	3	2	4	2	4	2	2	1	4	2	4	2	1	2	4	2	4	2	1	2	2	4	2	1	4	2	3	4	2	2	2
	700	2		4	2	2	2	4	2	2	2	2	2	2	1	2	4	2	2	1	2	1	4	2	3	1	2	2	2	2	2	1	1	4	4	2	4	2	2	2	2	2	4	4	1	1	2	4	4
	701	2		2	2	2	2	4	2	2	2	2	2	1	4	2	2	2	3	2	4	2	1	2	2	3	4	2	2	1	2	4	1	2	3	2	4	2	1	1	4	2	2	1	1	4	2	4	2
	702	2		2	2	2	1	2	2	2	4	3	4	1	2	2	2	1	3	4	4	2	2	1	2	4	4	2	4	1	2	4	2	2	2	4	4	2	1	1	2	4	4	3	2	4	2	4	2
	703	2		4	4	4	4	2	4	1	4	2	4	1	4	2	2	2	4	4	2	4	2	4	2	2	2	2	4	2	2	2	1	1	2	2	2	3	2	1	4	2	4	2	2	2	2	4	2
	704	2		1	2	4	4	1	4	4	2	1	2	2	4	1	2	3	2	4	3	2	1	4	2	4	2	2	2	2	2	4	4	2	2	2	1	2	2	2	1	2	4	2	2	2	2	1	2
	705	2		4	2	4	1	4	3	2	2	1	4	2	4	2	2	3	2	4	4	4	3	2	3	2	2	2	4	4	2	2	4	3	3	4	1	2	4	2	2	2	1	4	1	2	4	2	4
	706	2		2	2	2	4	2	4	1	2	4	2	2	1	4	2	4	3	2	2	1	2	1	1	4	2	4	4	2	3	2	4	1	2	4	2	2	4	1	4	4	3	2	4	2	2	2	2
	707	2		4	1	4	4	2	2	4	2	3	2	4	2	2	2	2	4	4	1	2	2	2	3	2	3	4	2	2	4	2	3	4	4	4	2	4	4	2	4	4	4	2	4	4	2	4	2
	708	2		1	4	2	3	4	4	4	4	1	2	2	2	3	4	4	2	4	4	2	2	1	2	1	2	2	1	2	2	3	1	1	3	2	2	4	4	2	2	2	3	4	4	4	2	4	4
	709	2		4	4	2	4	2	4	2	3	2	3	2	4	4	3	4	2	2	4	2	2	2	4	2	2	4	2	2	2	2	2	3	4	2	4	1	2	2	2	4	2	2	2	2	4	4	2
	710	2		2	2	2	1	2	4	2	1	2	3	4	2	3	2	4	2	2	3	2	4	4	2	2	4	2	2	2	4	4	2	4	2	2	2	2	4	4	1	2	4	2	2	4	1	2	4
	711	2		2	2	2	4	4	4	1	2	2	4	4	2	4	4	2	2	2	3	4	4	4	2	3	2	4	2	2	2	2	4	2	4	2	2	2	2	2	2	3	2	2	1	2	2	4	1
	712	2		3	4	4	4	1	4	4	1	4	4	3	4	4	2	2	2	2	4	3	4	1	2	2	4	4	4	4	2	2	4	1	2	4	2	4	2	2	2	2	4	2	1	1	2	2	3
	713	2		2	4	1	1	2	2	4	1	2	4	2	2	4	2	1	4	2	2	4	3	4	2	2	2	1	2	1	2	4	2	2	4	2	2	4	1	4	4	1	4	2	2	1	4	2	2
	714	2		2	2	4	2	1	2	2	4	2	4	2	2	4	3	2	3	1	2	3	2	4	4	4	4	2	2	2	2	2	2	1	4	4	2	2	2	2	2	2	2	4	2	4	3	2	2
	715	2		3	2	4	4	1	1	2	4	2	4	2	3	2	2	2	3	4	3	1	2	1	4	4	2	2	1	2	2	3	1	2	4	2	2	4	1	4	2	2	2	2	4	2	1	2	4
	716	2		1	1	3	2	2	2	2	2	1	4	4	2	1	2	3	1	2	3	1	4	3	2	2	2	3	1	2	2	2	2	4	2	2	4	2	2	1	2	2	2	2	4	4	4	2	2
	717	2		4	2	1	1	4	2	4	2	4	2	2	3	1	2	2	1	2	1	4	1	4	4	2	3	1	2	3	2	2	4	2	2	1	4	4	4	4	4	3	2	2	4	4	1	2	2
	718	2		3	2	2	4	1	2	2	2	2	4	4	1	2	4	4	2	1	2	1	2	2	2	4	2	4	1	1	2	1	2	2	2	2	2	2	2	3	2	2	1	4	2	4	1	3	4
	719	2		4	1	1	2	4	4	4	1	4	2	4	4	1	2	2	1	3	2	2	4	2	2	3	2	2	4	1	4	2	3	2	1	1	1	2	2	4	4	1	2	2	4	2	2	4	4
	720	2		2	2	1	3	2	1	2	4	4	2	4	2	4	2	1	4	4	2	2	2	2	2	2	1	4	1	3	2	2	4	2	2	4	4	3	2	1	2	3	2	2	1	2	2	2	2
	721	2		4	2	2	3	2	3	4	2	1	2	2	2	1	2	1	2	2	1	1	2	2	2	2	4	2	2	4	2	3	2	2	4	2	2	3	1	1	1	4	2	2	4	2	2	4	2
	722	2		2	3	2	3	4	4	2	1	1	2	2	1	2	2	3	2	2	3	4	2	1	2	2	2	2	2	4	1	2	2	2	4	4	2	2	1	4	3	2	4	4	4	2	2	1	2
	723	2		3	1	4	2	2	4	2	2	1	4	2	1	2	2	2	4	2	4	2	4	2	2	3	2	2	2	2	2	4	4	1	2	1	2	4	2	2	1	1	4	4	2	4	2	2	2
	724	2		1	4	4	2	4	2	2	4	3	1	2	2	4	2	2	1	3	2	4	4	4	1	2	4	3	3	1	4	4	3	1	2	2	4	4	4	1	4	1	2	2	2	2	3	4	2
	725	2		4	2	1	1	3	4	2	2	2	2	2	2	1	2	4	4	3	4	4	2	1	1	2	4	4	2	1	4	4	2	4	4	3	2	2	4	4	4	2	3	4	4	2	4	1	2
	726	2		3	2	1	4	4	4	4	2	2	2	4	4	2	2	4	4	1	1	2	2	2	4	1	4	2	4	2	2	2	2	1	4	1	1	3	3	4	1	2	1	2	2	2	2	2	1
	727	2		2	2	4	4	2	2	2	1	4	4	4	2	2	2	3	2	2	4	2	2	1	1	4	2	4	2	1	2	3	4	1	2	2	4	2	4	4	2	4	1	2	4	2	3	4	1
	728	2		2	2	2	2	1	4	2	4	2	1	4	1	2	4	2	4	1	4	2	2	1	1	4	4	4	4	1	2	2	4	2	2	4	2	2	2	4	4	2	2	2	4	4	1	2	4
	729	2		4	2	2	2	3	3	2	4	4	3	2	2	2	4	4	2	2	2	4	3	3	2	2	1	2	2	2	4	4	2	2	2	3	2	1	4	4	1	2	2	2	2	2	4	1	2
	730	2		4	2	3	2	2	2	4	4	4	2	4	2	2	2	2	2	2	2	4	2	2	1	1	4	3	2	2	2	3	2	3	4	1	1	2	2	4	2	4	2	2	3	4	2	1	2
	731	2		1	2	2	3	2	1	4	1	2	3	2	2	3	4	1	2	2	2	4	4	2	4	2	1	4	4	2	3	4	2	4	2	4	2	4	4	4	4	4	1	4	2	2	2	2	2
	732	2		4	2	1	4	4	2	2	2	4	2	2	4	1	2	1	4	2	4	4	4	2	4	1	3	2	4	4	2	4	4	2	1	4	2	4	2	2	2	2	1	4	2	2	1	2	2
	733	2		1	2	2	2	2	2	1	4	4	4	2	2	4	1	4	4	2	2	2	2	1	2	2	3	4	4	1	4	2	1	4	1	2	4	1	2	4	4	2	2	4	2	2	4	2	4
	734	2		4	4	4	1	1	2	2	4	1	4	2	2	2	4	1	2	2	4	2	2	3	3	2	1	4	2	4	2	2	1	1	2	2	1	2	4	4	2	2	2	2	4	4	2	2	4
	735	2		2	4	2	4	2	2	3	4	4	1	1	1	2	4	2	4	2	4	2	2	2	2	2	2	1	4	2	4	2	2	4	1	2	1	4	2	2	2	4	4	4	4	3	4	3	4
	736	2		2	2	2	1	2	1	2	2	2	4	2	2	1	2	4	2	1	1	4	2	4	1	2	1	2	3	2	2	4	1	1	2	2	1	4	2	4	2	1	1	2	2	2	4	2	2
	737	2		2	4	2	1	2	4	2	2	2	2	2	2	2	4	2	2	1	2	4	4	2	1	2	4	4	1	2	2	1	2	2	4	2	2	2	3	2	1	1	2	1	1	3	4	1	4
	738	2		2	4	2	2	2	2	2	4	3	4	4	1	4	4	2	1	4	4	2	2	1	4	4	2	2	2	1	3	2	2	3	2	2	4	2	4	1	2	2	1	2	3	2	2	1	1
	739	2		4	1	2	4	2	1	2	2	2	2	1	2	4	4	3	2	2	1	4	2	1	2	1	2	1	4	4	4	2	2	4	1	1	4	2	1	2	2	2	4	4	4	2	1	4	2
	740	2		2	4	2	1	3	3	4	4	2	1	2	4	4	2	2	4	1	2	2	4	2	2	2	4	3	3	2	1	2	1	4	3	2	3	2	2	4	2	4	3	4	1	4	2	3	4
	741	2		4	4	2	4	4	2	4	1	2	3	2	2	2	4	3	4	2	4	4	2	3	2	2	1	1	1	4	4	2	2	2	4	2	2	1	2	4	4	2	2	2	4	2	2	2	2
	742	2		4	2	2	3	4	4	2	1	4	4	4	1	4	1	3	2	2	4	2	4	2	1	1	1	1	2	2	2	4	4	3	2	4	4	2	2	2	2	2	2	2	4	4	4	2	2
	743	2		4	4	2	2	4	2	2	2	1	1	4	4	4	4	2	2	4	4	3	4	4	4	1	2	2	2	2	2	4	2	3	1	2	2	4	2	4	4	2	2	2	2	4	2	2	4
	744	2		4	1	2	2	2	2	1	2	2	1	3	2	2	4	4	3	1	4	4	2	4	3	2	2	2	2	1	4	4	1	2	4	1	1	2	2	2	4	4	2	2	3	2	4	4	4
	745	2		2	4	4	2	2	2	2	2	2	4	4	2	4	2	2	1	2	4	2	4	1	4	3	4	2	4	2	2	1	1	3	4	2	1	4	2	4	4	2	2	4	4	4	2	4	2
	746	2		2	2	2	3	4	2	1	1	3	2	4	4	4	2	1	2	1	2	4	2	4	2	2	2	2	4	1	2	2	4	3	1	4	2	3	2	1	2	1	2	2	1	1	1	1	4
	747	2		4	4	1	1	2	1	4	4	2	3	4	2	4	4	3	1	2	2	2	4	4	1	2	1	2	4	2	2	4	2	1	2	4	4	1	2	2	3	3	3	2	2	4	2	1	2
	748	2		3	2	2	2	4	2	4	2	1	4	2	2	1	4	3	4	2	2	4	1	1	2	2	1	2	3	2	4	2	4	1	2	4	1	2	1	2	3	2	2	1	4	4	2	4	2
	749	2		4	4	2	2	3	4	2	4	2	1	2	2	2	2	4	2	3	1	2	2	2	2	2	4	2	4	2	2	2	2	4	1	1	2	2	1	4	4	1	2	4	2	3	1	1	2
	750	2		4	4	2	4	1	2	4	4	1	2	2	1	1	3	2	2	2	4	1	2	2	2	2	2	4	2	3	2	2	1	3	2	1	2	4	2	1	4	2	2	2	2	4	2	2	2
	751	2		4	1	4	4	2	3	2	4	4	4	4	2	2	2	4	2	4	4	1	4	3	4	4	4	1	4	2	2	4	4	1	2	2	2	1	2	4	2	2	3	2	2	2	2	2	1
	752	2		4	4	4	2	2	2	1	2	1	2	2	4	2	4	1	1	2	4	2	2	4	1	2	2	4	2	4	2	4	4	1	3	4	1	2	4	2	2	4	4	2	2	4	4	1	4
	753	2		2	4	2	2	1	4	3	4	4	1	1	2	4	4	1	4	2	2	1	4	4	4	2	4	1	1	2	2	4	2	1	4	1	4	4	1	2	2	2	2	4	3	1	4	2	4
	754	2		2	3	4	2	1	3	2	2	4	1	1	2	3	4	4	4	2	2	4	4	2	1	4	2	2	2	4	1	1	1	1	4	2	2	4	2	4	2	4	1	4	4	2	2	1	2
	755	2		2	3	2	4	2	2	1	4	4	2	2	1	2	2	4	2	2	4	4	2	2	4	2	4	4	2	2	2	1	4	4	1	2	2	2	2	2	1	2	1	2	2	1	1	4	2
	756	2		2	2	4	4	1	1	4	4	1	2	2	4	2	2	1	1	2	2	2	2	4	2	4	2	4	3	2	1	2	2	2	4	1	3	2	3	4	1	4	4	2	2	2	2	2	2
	757	2		2	2	2	1	2	4	2	1	2	2	4	1	2	2	1	4	4	2	3	3	4	2	2	4	2	2	2	4	2	2	2	4	1	3	3	4	1	2	1	2	1	1	2	2	1	2
	758	2		2	4	2	2	3	3	1	2	2	2	2	4	3	4	1	2	4	4	2	1	2	1	2	1	4	1	4	2	2	4	2	2	2	1	1	2	4	3	2	2	4	4	2	4	2	2
	759	2		2	4	4	4	2	1	2	2	2	2	4	2	4	2	2	4	2	4	3	4	2	2	1	1	2	3	4	2	1	2	2	1	4	1	4	2	4	1	3	4	2	3	3	2	4	2
	760	3		2	1	2	4	4	2	2	1	1	4	1	1	1	3	2	4	1	4	4	2	4	4	2	1	2	1	2	2	2	2	4	1	4	2	2	1	2	4	1	4	2	2	2	4	2	4
	761	3		2	4	4	4	1	4	2	2	4	2	1	2	2	4	2	3	4	4	1	2	4	1	2	4	4	2	2	4	4	2	2	4	2	2	2	2	4	4	1	2	1	4	2	4	2	1
	762	3		2	4	2	1	4	2	4	1	2	2	2	4	1	2	2	4	2	4	2	2	4	2	2	4	2	2	2	2	4	2	1	3	4	4	4	1	2	1	2	1	4	1	4	4	4	2
	763	3		1	1	4	2	4	4	4	3	1	4	2	4	4	2	4	1	4	4	4	2	2	4	4	2	2	4	4	2	2	2	2	2	4	4	2	2	2	4	1	2	4	2	4	2	4	2
	764	3		2	3	2	2	1	4	4	2	2	4	4	2	4	1	2	2	2	1	2	2	1	4	2	4	4	2	3	4	4	4	2	4	2	1	4	2	2	4	2	2	3	2	4	4	4	2
	765	3		3	4	1	4	4	2	2	2	2	2	2	1	4	2	2	2	2	2	4	2	2	4	2	1	1	3	2	3	4	2	2	4	1	2	4	1	2	1	2	3	4	2	2	4	3	2
	766	3		1	4	4	2	3	4	2	4	3	3	2	4	2	4	4	2	2	2	4	4	2	1	2	3	2	4	2	4	2	2	2	4	2	1	3	2	4	2	4	2	1	4	4	2	4	4
	767	3		2	4	4	4	2	2	1	3	2	2	1	2	4	4	2	1	2	1	2	4	1	2	3	3	1	4	4	2	2	2	2	2	4	2	4	2	4	4	4	1	2	2	4	4	1	1
	768	3		2	4	1	2	4	2	1	1	1	2	2	2	2	1	1	4	4	2	4	1	4	4	2	2	4	2	4	2	4	2	4	2	1	1	1	1	2	2	1	4	4	2	1	4	2	4
	769	3		4	2	1	4	2	1	2	2	4	2	2	1	2	4	3	4	3	2	4	2	3	4	4	3	1	2	4	4	2	2	2	2	3	4	2	2	2	3	1	2	2	3	4	2	1	1
	770	3		2	4	2	2	2	1	2	2	2	2	4	4	2	4	4	4	2	2	3	4	2	4	2	2	4	2	1	1	2	2	2	2	4	2	2	2	3	2	1	4	2	4	1	4	2	4
	771	3		4	4	2	4	2	4	1	2	4	3	1	1	2	4	1	2	2	3	2	2	4	1	2	4	1	2	2	4	2	3	2	1	2	1	4	2	1	4	2	3	2	1	4	2	4	4
	772	3		4	4	2	1	4	1	4	3	1	4	2	4	4	2	4	4	2	2	4	1	2	2	2	2	1	1	2	4	1	3	4	2	2	1	2	4	2	1	1	4	3	2	2	4	2	4
	773	3		4	4	2	2	2	4	2	3	1	4	4	4	1	3	4	2	3	4	2	3	4	4	2	2	2	2	2	1	2	2	3	1	4	1	2	3	1	2	4	4	2	2	2	4	4	2
	774	3		2	1	4	2	1	1	3	4	1	2	2	4	2	4	2	2	2	2	4	2	2	2	4	3	1	2	3	2	1	3	1	3	2	1	4	2	3	1	2	2	2	1	4	4	2	4
	775	3		2	2	4	2	2	2	4	2	1	4	4	2	2	3	4	2	2	2	2	1	4	1	3	3	2	4	4	4	4	1	4	2	1	2	1	2	3	4	2	4	1	2	1	2	2	4
	776	3		4	3	2	4	2	4	1	2	2	4	1	1	1	4	2	1	1	4	4	4	1	4	4	4	3	4	4	1	2	4	2	4	1	1	2	2	1	2	4	1	2	3	2	2	4	2
	777	3		3	4	3	2	2	2	4	1	4	4	2	2	4	2	4	2	1	2	1	2	2	2	2	1	2	2	3	2	3	2	2	2	4	4	4	2	2	1	2	2	4	4	2	4	2	4
	778	3		2	2	4	4	2	2	1	2	2	2	1	2	2	1	2	1	2	2	2	4	4	2	4	2	4	4	1	2	4	1	1	2	2	2	3	2	4	3	2	2	4	4	2	2	1	4
	779	3		3	3	4	2	2	1	2	1	2	4	1	3	4	2	1	3	2	2	1	4	2	4	2	2	2	2	2	4	4	1	2	2	2	4	2	4	3	4	4	1	2	4	4	4	4	2
	780	3		2	3	4	2	4	4	4	2	3	2	4	4	2	2	4	4	1	2	2	1	4	2	4	2	2	3	4	1	2	2	2	2	2	1	2	4	2	3	3	2	2	3	2	1	4	2
	781	3		4	2	4	2	2	4	2	2	2	1	2	2	1	2	4	3	2	2	4	4	2	4	4	4	4	4	3	1	2	4	2	4	2	2	4	2	2	2	2	2	1	4	2	4	4	2
	782	3		2	2	3	2	1	4	2	2	4	4	2	1	2	1	3	2	4	4	2	2	1	4	1	2	1	2	2	1	4	2	4	4	2	2	2	4	2	2	2	4	4	2	2	4	2	2
	783	3		3	2	3	2	2	1	4	4	2	4	4	1	1	1	4	2	4	2	2	2	4	3	2	2	2	4	4	4	4	4	4	1	2	1	2	2	1	4	2	2	2	2	2	2	1	3
	784	3		2	4	1	2	4	2	2	4	4	2	2	4	2	4	2	4	2	4	4	2	1	2	1	2	2	4	3	2	2	4	2	4	2	2	2	2	3	2	2	1	1	2	4	2	1	4
	785	3		4	2	4	2	2	4	4	1	3	4	2	1	3	3	2	4	4	4	2	4	2	4	4	2	4	2	2	4	2	4	2	2	4	2	2	2	2	2	2	2	1	2	2	1	2	4
	786	3		2	1	1	1	3	3	2	2	4	2	2	2	2	2	4	4	4	2	2	1	2	3	4	4	4	2	2	2	2	3	4	2	2	1	1	2	1	2	2	3	4	2	2	1	4	2
	787	3		3	2	1	4	2	2	2	1	2	2	2	2	2	1	4	2	4	2	4	4	2	3	4	3	4	4	2	4	2	4	4	2	4	1	2	4	4	2	4	4	2	4	4	1	2	1
	788	3		1	2	2	2	1	4	2	4	1	2	4	2	1	4	2	1	4	3	2	2	4	4	2	2	2	2	1	2	1	4	2	4	4	2	2	1	2	2	2	2	2	2	4	2	1	4
	789	3		4	2	1	2	4	2	1	2	3	4	4	2	4	2	2	1	2	1	2	2	3	2	4	2	2	2	1	2	2	1	2	2	2	2	2	1	4	4	2	4	4	2	4	2	4	4
	790	3		2	4	4	4	1	1	2	4	2	3	4	2	2	1	1	3	4	4	2	2	4	2	2	2	2	3	2	4	2	4	3	4	3	2	2	4	4	2	2	4	4	2	4	2	1	3
	791	3		2	2	2	2	4	1	4	4	2	2	2	4	1	4	4	4	4	2	2	3	2	2	2	2	2	3	4	1	4	2	2	2	4	3	2	3	2	1	2	3	3	4	2	4	2	4
	792	3		2	1	2	4	4	2	2	3	2	2	2	4	2	4	4	2	2	4	2	1	2	1	4	2	2	2	2	4	1	1	2	3	2	4	2	2	4	2	3	2	4	4	4	2	2	2
	793	3		2	1	2	4	2	4	4	1	4	4	2	2	2	4	4	2	2	1	2	2	2	2	4	2	2	3	2	2	3	2	4	1	2	1	2	4	2	1	3	2	1	3	4	4	2	4
	794	3		1	2	4	1	4	4	4	3	4	4	2	2	4	3	1	2	4	2	4	3	4	2	2	2	4	2	2	4	4	2	4	4	2	2	3	2	2	3	2	2	4	1	2	2	4	2
	795	3		2	1	4	2	2	4	1	2	2	1	4	4	3	2	2	3	4	4	2	1	4	2	2	4	1	4	4	2	2	2	2	2	2	1	2	4	4	1	4	4	2	2	3	4	2	1
	796	3		4	2	1	4	2	1	2	2	3	4	4	4	3	2	2	2	2	3	3	4	2	2	4	4	1	2	4	2	4	2	4	2	4	2	2	4	2	4	2	2	4	2	2	2	1	2
	797	3		2	4	3	4	1	2	2	2	2	2	2	2	4	4	2	4	4	2	2	2	4	3	2	4	4	4	2	1	2	2	2	4	1	2	2	2	2	2	1	2	2	2	3	2	2	4
	798	3		4	4	2	4	4	1	2	1	2	4	2	2	4	1	1	4	4	4	3	1	2	4	4	2	4	2	2	4	4	3	2	4	3	2	1	4	2	3	2	4	2	4	1	2	1	4
	799	3		4	2	4	4	2	1	4	1	1	2	2	2	2	2	4	2	2	2	4	1	1	4	2	2	3	4	1	4	2	3	4	1	2	4	4	4	2	4	2	4	1	4	2	2	1	4
	800	3		2	2	1	4	1	2	4	1	4	2	1	4	3	1	4	2	4	2	4	2	4	1	2	4	1	3	4	3	1	2	3	1	2	4	2	4	3	2	4	2	2	2	2	2	4	3
	801	3		2	4	4	2	2	2	4	2	2	4	4	4	4	4	2	1	3	2	1	2	1	1	2	2	2	4	2	4	4	1	4	4	2	4	3	1	2	2	1	4	1	1	2	4	2	2
	802	3		4	3	2	3	2	4	2	2	3	3	1	2	4	2	2	2	2	1	2	2	1	1	4	4	2	2	4	3	4	1	4	2	2	4	3	1	2	2	4	2	2	4	1	2	2	2
	803	3		1	1	1	2	2	4	2	2	2	2	4	2	1	2	2	1	2	2	4	2	2	2	2	2	1	2	4	2	4	4	2	2	2	1	4	2	2	2	2	1	2	2	1	1	4	2
	804	3		1	4	2	3	2	4	2	4	2	4	1	2	2	2	4	4	4	2	4	1	4	1	4	1	1	4	4	4	4	2	4	4	4	2	4	4	2	4	2	4	2	2	2	1	2	4
	805	3		2	2	1	2	4	1	4	4	4	1	4	2	1	1	4	4	2	2	1	2	1	1	4	2	3	2	2	1	3	2	3	2	1	4	4	4	1	2	4	2	4	4	2	2	2	1
	806	3		4	4	1	4	4	4	2	2	4	4	2	4	2	2	4	2	1	2	4	2	4	4	4	4	4	4	1	2	4	2	4	2	2	4	2	2	1	2	2	2	1	1	2	1	4	2
	807	3		3	2	2	1	3	2	2	4	2	1	4	3	2	2	2	2	3	2	3	2	2	2	4	4	2	4	2	2	1	1	2	2	4	2	4	4	2	4	4	4	4	1	1	2	4	2
	808	3		1	2	4	2	2	2	2	1	4	2	1	3	4	2	4	1	2	2	2	4	4	4	2	2	1	2	2	4	4	1	4	2	4	1	2	3	4	2	4	1	3	2	4	2	2	4
	809	3		4	3	1	2	2	2	2	4	1	4	2	2	2	4	2	1	2	2	2	4	2	2	4	4	3	4	2	4	1	1	1	1	2	2	2	2	2	2	4	1	4	4	4	4	1	2
	810	3		4	2	2	2	3	2	3	4	2	1	2	4	2	1	2	2	1	2	2	4	4	2	2	2	2	2	2	1	4	2	2	2	2	4	1	2	2	2	2	2	2	2	4	2	4	4
	811	3		2	2	4	3	4	2	2	4	4	4	2	2	2	4	2	2	2	3	4	2	2	2	4	4	4	2	2	2	4	2	1	2	1	3	2	1	3	4	4	2	1	2	2	4	4	4
	812	3		2	2	2	2	2	1	2	4	4	2	1	4	1	4	4	2	4	4	4	4	3	1	4	1	1	2	2	2	4	1	4	1	3	2	4	1	4	1	1	2	2	2	4	4	2	3
	813	3		2	2	2	4	1	2	1	3	1	4	4	1	4	2	1	4	4	2	2	4	2	3	2	3	2	1	2	2	2	4	2	3	2	2	2	2	4	2	1	3	2	2	2	1	2	2
	814	3		4	1	2	1	2	2	2	1	2	2	2	2	4	3	2	4	2	1	2	2	2	1	4	2	4	2	2	4	2	2	4	2	4	2	4	4	4	2	3	2	2	2	2	4	2	2
	815	3		2	2	1	4	1	2	4	1	2	1	4	2	2	2	4	2	2	4	2	2	1	2	1	4	1	2	2	2	1	1	3	1	4	4	4	1	2	1	2	3	4	3	4	3	2	4
	816	3		2	2	4	2	2	3	1	1	4	2	1	1	2	2	4	3	2	2	2	2	4	2	4	4	3	1	4	2	1	2	2	2	2	4	2	2	4	2	2	2	4	4	2	2	1	1
	817	3		4	1	3	4	2	4	4	4	1	4	1	4	4	1	3	1	4	2	2	4	4	4	2	1	4	4	2	4	2	4	1	2	4	2	3	2	4	2	4	3	2	4	2	4	4	2
	818	3		2	1	4	2	2	4	1	2	2	3	2	2	4	2	4	2	4	2	2	4	2	1	1	4	1	2	2	2	4	2	1	2	2	2	4	2	1	4	2	3	2	4	2	4	4	2
	819	3		2	4	3	2	1	3	2	4	2	1	2	2	2	2	4	4	2	4	3	4	2	2	2	2	2	4	2	2	2	4	4	2	1	1	2	4	3	4	2	4	1	3	2	2	1	4
	820	3		4	4	3	4	2	2	2	3	3	2	4	1	2	2	2	4	1	2	2	2	2	2	4	4	4	2	1	2	4	4	2	1	3	4	1	2	1	4	4	2	2	4	2	4	2	2
	821	3		4	1	4	2	4	2	2	2	4	4	3	4	3	2	1	4	2	4	2	2	2	4	4	3	2	3	4	2	2	1	2	4	2	2	2	2	3	2	4	2	2	2	4	2	1	1
	822	3		1	1	2	2	4	2	4	2	1	1	2	2	1	4	3	2	2	4	1	4	3	4	4	2	4	4	4	4	2	1	4	4	2	4	2	2	2	2	1	2	4	2	4	2	4	4
	823	3		2	2	1	2	4	2	2	2	2	1	2	2	2	4	2	4	2	2	4	4	4	2	2	2	3	1	4	2	1	4	4	4	2	2	2	2	2	1	2	2	4	4	2	1	4	2
	824	3		3	4	4	1	4	1	4	1	2	2	4	4	2	1	2	2	2	2	2	4	4	2	3	4	4	4	4	4	2	1	2	4	2	1	4	2	2	2	4	4	2	4	2	4	2	2
	825	3		4	4	2	4	2	2	2	1	4	2	2	2	1	2	2	1	2	1	3	1	1	1	1	4	2	3	2	4	2	4	1	4	4	2	4	4	2	4	2	2	2	2	3	2	2	2
	826	3		1	1	1	4	1	2	4	2	1	2	3	1	1	4	2	2	4	2	2	1	4	2	2	4	2	2	4	4	2	1	1	2	2	2	2	4	2	2	4	4	4	1	4	4	2	2
	827	3		1	4	2	4	4	4	4	2	2	2	2	3	4	4	2	1	4	4	1	4	2	4	2	1	4	4	3	1	3	3	1	4	2	2	2	2	2	2	2	2	2	3	2	1	2	4
	828	3		2	2	4	4	4	4	4	2	2	4	2	4	4	4	2	2	1	4	2	2	4	1	2	1	1	2	2	2	4	2	3	2	4	2	4	3	4	1	4	1	4	4	3	2	4	2
	829	3		2	1	2	1	2	1	4	4	2	4	2	2	1	2	4	1	1	4	4	2	4	2	2	4	1	4	4	4	2	1	4	2	1	1	4	2	2	3	4	2	2	1	4	2	3	2
	830	3		4	4	2	4	2	2	3	4	2	4	1	4	2	1	2	2	4	1	4	1	2	2	1	1	2	2	4	1	2	2	4	4	2	4	1	1	2	2	2	4	2	2	2	4	2	2
	831	3		4	4	4	2	2	4	2	4	4	1	2	2	2	2	3	1	4	4	2	4	2	1	2	1	2	3	2	1	2	2	4	2	4	4	1	2	4	2	1	1	2	2	4	2	2	2
	832	4		1	4	4	2	2	2	1	2	4	2	4	4	2	2	4	4	4	3	2	2	2	4	1	4	2	2	3	2	4	2	2	2	4	1	4	2	4	1	1	1	4	4	1	1	2	2
	833	4		2	2	2	2	2	2	2	1	2	2	2	2	1	3	1	1	1	2	2	4	4	2	4	4	2	1	2	2	3	2	1	4	2	2	2	1	4	2	1	2	2	4	4	2	4	2
	834	4		2	2	4	4	2	2	4	1	4	1	2	3	2	4	2	2	2	3	2	3	4	2	4	2	2	3	2	4	4	2	2	1	4	1	2	4	4	3	1	1	4	2	1	2	2	1
	835	4		2	2	1	2	4	4	4	2	2	4	2	2	4	2	3	2	4	3	2	2	2	4	2	2	1	2	1	1	4	1	2	1	2	1	4	3	4	4	2	2	4	1	2	1	2	3
	836	4		4	1	4	4	4	1	2	2	2	2	2	4	2	2	4	1	2	1	2	2	4	1	4	1	2	2	2	2	2	2	4	4	4	2	3	2	2	1	4	2	2	1	1	2	4	2
	837	4		2	2	3	2	4	2	4	1	3	1	2	2	2	4	2	2	2	4	2	2	4	3	2	3	4	3	2	2	2	3	2	4	4	2	2	4	4	4	4	2	2	2	1	2	2	2
	838	4		2	2	4	2	2	4	2	4	2	2	4	2	2	2	4	1	2	4	3	4	4	2	3	2	4	4	4	1	4	2	3	2	2	3	4	1	2	1	2	2	2	1	1	2	4	2
	839	4		4	1	1	2	2	4	1	4	1	2	1	2	2	4	4	2	2	2	4	2	2	1	3	1	2	1	2	2	4	4	2	2	2	4	4	3	1	4	1	4	3	2	2	2	2	2
	840	4		4	2	4	1	2	4	2	1	1	2	2	1	3	4	2	2	2	3	2	2	4	2	4	2	4	2	1	4	2	4	2	1	2	1	2	3	4	1	4	4	3	4	1	2	1	2
	841	4		4	4	1	4	2	3	2	4	2	3	1	1	3	4	2	3	1	1	4	2	1	2	4	2	2	3	2	1	2	2	3	3	2	2	4	4	4	2	2	3	1	4	4	2	2	4
	842	4		3	2	2	2	2	2	2	1	4	3	4	2	2	2	2	2	2	2	2	1	2	2	2	4	4	2	4	2	2	2	1	4	1	1	4	2	2	2	2	2	2	1	4	2	4	2
	843	4		4	4	2	2	4	4	1	2	2	3	4	4	2	4	2	3	4	1	1	2	1	4	2	1	4	2	3	1	1	1	2	2	4	2	2	1	3	4	2	2	4	3	4	4	4	2
	844	4		2	4	1	1	2	2	4	4	4	1	1	2	3	4	4	2	2	2	4	2	2	2	2	4	2	1	1	4	2	4	4	2	2	4	2	4	4	4	2	2	4	4	4	4	1	2
	845	4		2	1	2	2	2	2	4	1	2	2	2	4	2	2	2	4	4	2	2	2	1	4	4	1	2	2	4	1	4	2	4	2	2	3	2	2	2	2	2	2	2	2	4	4	2	4
	846	4		2	2	2	2	4	4	2	4	2	4	2	2	1	2	2	4	2	4	2	2	1	4	4	2	2	4	4	2	3	2	1	4	3	4	2	4	1	4	2	2	4	2	4	3	2	4
	847	4		2	2	4	1	1	4	2	1	2	3	4	1	4	4	2	4	4	1	2	2	4	4	2	4	1	2	4	2	1	1	2	1	2	2	2	4	2	1	4	2	2	2	1	2	1	2
	848	4		2	2	2	2	2	4	4	2	3	2	4	2	4	1	2	4	1	2	1	2	2	1	2	2	4	2	1	4	2	2	2	2	4	2	4	1	4	1	2	2	2	4	4	2	3	3
	849	4		1	3	4	2	2	1	2	2	1	2	1	2	4	2	4	1	2	4	1	1	4	4	2	4	4	2	2	2	1	2	4	2	1	2	2	4	4	2	4	2	2	1	4	4	4	2
	850	4		2	4	4	3	2	1	1	1	2	4	3	2	2	2	1	1	1	4	4	1	2	4	2	1	2	1	2	4	2	1	2	2	2	2	2	4	4	2	2	1	2	2	2	2	2	2
	851	4		2	2	2	4	2	2	2	2	2	2	2	2	2	2	2	1	1	1	4	1	4	4	4	1	1	2	4	4	2	2	3	2	4	2	1	2	2	2	4	4	2	2	4	3	1	4
	852	4		4	2	4	4	2	2	4	1	2	4	4	2	2	2	2	2	1	2	4	1	2	1	4	2	1	3	2	4	2	4	2	3	2	2	2	4	2	4	4	2	2	2	2	2	2	2
	853	4		1	2	1	2	4	2	4	3	2	1	4	2	3	1	2	2	2	2	2	1	4	2	2	2	2	2	1	2	4	4	4	2	1	4	4	2	4	2	2	2	4	2	2	2	2	2
	854	4		2	4	4	2	1	2	4	4	2	2	4	2	4	2	4	4	2	1	4	2	4	1	1	4	4	3	2	4	4	2	2	2	2	4	3	2	1	2	4	2	2	3	1	2	2	2
	855	4		1	1	4	4	2	1	4	1	4	4	2	1	4	2	4	2	2	2	4	4	4	4	2	2	2	4	4	1	2	1	4	1	1	2	4	1	4	2	1	4	2	4	3	4	4	3
	856	4		2	4	4	4	4	2	2	2	2	2	4	4	2	2	1	2	4	2	4	4	4	1	2	4	2	2	1	2	4	2	3	2	2	1	1	2	4	1	4	2	2	2	2	2	2	2
	857	4		2	2	2	4	1	1	4	4	2	2	1	1	3	2	1	2	2	2	1	1	1	4	2	3	1	2	3	2	1	2	1	4	4	2	2	2	2	2	4	2	2	2	2	3	1	4
	858	4		4	3	4	4	2	2	2	2	4	2	2	4	2	2	4	1	2	1	2	2	4	2	4	2	2	4	1	4	4	2	2	2	1	2	2	2	4	2	2	2	4	2	1	4	4	4
	859	4		4	2	4	1	2	4	4	2	1	3	2	4	4	2	1	2	1	2	2	3	2	4	4	2	1	2	2	4	2	2	1	4	4	2	4	4	2	2	2	1	1	1	2	2	3	1
	860	4		2	3	2	4	1	4	2	2	2	2	1	2	1	4	2	2	1	1	1	2	4	4	2	2	4	2	1	1	4	1	2	3	2	2	2	2	4	4	2	2	4	2	2	2	4	2
	861	4		1	2	4	2	2	4	2	2	4	2	2	2	2	4	1	2	2	2	4	4	3	2	2	2	4	2	2	1	2	4	2	2	1	1	2	2	4	4	4	4	1	2	2	2	1	2
	862	4		3	2	2	2	2	2	4	1	4	1	1	2	2	2	1	2	4	4	2	4	4	1	4	2	2	1	2	1	2	2	3	2	4	4	2	4	4	4	2	3	2	2	2	4	2	4
	863	4		4	4	2	2	4	2	2	2	2	2	2	2	1	4	2	2	1	1	4	2	4	3	2	2	4	2	2	2	4	2	1	2	2	3	3	1	2	4	2	4	4	4	2	2	3	4
	864	4		2	4	1	1	4	2	2	4	4	3	2	2	2	4	1	3	3	1	2	4	4	2	4	4	2	2	1	2	4	4	2	4	4	2	3	1	2	2	1	4	2	2	2	2	3	1
	865	4		2	3	1	2	4	3	4	2	4	2	3	3	2	4	4	2	3	2	4	2	1	4	4	1	2	4	2	4	4	2	1	2	2	4	2	2	2	2	3	2	1	2	2	4	1	4
	866	4		4	2	2	2	2	2	3	3	4	4	4	1	4	2	2	4	3	4	2	1	2	4	4	1	1	2	1	3	2	1	3	4	2	2	4	2	2	2	2	4	2	2	3	2	2	4
	867	4		2	1	1	2	1	1	1	2	4	2	2	2	2	2	1	1	2	4	4	2	2	1	2	4	4	4	4	2	4	2	1	2	4	4	2	2	2	2	1	4	4	3	2	3	2	4
	868	4		2	4	4	4	4	2	4	2	2	4	4	2	3	4	2	4	4	4	4	2	2	2	2	2	2	2	1	4	4	4	2	4	2	1	4	1	2	1	4	3	2	2	4	2	1	4
	869	4		2	2	2	2	2	2	4	4	4	2	4	2	2	1	4	1	2	4	1	2	2	4	3	1	4	4	2	2	4	2	4	2	2	4	2	2	2	2	2	2	4	4	4	2	1	2
	870	4		2	4	2	1	2	4	2	3	3	2	2	1	2	2	2	4	2	4	4	2	2	2	2	1	4	4	1	2	2	2	2	1	4	1	4	4	3	3	1	1	2	2	4	1	1	2
	871	4		1	4	2	1	4	2	2	3	2	3	2	2	2	2	1	2	2	4	2	2	4	4	4	4	4	1	2	2	2	2	2	2	2	4	1	2	1	2	1	2	2	1	2	3	2	3
	872	4		4	2	4	4	2	2	2	1	1	4	4	3	1	1	4	4	2	4	1	2	2	4	2	4	1	2	2	4	2	4	4	2	4	1	2	3	2	1	4	2	4	2	1	2	2	4
	873	4		3	4	4	2	2	2	4	2	4	2	2	2	4	2	4	2	4	4	3	1	2	2	2	2	4	2	1	2	4	2	4	1	2	4	2	1	4	2	2	2	2	4	3	4	2	2
	874	4		1	2	2	3	4	1	4	2	4	4	2	2	2	1	2	2	2	4	2	2	2	4	3	4	2	4	2	4	2	2	4	4	4	4	2	2	2	1	2	2	3	1	4	2	4	2
	875	4		4	2	2	2	3	2	2	2	1	1	4	1	2	3	4	2	2	4	2	2	1	3	2	2	1	2	4	2	2	4	2	4	2	2	2	4	2	2	4	2	2	2	1	2	2	2
	876	4		2	1	2	4	2	2	2	2	2	2	4	1	2	2	4	4	1	1	4	4	2	2	2	1	2	3	4	2	2	4	2	4	4	2	2	2	2	4	4	4	2	2	2	2	3	2
	877	4		2	2	4	2	2	4	1	2	2	2	1	1	1	2	2	2	3	4	2	1	2	3	2	2	2	2	4	4	4	4	2	2	4	2	1	2	1	2	4	2	1	2	2	2	1	2
	878	4		4	4	4	2	2	4	2	1	4	2	2	4	2	2	4	1	2	3	1	4	2	2	1	2	2	3	2	4	2	4	3	2	4	4	4	2	2	1	1	2	4	2	4	1	2	4
	879	4		4	2	1	3	2	2	2	1	3	2	4	1	4	1	4	4	1	4	4	2	2	4	2	4	2	2	2	4	1	2	2	2	4	2	2	4	4	4	4	1	3	3	2	4	4	4
	880	4		1	4	2	4	1	4	3	4	3	4	2	3	1	2	4	2	4	4	4	1	4	4	1	4	2	1	2	2	2	4	2	2	2	2	2	4	2	4	2	1	4	4	2	2	2	4
	881	4		2	4	2	4	2	2	1	2	4	2	4	2	2	1	2	2	2	4	4	4	4	1	4	4	3	4	2	2	4	1	2	2	2	4	2	2	2	2	2	2	2	4	4	2	2	2
	882	4		2	2	2	4	1	2	4	4	4	1	2	4	1	4	1	2	4	2	2	4	4	2	2	2	4	1	1	2	1	4	4	2	4	2	4	2	2	4	4	1	2	2	2	1	2	1
	883	4		1	1	4	2	2	2	3	2	4	2	2	2	4	1	2	2	4	1	2	4	2	2	2	2	4	3	2	4	3	2	4	4	4	2	2	4	4	2	3	2	2	1	4	2	2	4
	884	4		2	2	4	2	2	4	2	4	2	2	2	4	1	2	2	3	2	2	2	3	2	2	4	4	2	2	4	4	2	4	4	2	4	2	2	4	2	4	2	2	2	2	2	1	4	4
	885	4		1	1	2	3	2	4	2	3	2	2	2	2	2	4	1	2	2	1	2	2	2	4	4	1	2	4	2	2	2	2	4	2	4	3	2	4	2	2	2	2	1	2	2	1	4	2
	886	4		3	1	2	4	2	4	2	4	2	2	2	2	4	1	2	4	4	1	2	4	2	4	1	3	4	2	1	2	4	4	2	4	4	2	2	4	2	4	2	2	4	4	4	1	2	2
	887	4		4	1	2	4	2	1	4	1	3	1	4	2	2	1	2	1	4	2	3	2	1	4	2	4	2	4	2	4	1	4	2	4	4	2	2	2	3	1	1	2	4	2	2	4	1	2
	888	4		3	1	4	4	2	2	2	2	4	3	1	1	1	4	2	2	2	2	2	2	1	2	4	2	2	4	4	2	1	2	4	4	2	2	4	2	4	2	2	2	4	2	2	2	4	4
	889	4		2	1	2	2	2	2	2	4	4	1	2	2	2	2	2	1	2	2	2	4	2	1	2	2	2	2	1	2	4	2	4	2	2	4	2	2	4	4	3	4	2	2	1	2	4	4
	890	4		4	4	1	4	2	4	2	4	1	2	1	4	2	4	4	4	4	2	2	4	2	1	4	1	2	3	2	4	2	4	2	2	2	1	4	2	1	4	1	4	2	2	3	4	2	2
	891	4		4	2	1	2	2	2	1	4	2	2	4	4	2	3	2	2	2	2	4	1	1	2	2	4	1	4	2	2	2	2	2	1	2	2	2	2	3	2	2	2	1	2	4	2	4	2
	892	4		4	4	4	2	4	2	4	3	4	2	2	2	4	2	3	2	2	2	2	4	3	4	2	2	2	1	1	4	2	2	4	4	4	1	2	1	2	4	1	2	2	2	2	1	4	4
	893	4		3	4	2	2	4	4	2	2	2	2	2	4	2	1	4	2	2	2	1	4	1	2	4	1	4	2	4	2	4	2	3	2	2	2	4	2	2	1	4	2	2	2	2	2	2	4
	894	4		4	3	2	3	1	2	1	2	4	2	2	4	4	2	4	2	2	4	4	2	1	4	4	4	1	3	1	2	2	2	4	4	2	1	2	1	2	2	1	2	2	4	4	2	3	4
	895	4		2	2	4	2	2	2	3	2	2	4	2	4	2	2	2	4	4	2	2	2	2	1	2	2	2	1	2	1	4	3	1	4	4	4	1	2	2	4	4	2	1	2	1	2	2	4
	896	4		2	1	2	4	4	4	4	1	4	2	4	4	1	2	2	4	2	1	2	2	2	4	2	2	2	4	2	2	4	4	4	4	2	2	4	1	4	2	4	4	4	4	4	3	2	2
	897	4		4	4	4	2	2	1	4	2	4	2	1	3	3	4	4	2	2	4	4	2	3	4	1	3	4	3	4	2	4	2	1	1	4	4	2	2	4	4	2	2	2	4	4	1	3	4
	898	4		2	1	4	4	4	2	4	4	2	2	4	2	3	4	4	4	2	4	2	2	2	2	2	2	2	1	1	4	2	2	4	4	2	4	1	2	2	2	2	2	4	2	4	2	3	2
	899	4		4	2	4	4	2	4	2	1	2	2	4	2	3	2	2	4	4	2	4	4	2	4	2	3	1	2	4	2	2	4	2	4	2	1	2	2	4	3	2	2	4	2	2	4	2	2
	900	4		1	2	4	2	3	3	2	2	2	3	2	2	3	2	2	2	2	1	4	3	2	1	4	2	1	2	2	1	4	2	1	4	4	3	2	4	1	2	2	2	4	2	1	4	2	4
	901	4		4	2	2	2	2	1	2	4	2	2	2	2	1	4	2	4	2	1	2	4	1	4	4	2	2	2	3	2	3	2	2	4	2	3	4	2	3	4	1	2	4	4	4	2	2	1
	902	4		2	3	1	2	2	3	3	4	4	4	2	4	2	2	2	2	4	1	2	2	2	4	2	2	2	4	1	4	1	3	2	4	2	2	2	1	2	4	2	2	3	2	2	2	2	4
	903	4		2	1	2	2	1	2	2	2	1	2	4	3	2	2	2	4	4	2	4	2	2	2	2	4	2	4	1	2	4	2	2	2	2	2	4	2	1	2	2	1	2	4	1	2	2	4
	904	4		1	1	4	4	2	4	2	2	1	1	1	4	4	2	4	2	4	4	2	4	4	2	2	4	1	1	1	1	2	4	2	1	2	4	2	4	2	2	1	4	2	4	2	2	1	2
	905	4		2	2	1	4	2	2	3	4	2	2	2	1	4	2	2	2	2	2	2	2	4	4	2	2	2	1	3	4	3	2	2	2	1	1	2	2	4	2	1	4	1	1	3	2	1	4
	906	4		2	4	2	4	1	4	2	2	2	1	2	3	2	4	1	4	1	1	2	1	1	4	2	1	2	4	4	2	2	4	2	2	2	2	1	3	4	2	2	2	4	2	2	1	1	4
	907	4		2	2	2	1	4	4	4	4	1	4	1	4	2	2	1	3	1	3	2	2	4	2	4	4	3	2	3	2	2	2	4	2	3	4	2	3	4	2	2	2	4	4	2	3	4	2
	908	4		2	2	2	2	1	2	2	2	4	3	2	4	4	2	2	1	4	2	2	2	2	2	1	4	3	2	1	2	2	4	4	2	2	2	2	4	2	2	4	2	2	2	2	1	2	2
	909	4		1	1	2	4	2	2	2	1	4	2	2	1	4	1	2	2	2	1	2	2	2	4	2	3	1	4	4	2	2	1	2	1	3	4	2	3	1	2	4	4	2	2	4	2	4	1
	910	4		4	2	2	2	1	2	1	4	2	4	4	2	3	4	2	2	4	3	4	2	4	3	2	1	2	1	3	2	1	4	2	1	2	2	4	4	4	2	4	2	2	2	4	4	4	2
	911	4		1	2	2	2	4	4	2	2	1	2	3	2	3	4	1	4	2	1	2	2	4	4	2	2	2	4	2	2	4	3	3	2	3	2	4	4	1	2	4	1	4	2	2	2	4	2
	912	4		1	2	3	2	2	4	1	4	2	2	4	2	4	3	4	4	2	2	2	4	4	2	1	4	2	1	4	2	4	1	2	2	2	2	3	3	1	3	2	3	4	3	2	2	2	1
	913	4		4	4	1	1	1	2	4	4	3	2	4	1	4	2	4	2	4	2	2	2	2	4	1	4	4	4	4	1	2	2	4	4	2	2	2	2	2	2	4	2	2	2	2	3	2	1
	914	4		2	2	2	2	4	1	4	1	3	2	4	2	2	2	2	4	4	4	4	1	4	4	2	2	2	3	1	4	1	1	4	4	2	2	4	4	2	3	1	1	2	3	1	1	2	2
	915	4		2	2	2	2	2	2	1	2	4	4	2	2	2	4	3	2	3	2	2	4	2	2	4	4	3	4	2	4	2	2	2	4	2	2	4	4	2	2	4	2	2	2	1	3	4	3
	916	4		1	1	2	4	1	4	2	2	2	1	2	2	2	2	2	3	4	4	2	2	2	4	2	2	2	2	4	2	2	2	2	4	2	4	3	2	2	3	2	2	4	2	3	2	2	3
	917	4		1	4	3	2	2	2	2	1	2	2	2	2	2	4	4	4	2	2	1	4	4	2	4	1	4	4	3	1	2	4	2	4	4	1	2	2	1	1	2	1	4	2	3	4	2	2
	918	4		4	4	1	4	4	4	1	2	1	2	2	2	1	4	4	2	2	2	2	2	4	3	2	4	2	1	2	2	4	1	2	2	2	2	3	1	4	1	1	4	2	3	2	2	4	4
	919	4		1	2	4	4	1	1	1	4	3	2	2	2	2	1	4	2	2	1	3	1	4	2	2	2	1	1	4	2	1	2	2	1	3	3	2	2	4	2	1	2	2	2	4	1	2	2
	920	4		2	4	4	1	2	2	2	2	3	4	2	1	2	2	2	3	2	2	2	4	4	4	3	2	2	2	2	2	3	4	4	1	4	1	2	4	2	2	4	2	2	2	3	2	2	1
	921	4		4	3	2	2	1	2	3	2	4	2	2	4	2	1	2	2	4	2	3	1	2	2	2	2	1	2	2	2	4	4	4	4	2	2	2	2	2	2	4	1	1	1	2	4	4	2
	922	4		2	4	2	1	4	2	1	2	4	4	2	2	2	4	4	4	2	2	2	2	2	1	1	1	1	4	4	2	1	4	2	1	4	4	2	2	4	4	2	1	1	1	2	1	1	4
	923	4		2	1	4	2	4	4	2	2	4	1	2	4	4	2	2	2	4	1	2	1	1	4	2	3	2	1	3	2	1	2	2	2	2	1	2	2	4	1	4	2	4	4	2	1	4	2
	924	4		2	3	4	4	4	4	2	4	2	2	2	2	3	3	1	2	2	2	2	2	2	2	2	1	2	2	2	1	4	2	4	2	2	4	1	1	2	3	2	4	1	4	2	4	2	2
	925	4		1	2	2	2	1	4	2	2	3	2	1	4	2	1	2	2	4	2	1	2	4	2	1	2	2	4	2	4	4	4	2	4	2	2	4	4	3	2	2	2	4	2	1	1	2	2
	926	4		1	2	2	4	1	1	4	4	4	2	1	2	2	2	2	2	2	2	2	2	4	4	1	4	3	2	4	4	1	2	2	1	2	4	3	4	2	4	3	2	4	2	2	2	2	3
	927	4		4	4	3	4	1	2	2	2	1	2	2	2	2	4	1	1	2	2	2	1	3	4	2	2	2	3	4	2	2	4	2	4	1	2	2	3	4	2	2	4	2	2	3	4	2	2
	928	4		2	4	2	4	2	2	2	2	1	4	1	3	4	2	2	2	3	2	2	2	1	1	2	4	4	4	2	4	2	4	2	4	1	2	2	4	2	3	4	4	4	2	4	4	4	2
	929	4		1	1	2	2	2	4	2	4	1	2	4	1	2	2	2	2	2	1	2	4	2	4	1	2	1	2	2	2	4	4	4	1	4	4	1	4	4	2	4	3	2	2	4	4	2	1
	930	4		1	2	4	2	4	1	4	2	2	2	2	2	2	3	2	1	2	4	2	4	2	2	2	3	2	2	1	4	1	2	2	2	2	2	4	4	1	4	2	2	2	2	1	2	4	1
	931	4		4	2	2	2	4	4	4	4	1	2	2	2	1	2	1	2	2	2	2	2	4	4	1	4	2	4	4	2	4	4	2	2	2	4	3	2	2	2	1	4	2	2	1	3	2	4
	932	4		3	2	2	2	2	1	2	1	2	2	2	2	1	2	3	1	4	4	4	4	2	4	2	4	2	2	4	2	4	2	2	2	2	2	1	2	4	3	2	4	1	1	3	4	2	4
	933	4		2	4	2	1	2	4	4	4	2	2	2	2	4	2	4	2	3	2	2	1	4	1	2	2	2	1	2	2	1	2	2	4	3	4	2	2	4	2	2	1	2	1	1	4	2	4
	934	4		2	2	2	2	1	2	4	2	4	4	2	3	2	2	2	1	1	2	2	2	2	2	2	2	4	4	2	2	4	1	1	1	2	2	4	4	3	2	2	4	3	1	2	4	2	2
	935	4		4	1	2	2	4	4	2	4	3	2	2	4	2	2	2	2	4	3	4	2	4	1	2	1	2	4	2	2	3	2	1	3	4	2	2	2	2	2	2	4	4	1	2	4	3	2
	936	4		2	4	1	1	1	3	4	4	2	2	2	4	3	2	2	2	2	3	4	4	2	4	2	1	4	4	4	3	2	4	1	4	2	3	1	1	1	1	2	2	2	2	2	2	2	2
	937	4		4	4	1	2	3	1	2	1	2	2	1	2	4	4	2	2	3	2	2	1	2	4	2	4	2	4	4	1	2	1	1	2	3	4	2	2	4	2	1	4	4	2	2	2	4	2
	938	4		2	4	4	2	2	2	1	4	2	1	4	2	2	2	4	4	2	1	1	3	2	2	2	2	2	2	2	2	2	1	2	1	2	3	2	4	4	2	1	2	2	2	2	4	4	3
	939	4		2	1	2	1	1	4	2	4	2	4	4	2	2	1	2	2	4	4	2	2	4	1	1	1	4	2	4	3	4	1	2	4	1	2	2	3	1	4	2	2	4	4	3	2	2	2
	940	4		2	2	2	4	3	4	4	2	4	4	4	4	2	2	4	4	2	1	2	1	4	4	2	1	4	1	4	4	2	2	1	4	2	2	2	2	1	4	2	1	2	4	1	4	2	1
	941	4		2	1	4	4	4	4	4	4	3	2	1	2	2	2	1	2	4	2	2	4	2	2	2	2	2	2	4	3	4	2	2	2	2	4	4	2	4	2	2	4	2	2	4	4	4	3
	942	4		1	2	2	2	2	4	4	4	2	1	4	2	4	2	4	2	2	2	1	2	2	1	2	2	2	1	4	2	3	4	2	4	2	2	4	2	2	4	1	2	4	4	4	4	4	2
	943	4		2	1	1	4	2	4	2	4	4	2	4	2	2	4	2	2	4	2	2	2	4	2	3	2	2	3	2	1	4	1	3	4	1	4	3	2	4	1	4	2	4	4	4	2	2	2
	944	4		1	4	4	1	4	2	4	2	4	4	4	2	2	2	3	1	2	2	2	2	2	4	4	2	2	4	2	3	2	4	2	2	2	1	2	4	2	2	3	4	2	1	2	2	3	2
	945	4		2	3	4	2	1	3	1	4	1	2	2	4	2	2	2	2	2	2	4	2	2	3	2	2	3	1	2	2	1	4	2	3	2	2	1	2	4	2	2	2	2	1	2	1	4	4
	946	4		2	1	2	4	4	2	2	2	4	1	2	2	1	2	2	1	2	1	2	2	2	4	2	1	2	2	3	2	1	2	2	2	2	3	2	2	4	2	4	2	2	2	4	2	1	4
	947	4		3	3	4	2	3	3	4	2	4	1	4	1	4	1	1	2	2	2	3	2	2	2	2	2	4	1	4	2	2	4	2	4	4	1	4	2	1	4	3	2	2	2	4	1	3	3
	948	4		1	1	1	2	2	2	2	2	2	4	1	2	1	1	4	1	2	2	1	2	1	2	2	3	4	2	1	4	2	2	2	4	2	4	2	2	2	1	2	2	2	2	2	2	2	2
	949	4		2	2	4	4	4	4	2	2	2	4	4	4	1	4	2	2	2	2	1	4	2	4	4	4	2	2	2	4	2	2	2	4	4	2	4	2	2	2	2	4	1	2	2	1	2	2
	950	4		1	2	4	3	2	4	3	2	2	2	4	4	2	2	4	2	4	2	2	2	2	1	2	3	1	2	2	2	4	4	1	3	3	2	2	2	2	2	2	4	2	1	2	2	2	2
	951	4		4	2	1	2	4	2	2	1	4	3	2	2	2	2	4	2	4	2	2	2	2	4	2	2	4	4	4	2	4	4	2	2	3	4	1	2	2	2	4	2	2	4	2	2	1	1
	952	4		4	4	4	4	2	4	3	3	4	2	4	2	4	2	2	2	4	1	2	2	1	4	4	4	2	4	4	2	2	4	1	3	2	3	2	2	3	4	3	4	2	2	4	2	2	2
	953	4		4	1	2	4	2	4	2	2	1	4	4	3	2	2	4	2	4	2	4	4	3	4	2	3	1	2	4	4	1	2	3	4	1	4	2	3	2	1	2	1	2	4	2	4	2	4
	954	4		2	4	2	2	2	4	4	4	4	1	2	4	2	1	2	2	4	1	3	3	2	1	1	2	2	4	2	4	1	1	4	3	4	2	2	4	2	2	4	2	2	4	1	2	4	2
	955	4		4	2	4	2	2	1	4	4	2	1	2	2	2	2	2	2	4	3	4	2	2	2	4	2	4	3	2	2	2	4	2	1	2	2	1	4	4	2	2	4	3	2	2	1	4	3
	956	4		2	2	4	2	2	2	1	1	2	3	4	2	4	4	2	2	2	4	2	2	2	4	2	4	2	4	4	2	2	1	2	4	4	4	2	4	2	2	2	1	4	2	2	2	2	2
	957	4		1	4	2	4	2	2	4	3	2	4	2	2	4	1	1	1	1	2	2	2	4	1	2	2	4	1	4	1	2	4	2	2	4	2	2	2	4	4	2	1	4	4	3	4	2	4
	958	4		1	2	2	2	2	4	2	1	3	1	3	4	2	4	2	2	2	2	2	2	1	2	4	2	4	2	4	2	4	2	2	4	4	2	4	1	2	4	2	2	2	4	4	2	4	1
	959	4		1	4	4	1	1	1	4	4	4	2	2	2	1	4	2	2	2	4	2	1	4	2	2	4	2	2	2	2	2	2	4	2	4	2	2	2	2	2	4	2	2	4	4	4	2	2
	960	4		3	1	1	2	1	2	2	2	4	2	4	2	1	2	2	1	2	4	1	1	1	2	1	2	2	2	4	4	2	4	2	4	2	3	3	1	2	2	2	2	4	4	4	4	4	2
	961	4		1	4	2	4	4	2	1	4	2	2	2	4	2	2	2	2	4	2	1	1	4	1	4	2	4	2	2	2	4	4	2	2	4	2	4	2	2	2	4	1	2	4	2	4	2	2
	962	4		1	4	2	4	2	1	3	1	4	4	2	4	2	2	2	4	4	4	1	2	4	2	1	4	4	4	2	2	2	2	4	4	2	2	2	4	2	4	1	2	4	4	1	2	2	2
	963	4		4	2	4	1	4	2	1	1	4	3	1	2	4	2	2	1	2	2	2	2	2	2	4	4	2	4	4	4	4	4	2	3	1	4	2	1	3	2	4	3	4	2	4	2	2	4
	964	4		1	4	4	2	4	4	2	4	2	1	2	4	2	2	4	2	2	3	2	2	4	2	1	4	4	2	2	1	2	3	4	4	4	2	1	2	2	2	2	1	1	2	4	2	4	4
	965	4		2	2	2	2	4	3	1	1	2	2	2	3	3	2	1	1	2	4	4	2	4	2	2	1	2	1	1	1	2	2	1	1	2	1	4	4	2	4	2	4	2	4	1	2	4	2
	966	4		2	4	2	2	2	2	2	2	1	2	2	4	4	2	2	2	2	2	2	2	4	2	3	2	2	4	2	4	2	2	2	1	4	2	2	2	3	2	4	4	2	2	1	1	4	4
	967	4		3	4	1	2	1	4	2	4	2	4	2	4	2	1	2	1	3	4	4	2	2	2	4	3	2	2	2	2	2	1	4	4	1	2	2	4	1	2	2	4	2	1	2	2	2	2
	968	4		3	4	4	2	2	1	2	4	4	2	1	2	1	1	2	1	2	4	4	1	1	4	1	4	2	4	4	3	2	2	2	4	2	1	2	4	2	2	3	2	4	4	2	4	4	2
	969	4		2	1	4	2	2	3	2	2	2	2	4	2	4	2	4	2	4	2	2	2	4	4	4	4	2	2	2	2	2	2	4	4	4	4	2	2	2	1	2	2	2	2	2	4	2	4
	970	4		2	2	4	2	2	4	1	4	2	1	4	2	1	3	2	2	1	2	2	2	4	4	1	2	2	4	4	4	2	4	4	2	2	1	2	3	4	4	2	2	1	4	2	1	2	1
	971	4		4	3	4	1	4	2	2	4	3	1	3	4	1	2	2	4	1	1	2	4	2	2	2	2	4	2	2	2	2	2	4	2	2	4	1	2	4	4	2	4	4	4	2	3	4	1
	972	4		2	2	2	2	2	2	4	1	4	2	2	2	1	4	4	4	4	1	3	2	4	2	4	2	2	4	1	4	2	2	1	1	2	4	2	4	1	2	2	2	2	2	2	2	4	1
	973	4		2	2	4	2	2	4	4	1	2	4	4	2	3	2	2	2	1	3	4	4	2	2	2	2	4	4	3	4	1	1	4	4	4	2	3	2	2	2	1	3	2	3	2	4	2	2
	974	4		4	4	4	1	2	2	2	4	2	2	4	2	4	2	2	4	1	1	2	1	2	2	4	4	4	4	2	3	4	2	2	2	1	2	2	4	2	4	2	1	2	4	2	4	2	4
	975	4		1	2	4	2	2	2	2	3	1	3	2	2	1	4	4	1	4	2	2	2	4	4	4	2	3	4	4	1	1	1	2	1	4	2	4	2	2	2	2	1	2	1	4	4	2	2
	976	4		2	2	2	1	2	4	4	4	1	1	2	4	1	2	2	2	2	2	4	1	2	2	2	4	4	1	2	1	2	3	2	2	2	2	2	1	4	1	1	2	2	3	1	2	4	3
	977	4		2	2	2	1	4	2	2	3	2	4	1	2	2	2	2	2	2	4	2	2	4	4	2	2	4	4	2	4	2	2	1	4	4	1	2	4	2	2	4	4	2	4	1	2	2	4
	978	4		4	4	4	1	4	2	2	2	2	1	2	2	4	1	2	4	2	1	4	2	2	1	2	2	1	4	2	2	1	4	3	3	2	4	4	4	2	2	2	2	2	2	2	4	2	4
	979	4		4	4	4	3	2	2	4	3	2	2	3	3	3	4	2	3	4	2	2	2	4	2	2	2	2	2	4	4	4	2	2	2	4	1	4	2	2	1	4	3	4	4	1	4	4	2
	980	4		2	2	2	4	4	4	2	4	4	1	2	1	3	4	4	3	1	1	2	2	4	3	4	4	2	1	2	3	4	1	4	4	3	2	2	1	4	4	4	2	4	4	2	4	3	4
	981	4		2	2	4	4	4	1	4	2	2	4	4	1	3	1	2	4	2	4	4	2	2	1	2	2	2	2	2	1	4	2	2	2	1	2	2	4	4	4	1	2	3	2	2	2	4	2
	982	4		2	2	1	1	2	1	2	1	2	2	4	1	1	2	2	2	2	2	2	1	4	3	4	4	1	4	2	2	2	2	4	2	2	2	4	4	2	2	1	1	2	2	4	2	4	4
	983	4		2	2	2	1	3	2	4	2	4	4	4	2	1	4	2	4	1	1	4	4	1	1	2	3	4	2	2	4	4	2	1	2	2	1	4	4	2	2	2	2	4	2	4	2	2	2
	984	4		4	2	3	4	4	2	2	1	2	2	4	2	2	2	4	2	4	2	2	4	1	2	3	2	2	4	1	2	2	2	3	2	1	4	2	2	2	4	2	4	2	1	2	4	1	2
	985	4		2	2	4	2	2	1	4	4	1	4	2	4	1	2	2	4	2	4	4	2	2	4	1	4	4	2	2	1	2	4	4	4	2	2	4	4	2	4	2	4	2	2	2	2	1	4
	986	4		4	4	2	1	4	2	1	2	2	2	4	2	1	4	2	2	1	1	4	4	3	2	4	2	2	2	4	4	4	2	2	2	2	2	1	2	4	4	4	4	4	1	4	4	1	2
	987	4		4	2	1	2	2	2	2	2	2	2	2	2	2	4	4	2	4	2	1	4	2	3	1	2	4	4	2	4	4	3	2	1	1	4	2	2	2	3	2	3	2	2	2	4	4	2
	988	4		2	3	4	3	2	3	2	1	3	3	2	2	3	2	4	4	4	4	2	4	2	2	1	3	4	2	1	2	2	2	1	2	4	2	2	1	1	2	4	4	2	4	2	2	2	2
	989	4		2	4	2	2	2	1	1	2	2	2	1	4	2	2	3	4	1	1	4	1	4	1	4	4	1	4	4	4	4	1	2	4	2	4	2	4	1	1	4	2	2	2	3	2	4	4
	990	4		4	3	2	2	2	4	1	2	3	3	4	4	2	2	4	2	2	2	4	2	2	2	4	4	1	2	2	2	1	4	2	2	4	4	2	1	4	1	2	4	1	4	3	4	2	4
	991	4		1	2	3	1	1	1	4	2	2	2	2	4	2	2	4	4	1	3	2	2	2	2	4	3	2	1	2	4	4	1	2	2	2	4	4	3	4	2	4	2	1	4	2	4	1	2
	992	4		2	2	4	4	2	2	2	4	2	1	4	2	4	3	2	4	4	4	3	4	4	4	4	2	1	1	3	4	2	2	4	1	2	1	4	2	4	2	1	4	3	4	2	2	2	3
	993	4		2	2	3	4	2	4	1	4	2	2	2	4	3	1	2	1	2	4	2	2	1	2	2	1	1	2	1	2	2	2	1	2	3	1	4	2	4	4	2	2	4	3	2	1	2	2
	994	4		4	2	4	2	4	2	3	4	4	3	4	2	1	4	2	4	4	4	1	4	2	4	4	1	2	4	3	4	4	4	4	1	4	2	1	1	2	2	2	4	2	1	2	2	4	2
	995	4		2	2	4	1	2	4	2	2	2	4	2	4	2	4	2	2	2	3	4	3	4	2	2	4	2	1	2	4	1	4	1	2	1	2	1	1	1	4	1	1	2	4	2	2	2	4
	996	4		2	1	2	2	2	3	4	2	2	2	4	1	2	2	2	4	1	3	2	4	1	2	2	4	2	2	2	2	4	2	2	2	1	4	4	1	2	4	3	1	3	2	2	4	1	1
	997	4		2	2	2	2	4	2	4	2	1	2	2	4	4	2	1	4	2	2	2	2	4	3	2	2	2	2	2	1	2	4	2	2	2	2	1	2	2	4	4	2	4	4	2	2	1	4
	998	4		2	1	4	2	1	1	1	4	4	2	4	4	4	4	1	2	4	4	2	2	2	3	2	4	3	2	1	1	2	2	2	3	4	4	4	2	2	2	2	4	2	2	2	2	2	2
	999	4		2	3	2	1	4	2	4	2	4	1	2	4	2	3	2	2	1	2	2	2	2	2	4	2	2	2	4	3	4	1	2	2	4	2	3	4	2	2	4	4	4	2	2	3	4	2
	1000	4		4	2	4	2	4	2	1	4	2	2	1	3	1	2	2	2	2	2	2	4	2	2	3	1	2	2	2	2	2	3	2	4	2	4	2	4	1	2	1	2	2	2	2	2	4	1
	1001	4		3	1	2	4	1	2	2	3	2	2	2	1	1	2	4	3	2	1	2	3	2	2	4	2	2	2	1	2	1	1	2	4	4	2	2	2	1	4	2	2	2	1	2	2	2	4
	1002	4		2	2	2	2	2	1	2	4	2	1	1	1	2	2	2	2	2	2	2	2	4	4	2	2	4	4	4	1	1	4	2	2	4	2	2	2	2	2	1	4	4	2	4	4	4	4
	1003	4		2	4	2	2	2	4	4	2	2	4	2	4	2	4	2	2	2	2	2	3	2	2	4	2	1	4	1	2	4	4	1	2	4	2	2	2	2	1	2	1	2	2	2	4	4	2
	1004	4		4	4	4	4	2	2	2	4	4	2	4	1	4	4	3	2	2	2	3	2	2	4	1	2	2	2	4	2	3	4	4	2	2	4	3	4	4	4	2	4	2	2	2	4	4	3
	1005	4		4	2	2	4	4	4	1	2	1	2	1	2	4	2	2	2	1	4	2	3	4	2	2	2	4	2	2	4	3	3	1	2	1	4	2	2	2	2	1	2	2	2	3	4	2	1
	1006	4		3	1	3	2	1	2	2	4	4	2	4	1	2	1	1	3	3	2	2	4	4	2	2	4	2	3	2	2	2	2	2	1	4	2	2	2	4	3	4	2	2	4	4	4	2	2
	1007	4		4	2	4	4	1	4	4	2	2	1	2	2	4	2	2	2	1	2	4	2	2	2	2	2	2	4	1	2	4	4	2	2	2	2	4	2	4	2	4	3	4	2	4	2	2	4
	1008	4		2	2	1	2	4	1	2	1	3	4	4	2	2	2	2	2	3	4	4	4	4	1	2	1	4	4	3	2	1	4	3	2	4	4	2	3	2	2	2	4	1	4	2	3	1	2
	1009	4		4	2	4	4	4	2	4	2	1	3	1	4	3	2	2	4	4	1	2	3	4	3	3	2	2	2	2	2	2	2	2	4	2	4	2	2	2	2	2	2	2	4	2	2	1	4
	1010	4		1	2	2	3	4	3	2	2	2	2	3	3	1	2	2	2	4	2	3	2	2	2	4	2	3	1	4	4	4	1	4	2	3	2	2	1	2	2	4	2	2	1	2	2	2	2
	1011	4		2	4	4	1	2	1	2	3	4	4	1	1	1	2	2	4	4	4	4	3	1	4	1	3	2	2	2	1	2	2	4	2	4	2	4	2	2	4	1	2	4	4	2	4	2	4
	1012	4		2	2	2	4	4	1	1	4	4	4	1	4	2	2	4	3	2	2	1	1	2	1	2	4	1	2	2	4	2	2	2	4	1	4	1	1	4	2	2	3	2	2	3	2	4	4
	1013	4		4	4	2	2	3	4	2	1	2	2	2	3	4	2	2	4	2	3	4	4	1	4	2	2	4	2	4	4	4	4	4	2	4	4	1	4	2	4	4	4	2	4	2	3	4	2
	1014	4		2	1	4	1	2	4	1	4	3	2	4	2	2	4	4	2	2	2	4	4	3	2	3	4	3	1	2	2	2	2	2	4	3	1	3	2	4	4	1	2	1	4	2	2	2	2
	1015	4		2	2	2	4	4	2	1	1	2	1	1	2	4	3	2	4	1	1	2	2	2	4	2	2	1	1	4	4	1	4	4	4	2	2	1	4	1	2	1	2	4	2	1	1	2	4
	1016	4		2	1	2	2	4	4	4	1	4	4	2	2	1	4	2	4	1	2	4	1	4	4	2	2	4	2	2	3	4	4	2	2	2	1	2	1	4	4	4	2	2	1	2	2	4	2
	1017	4		3	2	1	3	2	2	3	2	1	1	1	2	1	2	2	2	2	2	3	2	4	2	2	1	4	4	4	4	2	2	2	2	2	2	2	4	4	2	2	2	2	2	2	4	3	3
	1018	4		4	4	2	4	4	4	2	4	4	2	2	2	2	2	4	2	4	4	4	2	3	3	2	3	4	4	2	3	4	4	4	2	4	2	2	1	2	2	2	2	2	2	2	2	1	2
	1019	4		3	3	2	2	2	2	4	3	1	1	4	2	2	4	1	3	4	4	4	4	4	4	2	2	1	2	1	4	4	4	2	2	2	4	2	2	2	2	4	2	2	2	2	2	1	2
	1020	4		3	1	2	4	2	1	2	2	2	4	3	1	1	1	4	4	2	1	1	2	4	2	3	2	2	4	2	3	2	2	4	2	4	4	2	4	4	2	2	3	2	1	4	2	4	4
	1021	4		3	1	4	4	4	4	4	1	1	2	2	2	4	4	2	2	2	1	2	4	4	2	4	2	2	2	2	2	2	4	4	4	4	2	4	2	2	4	4	2	2	2	4	3	2	4
	1022	4		2	2	4	4	4	2	1	2	3	4	4	2	1	2	2	2	2	4	4	3	2	1	4	2	1	1	4	2	4	4	2	4	2	4	2	1	2	3	2	2	4	4	3	1	2	1
	1023	4		2	4	4	3	4	4	2	4	2	2	4	2	3	2	4	4	2	4	4	2	2	1	1	2	2	3	2	2	4	2	2	4	4	2	2	3	2	2	1	2	2	4	4	4	2	2
	1024	4		2	1	3	4	2	2	2	2	4	2	4	2	4	2	2	2	2	4	2	2	2	2	2	1	1	2	1	4	2	4	1	3	4	4	4	4	1	4	4	1	4	2	4	1	4	2
	1025	4		1	1	2	2	4	4	3	1	2	4	4	4	4	1	2	4	4	2	3	4	4	2	2	1	2	2	4	1	2	2	1	1	1	4	2	2	2	2	4	4	1	2	4	4	2	2
	1026	4		1	4	4	2	1	2	2	2	4	2	2	4	2	1	2	2	2	2	2	2	1	2	4	2	1	2	2	4	2	4	2	2	2	4	2	4	4	2	2	2	2	2	4	4	1	2
	1027	4		2	1	1	4	2	4	4	2	4	2	2	2	2	4	4	1	2	4	2	4	4	4	4	2	1	3	1	2	2	2	4	4	4	4	2	4	2	2	1	2	2	2	4	2	2	4
	1028	4		2	4	4	3	4	2	2	1	2	4	2	2	2	2	2	4	1	2	4	1	2	4	2	1	3	1	2	4	2	2	1	3	4	4	4	2	2	1	2	4	4	2	4	3	4	2
	1029	4		2	2	2	2	2	2	2	4	4	2	3	1	2	2	4	4	3	4	4	4	4	2	2	4	3	4	2	1	1	1	4	2	2	4	1	2	4	4	4	2	2	4	2	4	2	4
	1030	4		2	4	4	4	1	2	2	4	1	3	2	4	1	4	3	2	2	4	2	4	2	2	2	2	4	2	4	2	4	2	1	1	3	4	4	2	1	2	2	1	2	3	2	2	2	3
	1031	4		1	1	2	4	2	4	4	2	4	2	2	4	2	1	3	2	1	2	2	2	2	2	4	4	2	1	2	4	4	4	2	4	4	1	4	3	1	4	4	3	2	2	1	2	4	2
	1032	4		4	2	4	1	4	1	4	4	3	4	1	1	4	2	1	4	4	4	1	3	1	4	2	2	2	1	2	2	2	2	3	2	4	2	2	3	2	3	2	4	2	2	3	2	4	2
	1033	4		2	2	4	2	2	2	1	2	2	2	4	3	2	4	2	2	2	4	2	4	3	2	2	4	4	4	2	2	4	2	4	2	4	2	2	2	4	4	4	2	2	4	1	2	1	4
	1034	4		4	1	4	2	1	4	2	2	1	2	1	2	1	4	2	2	2	2	2	2	3	4	2	2	1	2	1	2	1	4	4	4	4	2	2	2	1	4	2	4	4	4	2	4	2	1
	1035	4		4	1	1	1	4	4	2	1	2	2	2	3	4	4	3	2	4	4	2	2	2	2	2	4	4	2	2	2	1	2	4	2	3	4	1	4	2	2	4	1	1	4	2	2	4	1
	1036	4		1	4	4	4	2	2	4	3	2	4	2	1	2	1	2	4	4	2	2	4	2	2	2	4	2	2	1	2	1	2	1	2	1	2	2	1	2	3	4	4	2	2	2	2	1	4
	1037	4		1	4	2	2	2	4	1	2	2	1	1	2	4	2	2	4	2	3	2	3	2	1	2	2	1	2	1	2	4	4	2	2	1	1	2	1	2	3	2	2	2	1	2	4	2	2
	1038	4		2	2	4	4	2	2	4	2	4	4	2	1	4	2	2	3	1	2	1	2	2	1	2	1	4	2	2	3	2	2	4	2	2	2	1	2	2	1	4	3	2	1	2	4	4	3
	1039	4		1	4	4	2	4	1	4	2	1	2	4	3	2	2	4	4	2	2	1	2	1	2	2	1	1	4	2	2	1	2	4	4	1	1	4	2	2	2	2	2	4	1	2	4	2	4
	1040	4		2	1	2	4	2	2	2	4	4	4	3	4	2	1	4	2	3	2	4	4	2	3	4	4	2	3	2	2	2	1	4	4	2	3	3	1	4	2	2	2	3	4	3	4	1	1
	1041	4		2	4	2	3	1	2	4	2	1	4	1	2	2	3	2	2	2	2	1	4	2	3	4	1	2	4	2	4	4	2	2	2	4	2	4	1	4	3	1	4	2	2	2	4	1	2
	1042	4		2	2	4	4	1	3	2	2	2	2	4	4	2	2	2	4	2	3	4	2	2	2	3	2	2	3	2	2	1	2	4	2	2	1	4	2	2	2	1	4	2	2	2	2	1	1
	1043	4		2	2	4	2	2	4	2	2	2	3	4	4	2	4	3	2	2	1	4	2	1	2	2	1	2	1	2	2	4	2	4	3	2	2	2	2	2	1	4	2	2	1	4	1	2	2
	1044	4		3	2	3	3	4	3	2	2	2	2	4	2	2	4	2	2	4	2	4	1	1	1	4	2	4	1	1	1	4	1	2	1	2	2	2	4	4	2	4	2	4	3	2	2	2	4
	1045	4		4	1	2	4	3	1	2	2	2	1	2	1	2	2	1	2	4	3	2	2	2	2	2	1	4	4	4	4	4	2	1	2	4	2	4	3	1	2	2	3	4	2	3	4	4	2
	1046	4		1	1	1	2	2	2	4	2	2	2	2	2	2	3	2	4	4	1	2	2	2	2	4	2	2	1	2	2	2	4	2	4	2	2	1	2	2	4	2	4	2	2	4	2	4	2
	1047	4		2	1	4	2	2	4	4	2	1	2	4	2	4	4	4	2	2	3	2	3	1	4	2	4	2	2	1	1	4	2	2	4	4	2	4	2	1	2	4	4	1	2	2	4	2	2
	1048	4		1	4	2	2	4	2	4	2	2	2	2	2	3	4	2	1	2	1	4	2	2	2	1	2	4	4	2	4	2	4	4	2	2	3	2	2	1	4	1	2	1	2	2	2	2	4
	1049	4		2	2	3	2	3	2	2	3	3	1	2	2	4	3	4	3	4	2	4	2	4	2	1	3	2	2	4	1	1	1	2	2	2	4	1	2	2	2	2	2	3	2	4	1	4	4
	1050	4		4	4	2	2	4	2	2	2	2	1	2	2	4	2	1	2	1	2	1	1	2	2	4	2	3	2	1	2	1	4	2	2	2	2	2	2	2	1	3	1	2	1	4	2	2	1
	1051	4		4	4	2	4	2	2	1	2	4	2	2	3	1	2	2	4	3	2	2	2	4	2	2	2	2	4	1	1	1	1	4	2	2	4	3	2	3	2	2	2	1	2	4	2	4	4
	1052	4		2	3	4	2	2	1	2	2	2	2	2	4	4	4	3	2	4	1	2	2	4	2	4	1	4	1	1	2	2	2	2	2	2	4	4	4	2	2	1	2	4	2	1	4	2	2
	1053	4		4	2	1	4	2	1	3	2	4	3	1	4	1	2	4	2	2	2	2	4	1	1	2	2	4	2	4	2	2	2	2	1	4	1	4	4	1	1	2	2	1	4	1	3	2	2
	1054	4		2	2	2	4	1	2	1	2	2	4	1	4	4	2	3	2	4	4	2	2	2	2	4	4	2	1	4	2	2	4	2	2	2	1	1	1	4	2	4	4	2	4	2	2	1	2
	1055	4		4	2	4	4	4	4	2	2	2	2	1	1	2	4	4	4	4	4	4	2	2	1	2	4	1	4	4	1	2	2	4	1	4	4	2	2	1	2	1	2	2	1	4	2	3	3
	1056	4		4	2	2	2	2	4	2	2	1	4	2	4	2	1	2	1	1	2	4	1	2	2	2	2	2	2	2	2	4	4	2	4	3	4	4	2	3	4	2	2	2	2	2	2	3	4
	1057	4		1	2	4	3	2	2	1	2	2	2	2	4	4	2	2	1	2	4	4	4	2	2	2	2	1	4	1	2	4	4	1	2	2	2	2	2	2	4	2	1	4	4	4	2	1	2
	1058	4		4	4	2	4	2	4	2	2	4	1	2	2	2	1	1	2	4	2	4	2	2	2	1	2	4	2	2	2	4	4	4	2	2	2	2	2	2	4	2	4	2	2	1	3	2	2
	1059	4		1	4	2	2	4	2	2	2	3	2	2	2	1	2	2	2	1	2	4	1	2	4	4	2	2	2	2	2	2	1	1	4	2	4	2	4	1	4	3	1	1	2	2	3	4	2
	1060	4		2	4	4	2	4	4	4	2	2	4	4	2	2	2	3	2	2	1	2	1	2	2	3	4	4	2	2	4	4	2	2	1	2	1	4	2	2	4	1	2	2	2	2	2	4	4
	1061	4		4	2	2	2	1	4	2	2	2	4	3	2	3	2	2	4	4	2	4	4	2	2	2	2	1	4	2	4	2	2	4	4	4	4	4	4	4	2	2	2	2	4	4	4	1	2
	1062	4		2	1	4	1	2	4	4	1	4	4	1	2	4	4	2	2	2	1	2	3	3	1	3	4	4	4	4	2	1	2	2	4	2	3	1	2	2	4	4	4	4	1	4	4	1	3
	1063	4		2	2	2	2	2	2	3	4	2	4	2	3	2	2	3	2	2	4	2	2	1	2	4	4	2	1	4	4	1	4	4	1	2	1	3	2	1	4	2	4	2	2	2	4	4	4
	1064	4		2	4	3	2	4	2	2	4	4	2	2	2	4	4	4	1	2	1	2	2	4	2	4	2	1	4	2	4	1	2	1	2	4	4	2	4	4	2	2	4	3	4	2	1	2	2
	1065	4		2	4	4	4	2	4	2	2	2	2	2	1	2	4	4	2	1	1	1	2	2	1	2	2	2	2	4	2	2	1	3	1	1	2	2	2	1	2	2	2	2	3	2	2	2	1
	1066	4		2	1	4	4	4	4	2	1	2	2	2	4	4	2	2	2	1	1	2	1	4	2	4	1	2	2	2	4	3	1	2	3	2	4	4	2	4	2	3	2	2	1	1	3	2	2
	1067	4		4	4	2	2	2	2	2	2	4	4	4	1	4	4	2	4	2	3	2	2	2	2	2	2	2	2	2	1	2	4	2	4	2	3	4	1	4	4	4	2	2	1	2	4	2	3
	1068	4		1	1	2	2	4	2	4	2	3	2	4	1	4	2	1	4	4	1	2	2	2	4	4	3	2	1	2	2	2	2	2	2	4	4	2	1	2	4	1	2	2	1	4	4	2	2
	1069	4		2	2	3	2	1	1	1	2	2	3	1	2	2	3	2	1	2	2	1	1	2	1	4	2	2	1	1	4	1	2	3	2	3	2	2	2	2	2	3	2	2	2	4	4	4	4
	1070	4		4	2	1	2	2	2	4	4	2	2	2	4	2	1	2	2	2	2	2	2	2	2	2	2	4	4	2	3	4	2	2	2	2	2	2	4	3	4	2	2	4	2	2	2	4	3
	1071	4		4	2	1	2	3	4	1	2	2	2	2	4	2	2	2	4	2	2	4	4	4	4	4	2	3	2	2	1	4	2	2	4	4	2	3	2	4	1	4	2	2	3	2	2	2	2
	1072	4		1	1	2	4	2	2	2	1	3	2	4	1	4	4	2	2	2	4	2	1	1	2	1	2	2	2	2	4	4	4	4	1	2	4	1	2	4	2	4	2	4	2	3	2	2	1
	1073	4		4	2	1	4	4	2	4	4	4	4	4	4	3	2	2	2	2	1	4	1	2	2	2	2	3	4	2	1	3	4	4	2	2	4	1	3	1	2	1	3	2	3	2	2	2	3
	1074	4		2	2	2	2	2	2	2	2	4	1	2	4	1	2	2	2	2	2	2	2	1	2	4	4	2	1	1	2	2	1	2	2	1	3	4	4	2	4	1	2	4	2	4	2	4	3
	1075	4		4	1	2	1	2	2	2	1	2	4	2	2	2	2	2	3	2	2	4	4	2	2	2	4	4	1	2	4	2	2	4	3	3	2	2	2	4	2	1	2	1	2	4	4	1	2
	1076	4		2	4	2	1	2	4	3	1	3	1	3	2	2	2	4	2	4	2	2	2	4	2	4	4	1	2	2	2	4	1	1	4	2	4	2	2	2	2	2	2	4	3	2	2	4	2
	1077	4		1	3	2	2	2	4	1	2	4	1	3	1	1	2	3	3	1	2	4	2	2	2	1	1	2	3	1	2	2	4	4	2	2	2	2	1	2	4	4	3	2	4	1	2	2	1
	1078	4		4	2	4	4	2	1	4	4	2	1	4	2	2	1	2	4	4	4	2	3	2	2	1	2	4	4	1	4	2	2	2	2	4	1	4	4	4	4	1	3	1	2	4	2	2	2
	1079	4		3	4	1	1	2	2	2	2	1	2	2	3	2	3	2	2	4	4	1	4	2	3	2	2	4	1	4	4	4	4	4	1	4	4	4	2	4	4	1	2	2	4	2	1	2	4
	1080	4		2	1	4	4	1	4	4	4	2	2	4	1	2	4	2	4	2	2	1	4	1	1	3	4	4	1	4	4	2	3	2	4	2	1	2	2	2	2	2	3	2	2	1	4	4	1
	1081	4		2	2	4	4	2	1	2	2	4	1	2	1	4	2	2	4	2	2	4	2	2	2	2	2	4	1	2	2	4	4	2	2	4	2	2	1	4	4	2	2	4	1	2	4	4	2
	1082	4		4	2	4	4	4	4	4	2	4	2	4	2	2	1	2	2	2	2	2	2	2	2	4	2	3	4	1	1	2	1	2	4	2	2	4	4	4	2	2	2	1	2	4	2	4	4
	1083	4		3	2	2	2	2	1	2	2	3	1	2	2	4	4	3	2	4	2	2	2	2	2	2	4	2	4	3	4	2	2	2	4	2	1	4	4	1	2	1	1	3	2	4	4	2	2
	1084	4		2	4	4	4	1	2	2	2	4	2	4	1	4	2	3	1	1	4	4	4	3	2	2	2	2	4	2	2	1	1	2	4	4	4	2	3	4	3	4	2	4	1	2	2	2	2
	1085	4		1	4	1	4	4	4	2	2	4	1	1	2	4	4	4	4	1	1	1	1	4	2	2	2	4	4	2	2	2	3	1	3	2	2	1	1	2	2	4	1	2	2	4	2	2	3
	1086	4		2	3	4	4	2	2	4	4	1	3	2	2	1	1	2	1	1	2	2	2	1	3	3	2	2	2	1	4	2	2	2	1	2	1	3	4	4	1	2	4	2	4	3	1	2	3
	1087	4		4	4	2	1	3	4	2	4	4	1	1	1	4	2	2	2	3	4	1	4	2	2	2	2	2	2	4	2	4	4	4	4	4	2	1	1	1	2	1	4	1	2	3	2	2	2
	1088	4		2	2	1	3	4	4	3	1	4	4	1	2	2	2	2	2	2	4	4	2	2	4	2	4	4	2	4	2	2	2	1	4	2	4	2	4	2	1	4	1	4	2	2	1	2	2
	1089	4		4	1	2	2	2	1	1	2	2	2	4	1	2	4	2	2	2	2	1	4	2	4	2	1	3	4	2	1	1	2	4	2	3	2	4	4	1	4	4	3	4	4	2	2	2	2
	1090	4		4	2	2	2	2	2	2	4	3	2	2	2	4	2	4	2	4	2	2	4	2	2	4	1	2	2	4	2	2	4	4	4	2	1	2	2	2	4	2	3	2	2	4	4	4	4
	1091	4		2	1	4	4	4	3	4	4	1	1	2	4	4	2	4	2	2	1	3	3	3	2	4	2	2	2	1	3	3	1	2	1	2	2	4	4	1	2	4	4	3	4	4	4	4	2
	1092	4		2	4	2	4	1	1	2	1	4	4	2	4	4	4	2	4	1	4	4	1	1	2	2	4	4	2	2	4	4	4	2	1	4	3	4	4	2	4	2	2	1	4	4	2	2	2
	1093	4		1	2	1	4	3	2	4	4	2	4	2	1	4	2	2	1	2	4	1	2	1	2	2	2	4	2	3	4	4	2	2	3	4	2	4	2	2	4	1	1	1	4	2	4	2	3
	1094	4		3	4	1	3	2	2	1	4	2	2	4	2	2	2	2	2	2	3	2	4	2	2	2	2	2	4	2	2	2	4	1	4	4	2	4	2	1	4	4	2	4	3	2	4	4	2
	1095	4		2	2	4	1	2	4	1	4	2	2	2	1	1	2	2	2	4	2	1	2	2	4	3	4	3	1	1	2	2	1	3	4	2	4	2	2	2	2	2	2	2	3	2	2	2	4
	1096	4		1	1	2	2	2	2	2	2	4	4	1	2	2	4	4	1	1	4	3	1	4	4	4	1	4	2	2	1	2	2	1	2	3	2	4	4	2	2	2	2	4	4	3	2	4	4
	1097	4		2	4	2	2	4	2	4	2	4	2	4	2	2	1	4	2	2	4	2	4	2	3	2	2	4	4	2	4	4	3	4	4	2	1	4	1	4	1	2	4	2	1	2	2	2	1
	1098	4		2	1	4	4	2	2	2	2	1	4	2	1	4	2	2	4	2	2	2	2	3	2	1	2	4	4	2	1	2	3	2	4	4	2	2	2	2	1	2	2	2	2	2	2	1	2
	1099	4		2	1	2	4	1	4	4	1	4	4	2	2	2	1	4	4	4	2	2	2	4	4	4	4	3	1	4	4	2	4	2	4	3	2	2	4	1	2	4	4	2	3	4	1	4	2
	1100	4		4	4	2	4	2	1	2	2	4	4	3	2	2	2	2	2	2	2	2	2	4	2	3	3	2	2	1	4	1	4	2	1	2	4	4	2	2	2	2	3	2	4	1	4	4	2
	1101	4		4	1	4	1	4	2	4	2	2	4	1	2	3	2	4	1	4	4	2	1	3	4	4	4	4	2	2	2	4	2	4	4	2	4	4	2	3	4	2	2	2	4	4	2	4	2
	1102	4		2	4	4	4	2	4	4	2	2	1	3	3	2	2	3	4	2	1	1	4	4	1	1	3	1	2	2	2	4	2	4	4	2	4	4	3	2	2	2	4	4	2	2	4	1	2
	1103	4		4	4	2	2	2	4	2	2	4	2	3	4	4	3	4	1	2	4	2	4	4	1	1	1	1	3	1	3	2	4	2	2	4	4	2	2	3	4	3	1	1	4	2	2	2	4
	1104	4		2	3	4	4	4	2	2	2	2	3	4	4	4	1	4	4	2	2	4	2	2	4	2	2	4	2	4	1	4	1	2	3	4	2	2	2	4	1	1	4	1	2	2	3	1	4
	1105	4		3	1	4	1	4	1	4	2	2	4	2	4	2	2	4	4	3	2	1	4	2	2	4	4	2	1	2	4	4	2	2	4	1	4	1	2	1	3	2	3	2	2	2	2	1	2
	1106	4		4	4	2	3	2	1	4	3	1	4	3	4	4	2	2	3	4	4	2	4	2	2	2	2	2	4	1	2	4	2	2	2	4	1	2	1	2	2	2	2	4	2	4	1	4	2
	1107	4		4	4	2	1	4	4	2	4	2	2	4	1	3	1	4	2	2	2	2	4	1	4	1	2	2	2	4	2	2	2	1	4	2	4	2	2	1	2	4	2	2	4	1	2	2	2
	1108	4		4	2	4	2	2	4	2	2	2	2	2	2	3	2	2	2	2	2	1	2	1	2	3	1	2	1	2	2	2	3	2	4	3	4	2	2	4	2	2	3	1	2	4	2	2	3
	1109	4		4	4	1	3	4	2	1	2	1	2	1	3	4	4	2	2	4	2	3	4	2	2	2	2	2	1	2	2	2	3	2	2	2	4	2	1	2	4	2	2	2	2	2	4	1	4
	1110	4		2	2	3	2	4	1	4	2	1	3	3	2	4	4	2	4	2	2	2	3	2	2	4	4	3	4	3	1	2	2	4	1	1	2	4	1	4	1	2	2	4	1	2	2	2	2
	1111	4		4	4	2	4	2	2	4	4	2	2	4	1	2	4	2	2	2	4	3	4	2	1	4	2	4	1	4	2	4	2	3	2	2	2	3	2	1	2	1	2	4	1	2	2	2	1
	1112	4		1	4	4	2	4	2	4	1	2	1	2	2	4	2	2	4	2	4	2	4	2	2	4	2	3	4	4	4	4	4	2	2	2	4	1	4	4	4	4	2	2	2	3	4	2	2
	1113	4		4	2	4	1	4	2	2	2	4	2	2	1	2	2	3	1	2	4	2	4	2	4	4	4	2	4	2	4	2	2	2	2	4	4	4	4	4	2	3	4	2	2	1	1	1	2
	1114	4		3	4	1	4	4	1	2	2	2	4	2	1	2	4	2	4	3	2	1	2	2	1	2	3	3	1	2	1	2	1	3	1	2	1	1	4	2	3	4	1	4	4	4	2	1	2
	1115	4		1	2	4	2	2	2	4	2	2	2	4	2	2	2	2	2	2	2	4	3	4	4	4	4	3	4	1	3	2	2	2	2	2	4	2	2	1	2	4	4	4	1	4	4	1	2
	1116	4		2	2	2	4	2	2	2	2	2	2	4	2	2	1	1	2	1	2	2	2	2	1	4	2	2	2	3	2	4	1	2	4	2	1	2	4	2	2	2	4	2	2	2	3	4	2
	1117	4		2	4	1	3	4	1	4	2	2	2	1	2	2	1	4	1	2	4	4	2	4	2	1	2	3	2	1	4	4	2	4	3	2	2	4	2	2	1	4	3	2	2	2	1	2	2
	1118	4		3	2	4	2	4	2	3	1	4	2	2	4	4	4	2	2	2	2	2	1	2	2	2	2	2	4	4	1	2	4	2	4	4	2	2	1	2	2	4	2	4	2	2	4	1	2
	1119	4		3	2	2	4	2	4	2	2	2	2	1	4	1	4	4	4	1	2	2	2	2	2	2	2	2	2	3	1	2	4	2	4	4	4	4	4	4	2	2	2	2	2	2	2	4	1
	1120	4		2	1	2	1	4	2	4	4	2	4	2	1	2	1	4	2	2	2	2	2	4	2	1	4	2	4	4	2	2	2	2	2	2	4	1	1	4	4	2	2	2	2	4	2	4	1
	1121	4		2	1	2	4	2	4	4	2	2	3	4	2	2	2	2	2	2	1	4	2	4	2	4	4	4	3	4	2	4	2	4	4	2	4	2	2	1	2	1	1	2	3	4	2	2	1
	1122	4		4	2	4	2	2	2	1	2	2	2	2	2	1	4	2	4	4	4	1	4	4	2	4	4	1	2	2	4	1	4	2	4	2	4	2	4	2	2	2	2	4	3	1	1	4	2
	1123	4		2	2	1	2	1	1	2	4	4	2	2	1	1	2	4	2	2	4	1	2	4	2	1	4	4	2	2	1	4	4	2	2	1	3	2	1	1	1	2	2	1	3	2	2	1	2
	1124	4		2	4	4	2	2	2	4	4	2	2	2	1	2	2	4	2	4	2	2	2	2	2	3	4	2	2	4	2	2	4	2	2	2	2	4	2	4	2	1	3	2	2	2	4	2	2
	1125	4		2	1	3	2	4	2	2	2	2	2	2	4	2	2	2	1	2	2	2	4	4	1	2	2	4	4	2	2	2	2	2	2	1	4	1	2	1	4	4	4	2	1	2	1	2	4
	1126	4		2	4	4	1	4	3	1	4	2	2	3	3	4	4	2	4	2	1	2	3	2	1	1	4	4	1	4	4	4	1	4	2	1	2	1	2	2	2	4	2	4	4	4	4	2	2
	1127	4		4	2	4	4	2	2	2	2	2	3	2	4	2	2	3	2	3	2	2	2	4	1	4	2	2	2	2	2	1	2	2	2	4	2	2	2	2	2	1	1	1	2	3	3	1	3
	1128	4		2	2	4	2	4	4	2	4	4	2	4	4	4	2	4	1	2	4	2	4	2	2	2	4	3	2	2	3	1	2	2	1	2	2	2	4	2	4	3	4	2	3	1	2	2	2
	1129	4		2	1	4	2	2	3	2	4	2	2	2	2	2	2	1	1	2	2	2	2	2	2	1	2	2	2	2	2	4	3	2	4	2	2	2	2	3	2	3	2	2	2	4	2	4	1
	1130	4		2	2	2	1	2	4	2	2	2	4	4	2	2	2	4	3	2	2	2	2	2	1	2	3	4	2	1	2	1	1	3	3	2	1	2	4	4	4	4	2	1	2	2	4	4	2
	1131	4		2	2	2	4	2	2	2	2	2	2	2	2	2	4	4	2	3	2	3	1	4	1	1	4	4	4	4	2	4	4	2	2	2	2	2	2	3	4	4	3	3	2	2	2	2	2
	1132	4		2	2	2	2	1	2	2	4	2	2	3	2	3	1	2	1	3	4	2	2	4	4	4	3	4	4	2	1	2	2	2	2	2	2	2	1	2	2	3	3	4	4	2	2	2	1
	1133	4		2	1	4	4	2	2	1	2	3	2	4	3	4	1	4	2	2	1	1	4	4	4	1	1	2	2	2	4	2	2	4	1	3	1	4	2	4	2	2	1	2	3	4	2	2	2
	1134	4		1	3	4	3	4	4	2	2	1	4	4	2	4	2	4	2	2	4	2	4	2	4	2	4	2	2	2	4	4	2	4	4	4	2	3	2	2	2	2	4	1	4	2	4	4	2
	1135	4		2	2	2	2	1	3	2	4	1	3	3	2	2	2	2	4	4	4	2	1	2	4	1	2	1	4	1	1	3	4	2	2	4	2	4	4	3	4	1	2	3	2	4	2	1	2
	1136	4		4	2	2	2	1	2	2	3	3	4	2	2	2	1	2	2	3	4	1	1	2	3	4	4	2	2	2	1	4	4	2	2	2	2	3	3	4	2	4	1	2	1	1	2	2	2
	1137	4		4	4	1	2	3	3	1	2	2	4	4	4	2	1	1	4	2	2	2	4	4	2	1	2	2	3	4	2	1	2	4	2	4	4	2	1	2	2	2	1	4	2	2	2	4	4
	1138	4		2	3	4	1	2	2	2	2	2	2	3	2	2	2	2	4	2	1	2	4	1	2	2	1	1	4	4	4	1	2	4	2	2	4	2	4	2	1	2	1	1	2	2	4	3	2
	1139	4		4	2	1	2	2	1	2	2	2	2	4	2	4	2	2	1	3	3	2	4	4	2	2	4	2	1	4	2	1	2	4	4	2	4	2	4	2	2	4	2	2	2	4	4	2	2
	1140	4		3	2	4	2	2	2	4	4	1	4	1	2	2	4	1	4	1	4	2	2	1	2	4	2	2	4	4	4	2	4	4	2	2	2	4	2	4	1	4	2	4	4	2	3	2	2
	1141	4		4	4	2	1	2	4	2	4	3	4	4	1	4	2	2	4	4	3	1	3	4	3	2	4	2	2	1	4	2	2	1	2	4	4	2	4	2	3	2	2	4	2	4	2	2	4
	1142	4		3	1	2	2	4	4	1	2	2	2	4	1	4	4	2	2	1	4	2	2	3	1	4	2	2	4	2	2	3	2	2	2	4	1	1	2	4	2	4	4	2	4	4	4	3	2
	1143	4		4	1	1	2	2	4	1	4	2	2	4	1	4	2	4	2	2	3	4	2	4	4	2	2	2	2	2	2	2	2	2	2	4	2	2	4	4	2	3	4	2	1	1	2	2	4
	1144	4		4	4	1	4	2	4	1	4	2	2	4	2	2	4	2	3	1	4	4	4	1	2	4	3	2	2	2	4	4	1	2	1	4	4	1	4	1	1	2	2	4	2	2	2	3	2
	1145	4		2	4	2	2	4	2	2	1	2	2	2	2	4	4	2	3	4	2	3	2	1	2	1	4	1	2	2	1	4	4	2	4	4	1	4	2	4	2	1	1	2	2	4	2	2	3
	1146	4		2	2	4	4	2	2	2	2	2	2	1	1	2	1	1	1	1	4	2	4	4	4	1	3	3	2	3	4	1	2	2	4	2	2	2	2	4	1	4	4	1	2	2	1	2	2
	1147	4		2	4	2	2	4	4	2	2	4	2	2	4	3	2	2	4	4	2	3	4	4	1	2	1	2	2	1	4	1	3	4	2	4	4	1	2	1	2	1	2	2	2	2	2	2	2
	1148	4		2	2	2	4	2	2	4	4	4	4	2	4	4	1	2	4	2	2	2	2	4	2	4	2	4	1	4	4	1	2	2	4	4	2	4	2	2	2	2	2	2	2	1	4	1	2
	1149	4		2	1	2	2	2	4	2	4	4	4	2	2	2	2	2	3	3	2	1	4	1	2	2	2	2	2	2	2	2	4	2	1	2	3	1	2	2	4	4	1	4	4	4	4	4	2
	1150	4		2	2	4	1	2	4	3	2	2	4	2	2	4	2	4	2	4	2	1	2	2	1	2	2	4	4	4	2	2	2	1	4	2	1	4	1	2	2	1	2	2	4	4	4	2	2
	1151	4		2	4	1	2	2	2	4	4	4	3	4	2	4	4	1	2	2	2	4	2	2	2	2	2	2	1	4	2	2	2	2	1	3	2	2	1	2	2	2	2	1	4	4	2	1	4
	1152	4		4	4	2	2	3	2	2	3	2	4	2	4	4	1	2	2	1	1	2	4	4	2	2	4	2	1	4	4	3	4	2	2	2	1	2	4	4	4	2	4	2	2	4	2	2	1
	1153	4		3	4	2	4	2	4	2	1	2	4	1	4	4	2	2	4	2	2	1	4	2	1	4	2	2	3	3	1	4	3	2	4	3	2	4	3	2	4	2	4	1	4	4	3	1	2
	1154	4		4	2	4	2	1	1	3	1	4	4	2	2	4	2	2	2	2	4	2	4	4	3	2	4	4	1	2	4	1	4	2	2	2	1	2	2	4	2	1	2	2	3	2	2	4	2
	1155	4		2	4	2	2	1	4	1	1	2	1	2	2	2	4	2	3	4	2	2	3	3	4	4	2	2	2	2	4	2	2	2	2	2	2	2	1	2	2	1	4	4	3	4	4	1	4
	1156	4		1	2	2	4	2	4	2	2	2	4	4	2	3	2	1	4	2	4	2	2	2	4	1	1	2	2	2	2	2	4	1	2	4	2	2	2	1	4	4	4	3	4	1	2	2	1
	1157	4		2	4	2	2	4	1	4	3	2	2	2	4	4	1	4	2	4	2	2	1	2	2	1	4	3	2	2	1	2	4	3	4	1	2	2	4	1	4	2	2	2	4	4	2	2	2
	1158	4		4	2	1	2	2	4	4	2	1	2	2	2	2	4	2	2	2	4	4	2	2	2	2	4	2	4	2	2	2	4	1	2	1	1	3	4	1	2	2	2	4	4	4	4	2	1
	1159	4		2	2	1	2	1	2	2	4	3	2	1	2	4	2	2	2	4	4	4	2	2	1	4	2	4	2	1	4	1	3	2	2	2	2	4	3	4	3	4	2	2	2	2	2	2	4
	1160	4		4	2	4	4	2	2	2	4	1	4	2	3	3	4	2	4	4	2	2	2	1	3	2	4	2	4	2	4	2	1	2	2	4	4	4	4	2	4	1	2	4	2	3	2	2	1
	1161	4		2	4	2	1	4	4	4	4	4	4	2	4	4	2	2	4	3	1	2	4	1	3	4	4	4	2	2	4	2	2	1	4	1	2	2	2	2	4	4	2	2	4	2	4	2	4
	1162	4		4	2	1	4	1	2	3	4	2	2	2	1	4	1	2	3	2	2	1	2	2	2	4	2	4	3	2	2	2	4	4	4	2	4	2	1	1	2	1	1	4	2	2	2	4	4
	1163	4		1	4	4	2	2	4	2	4	1	2	4	2	3	4	2	1	2	2	2	2	1	2	2	4	4	2	2	1	2	3	3	2	2	2	4	2	1	1	4	4	2	2	4	4	2	4
	1164	4		3	1	4	2	3	4	2	2	2	1	4	1	4	1	2	3	4	2	4	2	2	2	2	4	4	4	2	2	2	4	1	2	1	4	2	4	4	4	2	2	2	4	2	2	2	2
	1165	4		1	2	2	4	2	1	1	2	3	4	4	4	4	4	1	2	4	4	1	1	2	1	1	4	1	2	4	4	1	3	2	2	4	2	2	1	4	1	4	2	2	2	2	1	3	2
	1166	4		4	4	1	2	4	4	2	2	4	2	4	2	4	1	2	4	1	2	2	2	4	2	2	4	4	4	2	1	4	2	2	4	2	4	3	4	4	4	2	1	2	4	2	2	4	1
	1167	4		2	4	4	3	2	2	3	1	1	4	1	2	4	2	2	2	2	4	2	2	1	1	4	4	2	2	2	2	4	2	2	1	2	2	2	2	2	4	1	2	3	3	2	2	4	3
	1168	4		2	2	2	4	1	4	2	1	4	2	2	2	2	2	1	4	4	4	2	4	2	2	4	2	2	4	4	2	4	2	4	1	2	2	2	2	2	1	2	2	4	2	2	1	2	1
	1169	4		2	1	1	4	2	2	2	4	1	2	4	2	4	1	1	2	2	2	4	4	2	2	3	4	2	2	2	1	2	4	3	2	1	4	4	4	2	4	4	1	3	3	2	4	1	1
	1170	4		2	4	1	2	1	2	2	1	4	3	2	2	3	1	2	4	2	2	1	4	1	1	4	2	4	2	2	1	2	2	2	2	1	2	3	2	3	2	2	2	4	2	3	4	1	4
	1171	4		4	4	2	4	1	4	2	2	2	1	2	2	4	4	1	3	2	2	4	2	2	2	2	4	2	2	2	2	1	4	2	3	3	4	2	2	2	2	2	2	1	2	2	2	2	2
	1172	4		4	2	1	2	2	1	4	4	1	2	4	2	2	3	2	4	2	1	4	2	2	1	1	4	3	1	2	4	1	4	4	1	4	2	2	2	2	3	2	1	3	4	4	4	4	2
	1173	4		2	4	1	2	4	4	2	1	1	2	4	1	4	2	2	4	2	1	2	2	2	2	3	2	3	1	4	4	4	2	3	3	4	2	2	4	1	3	1	4	1	4	2	4	2	2
	1174	4		1	1	1	4	4	2	2	1	3	2	4	2	4	3	2	2	2	2	4	4	4	4	4	4	1	4	2	4	3	4	4	4	4	1	4	4	2	3	3	1	4	3	2	4	4	4
	1175	4		4	2	4	4	2	4	4	2	2	1	2	3	3	2	2	2	4	1	2	4	4	4	2	2	4	2	1	2	2	3	2	2	2	4	2	1	4	2	1	2	2	2	2	1	4	1
	1176	4		1	2	2	4	2	2	4	3	1	1	2	3	2	2	1	3	4	4	2	3	4	4	4	2	4	2	2	2	2	1	1	4	2	4	2	4	1	2	2	2	1	2	4	4	4	2
	1177	4		4	2	2	1	4	2	2	4	2	4	4	2	2	2	1	2	2	4	2	2	4	2	1	4	1	1	1	2	2	4	1	2	4	2	4	2	2	4	3	1	2	2	2	2	2	2
	1178	4		2	2	2	2	4	2	2	4	1	4	2	2	1	2	1	2	2	1	2	2	2	4	2	2	2	2	2	4	4	2	2	2	1	2	2	2	3	2	4	2	2	2	2	2	2	2
	1179	4		2	4	4	1	2	2	2	2	2	2	2	1	3	2	2	2	4	2	2	1	2	2	4	4	3	2	2	1	4	1	4	2	4	2	4	2	2	4	2	2	2	2	2	2	2	2
	1180	4		2	4	2	1	4	2	2	2	4	2	1	4	4	2	4	2	2	2	4	4	1	1	2	4	2	2	2	2	4	2	2	4	4	2	2	1	2	3	2	1	2	2	1	4	2	2
	1181	4		2	2	2	4	2	4	2	2	2	1	1	2	4	4	2	1	1	4	2	2	4	1	2	1	2	4	3	4	1	2	2	2	2	1	4	2	3	1	2	2	3	3	2	2	4	4
	1182	4		4	2	4	4	3	4	2	3	2	2	2	2	1	2	4	2	4	4	1	4	1	4	4	4	1	1	1	4	4	1	2	2	2	2	2	4	4	2	3	2	4	2	2	3	4	2
	1183	4		1	1	4	2	4	1	2	1	1	2	2	2	2	2	2	2	2	2	4	4	2	2	4	2	2	2	2	2	2	4	2	4	4	2	2	2	2	4	2	4	4	1	2	3	2	4
	1184	4		2	2	2	4	1	1	4	3	2	2	1	2	2	4	1	2	2	2	2	4	4	1	1	2	2	3	4	2	2	2	1	4	2	2	4	1	2	1	2	2	2	2	2	2	2	2
	1185	4		2	2	2	4	2	2	1	4	3	4	2	4	2	4	2	1	1	2	3	2	3	2	4	4	2	3	2	1	2	4	1	2	2	2	2	2	4	3	2	4	4	2	2	4	2	4
	1186	4		2	4	4	2	2	2	1	4	3	4	3	2	2	4	3	3	4	4	2	2	2	4	4	4	2	1	4	4	2	2	4	2	2	4	4	2	4	2	2	4	1	4	1	1	2	2
	1187	4		4	2	1	3	2	4	4	2	3	1	4	2	4	2	4	2	2	4	4	4	4	2	2	2	2	2	4	1	1	4	2	4	4	1	1	4	4	4	3	2	2	1	2	1	4	1
	1188	4		2	4	2	4	2	2	4	2	2	4	2	2	1	3	2	2	3	4	2	2	4	2	2	2	4	3	4	1	4	2	4	2	4	1	2	2	3	4	2	4	2	4	1	1	4	2
	1189	4		4	2	4	2	3	4	3	2	4	1	4	1	3	1	2	1	4	1	2	2	4	2	1	4	1	2	1	1	4	4	4	2	2	4	2	1	4	2	1	4	2	1	2	3	2	2
	1190	4		2	4	1	2	1	1	1	2	1	2	1	4	4	2	2	2	2	1	1	2	4	2	1	2	2	2	2	2	4	2	4	4	2	4	2	2	2	4	4	3	2	4	2	2	3	2
	1191	4		2	2	2	2	3	4	4	4	1	2	2	2	4	2	3	4	2	2	2	1	3	4	2	2	1	4	2	3	2	4	4	1	2	4	4	4	1	4	2	2	4	4	2	4	4	4
	1192	4		2	4	4	4	2	1	2	4	2	4	1	1	1	4	2	4	1	2	2	4	4	2	2	4	2	2	3	2	1	4	1	2	4	4	4	2	2	2	4	2	2	2	2	4	4	2
	1193	4		4	4	4	4	2	2	2	1	2	4	1	1	2	1	1	1	2	3	4	1	2	2	2	2	4	2	2	1	2	4	4	4	4	2	1	1	4	2	2	2	4	2	1	2	2	2
	1194	4		2	2	2	2	2	2	2	4	2	2	2	1	2	4	2	4	1	2	2	2	2	2	4	3	3	4	2	4	2	4	4	4	2	4	2	4	4	4	2	4	3	4	2	4	1	3
	1195	4		2	4	2	4	4	4	2	3	2	2	4	1	2	4	2	4	4	2	2	2	2	1	4	2	2	4	1	1	2	4	2	2	4	3	2	3	2	2	1	4	2	4	1	1	2	1
	1196	4		2	2	4	2	4	3	4	2	4	1	1	4	4	3	2	2	4	1	1	4	4	2	2	1	4	2	2	2	2	2	2	2	2	2	1	1	4	2	2	3	2	4	4	4	3	4
	1197	4		1	4	2	4	2	3	2	2	2	2	2	2	2	4	2	4	1	4	4	2	4	4	1	4	2	1	2	4	2	1	3	2	4	2	2	4	4	4	1	2	2	2	1	2	2	2
	1198	4		4	2	2	4	2	4	4	4	1	2	1	2	2	4	2	4	4	2	2	4	2	1	4	2	1	4	2	1	4	1	2	1	2	2	2	1	4	2	4	2	1	1	4	2	1	2
	1199	4		2	2	1	4	4	2	1	1	4	2	4	2	1	4	4	2	4	1	4	2	4	1	4	3	2	4	2	1	2	4	2	4	3	2	4	2	2	1	4	4	2	2	4	4	1	2
	1200	4		2	4	4	4	2	2	4	3	4	4	2	2	4	4	4	2	2	4	1	3	1	4	2	3	2	4	2	2	1	1	2	2	2	2	2	4	1	1	4	4	2	2	2	2	2	2
	1201	4		2	2	2	4	4	2	2	4	2	1	4	2	2	2	4	4	2	3	4	2	4	2	2	2	2	2	1	1	2	2	2	2	4	1	2	2	4	2	4	2	1	2	4	4	1	2
	1202	4		2	2	2	2	1	2	2	1	3	2	4	2	3	2	2	2	2	2	2	2	4	2	2	4	3	4	2	2	4	1	4	3	4	1	4	2	4	1	2	1	4	4	2	1	2	4
	1203	4		2	4	2	4	4	4	2	2	2	4	4	1	2	4	4	2	2	4	1	2	4	2	4	2	1	4	1	4	1	2	2	2	2	4	2	1	1	4	2	4	2	1	2	4	2	1
	1204	4		2	4	3	2	1	2	2	2	2	2	2	2	4	4	2	2	2	2	2	2	4	4	4	2	1	1	2	2	4	4	2	2	2	2	4	4	2	4	4	1	4	1	2	2	2	4
	1205	4		4	2	2	2	2	1	3	4	2	4	4	2	2	2	1	1	4	4	4	1	2	2	3	1	4	2	2	1	2	1	1	2	4	1	2	4	4	1	2	1	2	2	1	2	2	2
	1206	4		1	2	4	1	4	4	2	2	2	4	2	2	2	1	4	1	2	4	4	4	2	4	2	2	4	2	2	1	1	1	3	2	4	4	1	2	2	2	2	4	3	4	4	2	2	4
	1207	4		2	1	4	4	2	2	2	1	1	2	1	2	2	4	3	4	2	2	4	4	4	4	2	1	2	4	2	4	2	4	3	4	2	2	4	2	2	2	4	1	2	2	4	2	4	3
	1208	4		4	1	2	2	1	4	1	3	4	4	4	4	2	4	2	4	1	2	2	4	2	2	1	2	4	1	2	4	3	2	2	4	2	4	2	1	2	2	2	4	2	4	2	4	2	2
	1209	4		4	4	4	4	4	2	4	2	2	4	4	4	2	4	1	1	4	4	4	2	3	1	2	1	2	2	2	1	4	3	2	3	2	2	2	1	2	2	2	1	4	2	2	1	4	2
	1210	4		4	2	4	2	2	4	2	2	1	2	4	4	2	2	4	4	2	2	2	1	4	2	2	2	1	2	3	4	2	4	2	2	2	4	2	4	2	4	2	4	4	3	2	2	1	2
	1211	4		3	2	4	4	2	1	4	2	4	1	2	1	1	2	2	2	2	4	2	2	2	2	2	1	4	2	2	4	4	1	2	1	2	4	4	2	3	4	2	2	4	4	2	2	4	2
	1212	4		4	3	4	4	2	2	2	4	2	4	1	4	2	2	2	3	1	4	2	2	2	2	2	3	2	2	1	2	1	2	2	1	1	3	4	4	2	4	2	3	2	2	2	2	2	4
	1213	4		4	2	2	1	2	2	4	2	4	4	2	4	4	2	4	2	4	2	1	1	2	3	4	4	4	4	4	2	3	2	1	2	3	2	4	2	2	2	2	1	4	3	3	2	4	2
	1214	4		2	1	4	2	2	1	4	2	2	1	4	2	2	1	3	2	2	2	3	2	4	1	2	3	4	1	2	2	2	1	4	2	4	4	2	4	1	2	1	4	4	1	4	1	2	2
	1215	4		3	2	2	4	4	4	4	4	4	2	2	2	2	4	2	4	2	2	1	1	3	2	4	2	2	1	2	2	4	2	1	2	2	4	2	2	4	1	2	2	2	1	4	2	1	2
	1216	4		4	4	4	2	2	2	4	4	4	2	1	2	2	2	4	2	2	1	4	2	2	4	4	4	2	2	4	2	4	2	2	4	3	4	2	2	4	2	2	3	4	2	1	1	4	2
	1217	4		4	1	4	4	1	1	2	2	1	2	4	2	2	2	2	2	2	4	3	2	1	2	2	2	4	2	2	4	2	2	3	2	4	2	2	4	2	3	4	2	2	2	2	2	2	4
	1218	4		4	2	2	2	3	2	2	2	2	1	1	2	1	4	2	1	4	2	4	2	4	4	2	4	1	2	2	2	1	2	2	3	1	1	4	2	2	2	1	2	4	4	2	2	3	2
	1219	4		1	2	4	4	2	2	1	2	4	4	4	2	4	1	4	3	4	2	2	2	1	4	3	4	2	4	1	2	3	2	1	4	1	4	3	2	2	1	4	1	2	2	4	1	1	2
	1220	4		2	2	1	4	2	1	2	4	4	2	4	2	2	4	2	1	2	1	4	4	2	3	2	1	2	1	1	4	4	1	4	2	2	3	3	2	4	4	2	2	1	2	2	4	2	4
	1221	4		2	4	2	4	2	2	4	4	4	4	2	2	1	3	4	4	3	4	2	4	2	2	2	2	2	4	2	2	4	4	2	1	2	2	4	2	2	4	3	1	2	3	4	4	3	2
	1222	4		1	1	4	2	1	4	2	2	2	2	2	2	4	1	3	4	2	4	3	1	4	4	2	4	2	2	4	2	2	2	3	2	2	2	2	2	1	4	2	2	4	4	2	2	4	2
	1223	4		2	4	1	4	1	2	3	2	2	2	1	2	2	4	3	2	1	4	2	2	2	2	2	2	3	4	3	2	4	2	2	2	4	2	4	1	2	4	2	2	2	2	4	2	2	3
	1224	4		2	2	2	2	2	4	4	2	2	4	2	4	3	1	3	3	1	4	2	2	2	4	2	4	2	2	4	1	4	4	2	1	2	1	2	2	3	1	4	2	2	2	1	2	2	2
	1225	4		2	2	4	4	4	3	2	4	1	4	4	1	2	2	4	1	2	4	1	2	2	1	2	4	2	1	4	2	2	2	2	4	4	4	3	4	2	2	2	1	4	2	4	2	4	2
	1226	4		2	2	4	4	4	2	1	4	4	2	3	4	2	3	2	2	4	4	1	4	1	3	4	1	4	4	2	2	2	1	4	1	2	3	4	2	2	1	1	2	2	2	1	1	4	2
	1227	4		2	2	1	2	2	2	1	4	3	2	4	2	1	4	2	4	4	2	4	2	4	2	1	2	2	2	1	4	3	1	2	4	2	2	2	4	2	4	4	1	3	2	2	2	2	1
	1228	4		2	4	2	2	2	4	1	2	1	4	2	1	2	3	4	3	1	2	2	2	4	1	4	2	2	2	3	2	4	4	4	2	4	4	2	4	4	2	1	1	3	3	4	2	4	2
	1229	4		4	2	2	2	3	4	2	4	1	2	4	2	2	2	2	4	1	1	4	4	1	2	2	3	3	3	2	2	3	4	2	1	2	4	2	4	2	3	2	1	4	2	4	2	4	2
	1230	4		2	2	2	2	2	2	2	2	4	1	4	1	3	2	4	2	4	4	3	2	1	4	2	4	2	4	1	2	2	4	4	2	4	1	1	3	3	4	4	4	2	1	1	1	1	4
	1231	4		1	3	2	4	1	2	4	2	3	1	1	4	2	4	3	2	1	4	3	2	2	3	2	2	4	2	4	1	1	2	4	2	1	4	4	1	4	4	1	4	2	3	2	2	1	4
	1232	4		2	2	4	4	2	2	1	4	2	4	3	4	2	4	4	3	2	4	4	2	4	1	1	2	2	2	3	2	2	1	2	3	2	2	2	4	2	4	2	2	2	4	4	4	4	4
	1233	4		4	2	2	1	2	4	2	3	2	2	1	2	2	4	4	2	2	4	2	2	2	2	2	4	2	2	2	2	2	2	2	2	4	4	1	4	2	2	1	3	3	2	4	4	4	4
	1234	4		4	2	3	4	2	3	2	4	1	4	4	2	2	3	2	4	2	4	2	2	4	4	4	3	2	4	2	3	2	1	1	1	4	2	2	4	2	4	2	4	4	2	1	4	4	1
	1235	4		4	2	2	4	4	4	2	2	2	2	4	2	4	4	4	2	4	2	4	2	2	1	2	2	1	2	2	2	2	4	1	2	2	4	2	2	1	2	3	4	3	1	2	2	2	2
	1236	4		2	4	2	4	2	2	2	1	3	2	2	4	2	2	2	1	3	4	3	2	4	4	4	1	4	2	2	2	2	2	3	1	2	4	2	2	1	4	2	2	4	2	2	2	1	1
	1237	4		2	2	2	2	4	4	4	2	4	2	2	2	1	4	2	1	4	4	1	2	2	2	2	2	4	4	4	4	2	4	4	4	2	4	2	4	1	4	4	2	4	2	1	2	2	2
	1238	4		2	4	4	2	4	2	1	4	4	2	2	2	4	4	4	2	2	2	2	2	3	1	4	1	2	2	2	2	2	2	2	4	2	2	2	4	2	2	2	2	2	3	4	2	2	1
	1239	4		1	2	1	2	2	4	4	4	2	3	2	1	4	2	2	4	4	2	4	4	1	1	4	2	4	3	2	1	2	4	2	4	2	2	1	3	4	2	4	2	2	1	2	2	4	1
	1240	4		3	2	4	4	4	2	2	4	4	2	2	2	2	4	2	4	2	2	4	1	2	4	1	2	2	2	1	2	4	2	2	4	4	1	4	1	1	2	4	3	2	2	2	4	4	1
	1241	4		4	3	4	2	2	2	1	2	2	3	2	2	4	2	2	2	4	4	2	1	2	4	2	4	4	4	2	4	2	2	2	2	2	4	2	1	3	2	4	4	3	2	4	2	2	4
	1242	4		2	4	2	2	4	4	2	2	2	3	4	1	1	1	2	2	2	4	2	1	4	2	2	1	3	2	2	2	2	2	2	1	1	4	2	2	2	2	2	4	2	2	2	2	4	2
	1243	4		2	2	4	2	4	4	2	1	4	2	3	2	4	2	4	2	4	4	3	2	4	2	2	2	2	2	2	4	2	4	2	2	4	4	2	2	4	1	2	4	3	4	1	2	4	1
	1244	4		2	2	1	4	2	1	1	2	3	1	2	2	2	1	4	2	2	2	4	2	4	2	4	2	2	2	2	2	3	4	2	4	2	2	4	2	4	2	2	4	2	2	4	3	4	4
	1245	4		4	2	2	3	4	2	4	2	4	4	4	1	2	2	2	2	4	1	3	4	2	1	1	2	2	2	2	2	4	4	4	4	2	4	2	4	2	4	2	4	1	2	4	1	2	2
	1246	4		1	2	2	4	4	4	1	2	2	2	4	1	2	1	4	4	2	3	2	2	2	4	1	2	2	4	3	4	3	4	2	2	2	4	2	4	4	4	4	2	4	4	2	3	2	2
	1247	4		2	2	3	2	2	3	2	3	2	1	4	3	2	2	1	3	2	2	4	2	1	2	4	2	4	4	1	4	1	1	3	4	3	4	1	2	2	3	2	2	2	4	3	2	2	3
	1248	4		1	4	4	4	2	4	1	4	4	4	2	1	2	2	2	1	1	3	1	2	2	1	1	2	2	2	2	4	4	1	2	2	1	2	2	2	2	3	4	2	4	2	4	4	2	2
	1	1		2	2	4	2	4	4	2	4	2	3	2	2	2	4	2	2	1	4	4	2	4	1	2	4	4	1	2	2	2	2	2	2	4	2	3	4	2	2	2	2	2	3	2	2	4	4
	2	1		1	4	2	2	1	2	2	1	4	1	2	2	4	2	2	4	2	2	3	1	1	2	2	2	4	2	1	2	1	2	2	2	1	4	2	4	4	2	2	2	4	2	3	4	2	2
	3	1		4	2	2	4	1	4	2	2	3	2	2	1	1	2	4	4	4	4	2	2	2	2	2	1	3	2	4	2	4	4	4	4	2	2	4	2	2	4	2	3	2	2	1	4	3	4
	4	1		2	2	1	2	2	1	2	2	2	1	3	4	2	2	4	3	3	4	4	1	2	2	4	2	1	2	4	1	2	3	4	2	2	2	2	3	1	1	4	1	2	4	4	1	4	2
	5	1		2	2	1	4	2	4	2	1	4	4	2	2	1	1	4	2	3	1	4	1	3	4	1	1	4	2	2	2	2	2	4	1	2	1	4	2	1	3	2	4	4	4	4	2	2	4
	6	1		2	2	3	2	2	2	2	3	1	4	2	3	1	4	2	1	4	2	1	1	4	1	1	2	3	2	4	2	2	2	2	4	2	2	3	4	1	2	2	2	2	4	2	2	4	1
	7	1		2	4	3	2	2	4	1	2	1	2	4	1	4	4	2	4	4	2	2	2	2	2	2	2	4	1	4	2	2	2	2	2	4	2	4	2	2	3	2	2	3	4	4	2	3	2
	8	1		4	4	2	2	2	4	2	2	2	4	3	3	2	2	2	4	4	4	2	2	4	4	2	2	4	2	2	4	2	4	3	4	2	4	1	4	3	3	2	4	1	2	4	2	2	2
	9	1		1	4	2	4	2	1	1	2	1	4	2	2	2	2	2	4	2	2	4	3	1	2	4	4	3	4	4	2	4	3	2	2	1	4	2	3	2	2	4	2	1	1	4	2	4	1
	10	1		2	2	2	4	3	4	2	2	2	2	2	4	4	2	1	4	4	2	2	1	2	3	1	1	2	2	2	2	4	4	2	4	4	2	2	4	1	3	3	2	2	3	2	4	2	3
	11	1		1	4	2	2	1	4	4	2	2	4	4	2	2	4	1	3	1	2	4	2	2	3	2	2	4	1	2	2	1	1	1	1	4	2	2	4	4	2	2	2	1	4	1	2	3	1
	12	1		2	4	2	2	2	2	2	4	2	2	4	1	4	2	4	2	2	4	2	4	4	2	2	2	2	2	4	2	4	4	2	1	2	2	3	2	4	2	4	2	4	2	1	4	2	2
	13	1		4	1	2	3	2	2	1	2	2	2	2	2	2	4	4	4	2	2	2	4	4	2	4	2	4	2	4	2	4	4	2	3	4	1	2	4	2	2	4	2	2	4	4	2	2	2
	14	1		2	2	2	1	2	1	2	2	2	1	2	2	2	4	2	1	4	1	2	1	4	4	2	1	4	1	4	4	1	4	2	4	2	2	2	2	4	2	3	3	3	4	1	4	2	2
	15	1		2	4	4	3	2	4	1	2	2	4	1	3	2	4	1	2	4	2	2	2	2	2	4	2	2	4	4	4	2	4	2	1	2	4	2	2	3	2	4	2	2	4	2	4	4	3
	16	1		4	1	2	2	2	2	2	4	4	2	2	2	1	4	2	4	4	1	2	4	4	2	2	1	2	1	2	2	2	1	3	2	2	1	3	2	2	4	2	1	1	1	4	2	3	2
	17	1		2	4	2	4	4	1	4	2	2	2	4	2	2	2	2	2	2	2	4	3	4	2	3	2	2	1	4	2	3	1	2	4	4	4	2	2	4	2	2	3	2	4	2	2	4	2
	18	1		2	1	4	2	1	4	2	2	2	2	3	2	2	1	1	2	4	2	4	2	4	4	3	3	2	2	2	4	2	4	2	2	1	4	1	1	2	4	4	2	4	4	3	1	2	2
	19	1		2	4	4	4	2	2	1	4	3	3	1	1	2	2	2	2	2	4	3	4	1	2	4	4	2	2	1	2	4	3	2	3	2	2	1	2	1	1	2	4	2	2	2	2	2	4
	20	1		2	3	2	2	2	2	3	4	4	4	2	2	4	2	1	2	1	4	2	2	4	2	2	1	4	2	2	1	2	2	2	2	4	4	2	2	3	4	2	3	3	3	4	4	4	2
	21	1		1	4	4	2	4	1	4	4	2	4	2	3	2	4	4	4	2	4	2	1	2	2	2	4	2	1	2	2	4	4	2	4	4	4	4	4	2	2	2	1	2	4	1	4	2	2
	22	1		4	1	1	1	2	2	2	2	4	2	2	3	2	4	1	2	4	2	4	1	2	2	2	2	2	4	1	2	2	2	2	4	3	2	4	1	4	2	2	3	2	2	4	1	2	2
	23	2		4	4	2	1	1	4	4	3	4	2	1	1	4	2	2	2	2	2	4	4	4	2	1	4	2	2	2	4	1	1	4	2	3	2	1	1	4	2	2	3	2	2	1	1	2	4
	24	2		4	4	4	2	2	2	2	1	3	2	1	4	1	2	3	2	1	4	2	4	4	2	2	2	2	2	2	1	4	4	4	2	4	2	2	4	2	2	4	4	2	2	2	3	2	4
	25	2		4	1	4	4	2	2	2	4	2	2	2	3	2	1	2	4	2	2	2	2	2	4	2	2	4	4	4	1	2	2	2	4	2	4	1	1	2	4	2	4	4	2	4	2	3	2
	26	2		4	2	2	3	4	1	4	1	2	2	4	2	4	2	1	2	4	4	2	2	1	2	2	2	1	2	4	2	2	2	2	2	4	4	1	4	2	4	4	2	4	4	4	2	4	1
	27	2		2	2	2	4	2	2	1	1	2	2	2	4	1	4	2	1	3	2	2	2	2	4	2	2	2	2	2	4	3	2	2	2	3	2	2	3	2	4	4	1	2	2	4	2	4	2
	28	2		2	4	2	3	2	4	1	2	2	1	4	4	4	2	2	4	2	2	1	3	1	4	1	4	1	2	1	4	4	2	4	2	2	4	1	4	4	4	2	4	2	2	2	4	2	4
	29	2		1	3	3	4	1	2	2	2	1	2	2	2	4	1	1	2	2	2	1	2	4	1	3	1	1	3	2	1	2	2	4	4	2	4	2	2	4	2	4	2	4	2	4	2	2	2
	30	2		2	2	4	2	2	4	2	4	4	4	2	4	2	3	4	4	3	2	2	4	2	2	1	1	4	2	2	2	1	4	2	4	4	2	2	2	1	3	2	2	2	2	4	2	2	4
	31	2		4	2	4	1	2	3	4	2	2	2	4	4	3	4	2	4	2	2	2	1	2	4	3	4	4	4	4	1	2	4	2	4	2	2	2	1	4	2	1	2	4	1	2	2	1	2
	32	2		2	4	4	2	1	1	2	4	4	2	2	1	1	2	4	2	1	2	2	2	4	2	2	2	1	2	2	1	4	2	2	2	2	1	2	4	4	3	4	3	2	2	2	4	2	2
	33	2		1	4	4	4	4	2	3	4	1	3	2	2	4	4	4	2	4	2	4	2	2	3	2	2	2	2	1	3	1	4	2	4	4	4	2	4	4	1	2	2	1	2	4	1	1	2
	34	2		4	2	2	2	4	2	4	2	4	4	4	1	2	4	2	2	4	4	4	3	2	2	1	4	2	2	2	1	2	4	1	1	3	2	2	2	4	2	2	2	2	1	2	4	2	2
	35	2		4	2	2	4	3	2	4	2	4	2	2	2	1	1	2	2	1	2	2	2	2	3	1	4	2	2	3	4	4	2	2	2	4	2	2	3	2	2	1	4	2	4	2	1	2	4
	36	2		4	4	2	3	1	4	1	4	4	2	3	2	4	2	4	4	2	2	4	1	2	4	2	2	2	2	2	4	2	4	2	1	2	2	2	2	1	2	4	3	2	2	2	2	4	3
	37	2		4	4	2	1	3	4	2	2	2	2	2	1	4	1	2	2	4	3	4	2	3	2	1	2	1	4	4	1	4	1	1	1	1	4	3	2	4	3	2	2	1	2	2	2	2	4
	38	2		2	1	4	2	1	2	1	2	2	2	2	4	4	1	1	2	1	2	2	2	4	1	2	2	4	2	1	4	2	3	3	2	1	2	3	2	4	2	2	1	2	2	1	3	2	4
	39	2		2	2	4	2	4	2	4	4	4	4	3	2	4	4	4	3	2	2	4	4	4	2	4	2	4	2	1	2	4	2	1	2	1	1	2	2	2	3	2	4	2	2	2	2	4	1
	40	2		4	1	4	2	1	2	1	4	2	2	2	1	4	2	4	1	2	4	4	2	2	3	1	2	3	2	1	2	2	1	4	4	3	1	2	4	2	1	2	2	2	1	4	4	2	4
	41	2		4	2	2	1	2	2	4	2	4	4	3	4	2	4	3	3	4	2	1	2	4	4	2	1	4	4	2	2	4	2	4	4	2	2	1	2	2	1	4	2	1	2	4	1	1	1
	42	2		1	2	2	1	2	2	4	3	1	2	2	2	3	1	1	2	2	3	1	1	4	2	4	2	4	4	2	1	4	3	2	1	2	1	4	2	4	1	4	1	2	4	2	3	1	4
	43	2		2	2	4	2	4	2	2	1	2	1	2	1	4	4	2	4	3	1	1	4	1	1	1	4	2	2	2	4	3	4	2	2	2	1	4	1	2	4	1	1	2	2	2	2	2	4
	44	2		2	4	4	4	4	2	2	2	4	4	2	4	1	2	1	2	2	4	4	4	4	2	2	4	4	2	2	4	4	2	2	4	2	3	2	4	2	4	4	1	4	4	2	4	4	1
	45	2		2	2	4	1	1	2	2	2	1	2	4	4	1	4	4	4	4	4	2	2	4	2	2	2	2	1	4	2	2	4	1	1	2	2	2	2	4	2	2	4	2	2	4	2	4	3
	46	2		4	2	4	3	2	3	1	2	1	2	4	2	4	1	4	3	2	2	2	4	2	4	4	2	2	2	4	2	2	2	1	1	2	3	4	4	2	2	4	1	2	4	2	3	2	4
	47	2		4	2	4	4	4	3	4	2	4	2	4	2	2	2	1	4	1	2	2	2	4	4	2	4	4	2	2	4	3	2	4	4	4	1	4	4	1	2	3	2	2	3	2	2	1	2
	48	2		2	4	2	1	2	4	4	2	4	4	2	2	4	2	4	1	1	2	2	3	2	4	4	2	2	4	2	3	2	3	2	1	4	1	4	1	1	2	2	4	2	4	3	2	4	2
	49	2		2	2	2	2	2	2	4	2	4	2	1	2	2	2	2	4	2	4	2	2	2	4	2	2	2	3	4	2	1	2	2	4	2	4	2	4	3	2	4	2	2	2	2	4	1	2
	50	2		2	4	3	2	2	2	3	4	4	1	3	2	2	3	3	4	4	4	2	4	1	2	1	2	2	1	1	2	2	1	1	1	2	2	1	4	4	3	2	4	2	2	4	2	2	4
	51	2		2	2	2	2	3	1	2	4	4	2	2	2	4	4	2	1	2	4	2	4	1	2	2	2	4	2	1	1	2	2	4	4	4	1	4	4	2	1	2	2	1	1	4	4	4	2
	52	2		4	2	2	1	1	1	4	1	2	4	2	2	1	4	3	1	1	4	3	2	4	4	3	4	2	2	4	4	4	2	2	2	2	4	2	3	4	4	1	4	4	4	4	4	4	4
	53	2		2	1	2	4	2	4	2	2	1	2	2	1	2	2	4	4	1	3	2	2	2	2	2	1	4	4	2	2	4	2	1	2	2	4	1	2	1	2	4	2	2	4	2	2	2	2
	54	2		2	1	2	2	2	4	4	1	2	2	3	4	4	4	2	2	1	4	2	2	2	4	4	2	2	1	2	4	4	2	3	2	2	2	2	2	2	3	2	2	2	2	2	2	1	2
	55	2		2	4	1	1	2	4	4	1	2	4	2	4	4	4	2	4	2	2	2	2	1	2	1	4	1	2	2	1	4	2	1	4	2	2	1	2	4	2	2	4	4	2	4	2	1	2
	56	2		3	2	4	4	4	1	4	4	2	2	2	2	2	4	2	2	1	2	2	2	4	4	1	2	2	2	2	2	2	1	2	2	4	2	2	2	4	4	4	2	2	4	2	2	2	2
	57	2		1	2	4	4	2	2	3	2	2	4	4	4	4	4	4	2	4	2	2	4	4	1	2	4	1	2	1	2	2	1	2	2	2	4	2	2	4	1	1	2	2	4	2	2	1	3
	58	2		4	2	4	2	1	2	2	2	4	2	2	2	2	4	1	4	1	2	2	1	2	4	2	2	1	2	4	2	2	1	2	4	2	2	1	4	2	2	1	2	2	2	2	2	3	2
	59	2		2	4	4	1	1	3	1	2	4	4	3	4	2	1	2	4	2	2	4	2	2	2	2	4	4	4	2	1	4	4	2	3	3	2	2	2	4	3	1	3	2	4	3	1	2	2
	60	2		1	2	4	2	4	2	2	2	4	1	2	4	1	2	2	2	1	1	1	4	2	2	2	1	4	4	2	2	4	2	2	2	1	1	1	2	1	3	2	2	2	2	2	3	4	1
	61	2		2	4	2	2	3	1	2	2	3	2	2	4	4	2	2	1	4	1	2	4	2	2	4	2	4	2	2	2	4	1	4	4	2	2	1	1	4	2	2	1	1	3	1	2	4	4
	62	2		4	2	2	4	1	1	1	4	2	2	2	1	3	1	3	4	3	3	3	1	3	4	2	4	1	4	4	2	2	4	4	3	4	4	4	1	2	1	4	2	2	3	1	2	3	4
	63	2		2	2	1	2	2	2	1	2	2	4	2	2	2	2	2	1	2	4	2	1	2	2	4	4	2	2	3	1	4	4	2	4	2	1	2	2	2	2	2	2	4	2	2	2	4	2
	64	2		1	3	3	4	2	1	4	2	1	1	2	3	1	2	4	3	4	2	2	4	2	1	2	2	4	1	4	1	2	2	2	2	2	2	4	2	1	2	2	3	2	1	4	2	1	2
	65	2		1	4	2	2	4	1	4	4	2	2	2	2	4	2	2	1	4	4	4	2	1	2	2	2	4	4	1	1	4	4	4	2	4	2	1	1	2	2	2	2	1	2	2	2	1	2
	66	2		4	2	4	4	2	4	2	1	1	2	4	2	4	1	4	1	2	1	4	1	4	4	2	4	2	3	2	1	2	1	2	4	4	2	1	2	2	2	4	2	1	1	2	2	3	3
	67	2		1	4	2	2	4	2	2	1	2	2	2	1	2	4	4	4	4	2	2	4	4	2	2	4	4	4	2	2	1	4	4	4	3	2	4	4	4	4	2	2	3	1	2	2	2	4
	68	2		4	4	4	2	2	2	1	4	1	2	4	1	4	2	2	4	2	2	4	1	2	2	3	4	2	2	2	2	2	1	2	4	3	4	2	4	4	4	2	2	2	2	2	2	4	1
	69	2		2	4	4	2	4	4	2	1	3	2	4	3	2	1	1	4	4	4	2	2	3	1	1	2	4	4	2	3	4	4	3	2	2	2	4	2	4	2	2	2	4	1	1	1	1	2
	70	2		2	3	2	2	2	4	2	4	4	2	2	2	4	2	2	1	2	2	2	2	2	2	4	2	1	4	3	2	4	4	1	4	1	2	3	2	2	2	3	2	4	4	2	1	2	4
	71	3		4	1	3	2	1	2	2	4	2	1	4	1	4	2	1	1	4	2	2	2	3	3	2	3	2	2	4	2	4	1	2	1	2	4	2	2	4	4	4	4	4	3	4	4	4	2
	72	3		2	2	2	1	4	4	3	4	4	3	2	2	4	4	1	4	2	2	1	4	2	2	2	4	2	4	2	2	2	2	2	4	2	1	2	4	4	2	2	2	2	3	4	2	4	4
	73	3		2	2	4	4	4	2	1	4	4	2	2	2	2	2	4	2	3	4	4	1	4	2	4	4	4	4	2	2	2	4	4	3	4	2	3	2	4	1	2	2	4	4	2	2	1	2
	74	3		2	4	1	2	2	2	2	4	4	2	2	3	4	1	2	1	4	1	2	2	1	2	2	2	2	1	4	4	1	1	4	1	4	4	2	2	1	4	2	4	2	2	4	2	2	2
	75	3		2	4	4	2	3	2	2	4	2	1	4	2	4	1	2	3	2	2	2	3	4	2	2	2	2	4	2	4	4	2	1	4	4	2	2	1	2	4	1	4	2	4	2	2	2	1
	76	3		2	2	2	2	1	2	2	4	2	4	2	3	1	2	2	4	1	2	2	4	2	4	2	2	4	1	2	1	1	1	2	1	4	2	1	2	2	4	2	4	2	4	1	4	1	4
	77	3		2	2	2	2	4	2	1	3	2	2	1	4	2	1	4	1	4	4	1	4	2	2	4	2	2	4	3	3	2	4	4	2	4	1	2	2	4	1	1	4	2	4	2	4	1	2
	78	3		2	2	4	4	2	2	2	2	1	4	4	3	4	4	4	4	3	2	2	2	4	1	4	2	4	4	2	1	2	1	2	3	2	2	2	2	4	2	1	1	4	4	3	1	2	2
	79	3		1	2	2	4	2	4	1	1	3	4	4	4	2	4	4	2	1	4	2	1	2	1	2	4	2	2	4	2	2	1	2	2	4	4	1	1	1	1	2	2	2	4	2	4	4	2
	80	3		2	3	4	2	3	2	2	4	4	2	1	2	4	4	2	1	2	1	2	4	4	4	1	2	4	2	1	2	4	4	2	4	2	4	4	2	4	2	2	2	1	4	1	4	2	3
	81	3		1	1	4	2	2	2	1	4	2	1	2	4	1	2	2	1	2	4	2	2	2	2	4	4	4	3	4	2	2	4	1	2	2	3	4	2	4	1	2	2	2	2	3	2	2	3
	82	3		4	2	2	2	1	4	2	2	1	4	2	2	2	4	2	4	2	4	2	2	1	2	2	4	2	2	4	2	2	4	2	1	2	4	4	2	3	2	4	2	2	2	1	2	1	1
	83	3		4	2	3	1	4	2	2	4	2	2	1	2	2	2	1	1	4	3	4	4	4	2	2	4	2	4	2	2	2	1	2	2	4	2	2	2	1	4	1	2	4	2	2	1	1	2
	84	3		4	2	2	3	2	2	1	1	1	2	2	4	2	4	1	4	2	4	3	4	2	1	1	2	4	2	2	2	4	4	1	2	2	2	1	2	2	1	2	4	4	2	2	2	4	1
	85	3		1	1	2	4	2	2	2	4	2	4	4	2	4	2	4	2	2	2	4	2	3	2	2	2	2	3	4	4	2	4	4	2	2	3	4	4	2	2	3	4	2	2	2	2	3	1
	86	3		4	4	1	4	2	2	2	3	2	2	2	2	2	3	1	2	2	2	2	4	2	4	4	2	1	2	4	4	4	2	4	4	3	2	1	2	1	3	2	2	4	2	2	2	1	1
	87	3		2	3	1	2	2	4	4	4	4	1	4	2	4	2	2	2	2	1	1	4	2	2	3	4	4	2	4	2	1	2	2	1	2	2	4	4	1	4	4	4	4	2	4	3	4	2
	88	4		1	1	4	2	1	4	4	4	4	2	2	2	2	4	3	4	2	2	4	2	1	2	2	2	4	1	1	1	2	2	2	1	2	2	2	4	1	4	1	4	1	1	1	1	4	2
	89	4		2	2	2	2	4	4	4	2	2	2	2	2	2	3	2	1	4	1	4	4	2	2	4	2	2	3	4	4	2	4	4	4	1	4	2	1	4	2	2	3	4	1	1	2	4	1
	90	4		1	1	1	4	2	2	2	1	1	1	4	4	1	4	1	4	1	2	4	2	4	2	4	4	2	4	4	2	2	4	1	4	2	2	4	4	2	1	4	2	2	2	2	1	2	2
	91	4		4	4	2	2	2	4	4	2	3	2	2	2	4	3	1	2	2	4	2	4	4	2	1	1	2	2	1	2	2	4	2	4	2	2	2	2	2	2	2	2	4	2	1	1	4	3
	92	4		4	1	2	1	2	2	1	4	4	4	2	2	4	2	2	1	2	1	4	4	2	4	4	1	2	3	4	2	1	4	4	4	1	2	2	4	2	4	4	2	2	2	2	2	2	4
	93	4		4	2	2	1	4	4	1	2	2	4	2	1	2	4	2	4	2	4	2	2	2	2	2	4	2	2	2	2	2	4	2	2	4	2	3	1	4	2	3	2	4	1	1	4	4	2
	94	4		1	4	2	2	2	2	2	2	1	4	2	1	2	4	1	4	2	4	4	4	2	4	4	4	1	2	1	4	4	2	4	2	4	1	2	4	2	2	2	3	3	2	2	4	4	2
	95	4		4	1	4	4	2	1	2	2	2	2	2	4	1	4	4	3	2	1	2	1	2	2	3	4	2	3	4	2	2	2	2	2	2	2	3	4	1	2	2	4	2	4	2	1	4	2
	96	4		2	4	2	2	2	1	2	4	1	2	4	2	4	2	2	4	2	4	1	4	2	4	4	2	2	4	2	3	4	1	1	4	2	1	2	2	4	2	2	1	1	4	4	4	4	3
	97	4		3	1	3	1	2	4	2	4	2	2	3	2	3	4	1	2	2	4	4	2	2	1	4	2	4	2	2	2	2	2	2	1	1	2	4	1	1	2	1	2	2	2	2	4	1	1
	98	4		4	2	2	3	4	2	1	1	4	2	4	2	2	2	1	2	4	4	2	4	4	1	4	3	2	4	1	4	4	2	3	1	4	2	4	4	2	1	1	1	2	4	2	4	1	2
	99	4		4	3	2	2	3	1	2	2	2	2	2	4	3	2	2	3	2	4	2	2	4	1	4	4	4	3	2	1	3	4	2	2	2	2	2	2	2	4	2	2	2	2	4	4	1	4
	100	4		4	2	2	1	3	4	1	4	4	2	2	4	2	4	3	2	2	2	2	2	3	2	4	2	2	4	2	4	2	1	2	4	2	4	3	2	4	2	2	2	4	4	4	2	2	2
	101	4		4	2	1	2	2	1	1	3	4	1	3	2	2	4	4	2	1	2	2	3	4	2	4	3	4	4	3	2	4	2	2	3	3	2	2	2	1	1	2	2	2	4	2	2	2	2
	102	4		2	2	4	2	4	4	4	3	4	4	4	2	2	2	2	4	2	3	2	2	3	2	2	4	4	2	2	4	2	2	4	2	4	2	1	2	4	2	4	1	2	3	4	4	4	2
	103	4		2	2	1	3	2	1	4	2	4	2	2	4	2	4	2	3	1	2	1	2	4	2	2	3	4	1	1	2	2	3	1	1	2	2	2	4	2	2	2	1	2	2	1	1	2	3
	104	4		2	1	4	2	4	2	2	2	4	1	2	4	1	4	2	4	4	1	1	1	2	2	2	4	2	2	2	1	1	4	4	4	4	2	3	3	2	3	4	4	2	2	2	1	2	2
	105	4		4	2	2	2	2	4	1	2	2	2	1	2	4	2	2	4	3	1	2	2	4	4	1	1	2	2	4	3	2	4	2	1	4	2	4	1	2	1	4	4	2	2	2	2	2	1
	106	4		2	3	4	2	4	4	4	4	4	2	4	2	1	2	4	2	2	1	4	2	2	2	4	4	4	4	2	2	4	2	2	2	4	1	3	2	1	2	2	2	4	2	3	3	1	4
	107	4		2	2	2	4	1	4	4	3	1	2	2	2	1	2	2	4	2	2	1	2	2	2	2	4	4	4	2	3	2	4	2	4	2	1	2	4	2	2	2	1	2	4	3	2	2	1
	108	4		4	4	2	2	4	2	2	1	4	1	1	4	3	4	2	2	2	2	2	2	3	2	1	3	1	4	3	2	1	2	4	2	2	2	3	1	4	2	2	2	2	1	4	4	2	4
	109	4		2	2	2	4	2	4	1	4	2	2	4	1	2	2	2	2	2	1	2	4	4	2	2	2	2	2	4	1	4	4	4	2	2	3	1	4	4	2	2	2	1	3	2	1	2	2
	110	4		2	4	1	4	3	2	1	3	2	2	4	1	4	4	2	2	4	4	4	1	4	4	2	4	2	2	1	2	2	4	2	2	4	3	1	2	2	4	4	4	2	2	4	4	4	2
	111	4		2	4	2	2	4	2	2	2	4	1	2	2	4	1	4	1	4	4	2	2	1	4	4	1	2	4	4	4	1	2	2	1	4	3	3	4	1	2	1	4	4	2	2	2	4	2
	112	4		4	4	2	1	2	3	2	2	4	4	4	4	2	1	2	2	4	2	2	2	2	4	2	4	2	4	4	2	2	2	2	2	4	4	1	4	2	2	2	2	4	1	2	2	2	2
	113	4		3	3	2	4	4	2	2	2	4	4	4	4	2	1	1	2	3	4	2	2	2	2	4	4	2	4	2	2	2	2	2	4	4	1	2	2	4	1	2	1	2	2	4	2	3	3
	114	4		2	2	4	1	3	2	1	1	4	2	1	1	2	1	2	4	4	4	2	3	2	4	2	2	4	2	4	4	4	2	2	2	1	4	2	1	4	1	2	3	2	2	3	2	2	4
	115	4		2	4	3	4	4	4	4	1	2	2	4	1	2	2	4	2	2	2	2	2	4	4	2	4	2	3	4	1	2	2	2	3	2	4	3	4	4	4	2	2	2	2	2	4	2	2
				1	3	3	1	1	3	4	1	2	3	4	2	1	4	4	2	1	4	4	2	3	2	2	2	4	3	4	2	2	4	2	1	2	2	4	4	1	2	2	4	4	4	2	4	1	2
				2	2	1	4	4	2	3	2	4	2	4	4	2	4	2	2	4	4	2	4	2	2	2	2	1	4	2	2	2	2	3	2	4	4	3	3	2	2	1	2	4	2	2	4	4	4
				2	4	2	2	1	1	2	4	2	2	4	4	2	2	2	2	2	4	4	2	1	3	4	2	1	4	4	2	4	4	2	2	2	4	2	2	1	2	3	1	2	2	1	1	2	2
				2	3	4	1	4	2	3	4	4	2	2	2	1	4	2	4	1	1	4	4	4	1	2	2	4	2	4	2	2	2	1	4	4	2	3	2	2	2	2	2	1	4	1	2	2	1
				2	2	1	4	2	2	1	4	2	2	2	2	2	2	2	4	2	3	4	3	1	2	2	2	4	2	4	2	1	2	4	4	2	2	4	1	4	4	2	2	2	1	2	2	2	2
				2	4	2	4	2	4	2	2	4	4	4	1	4	3	4	2	1	4	1	4	4	2	4	4	2	3	4	2	4	3	4	2	1	1	1	1	1	4	4	4	4	4	2	4	2	4
				2	4	1	3	4	4	4	4	4	2	1	2	2	2	4	4	1	2	2	1	3	3	1	2	1	1	2	2	3	2	1	2	4	4	1	4	4	4	2	2	4	2	2	4	1	2
				4	4	1	2	1	2	4	2	1	2	2	2	2	2	2	4	2	2	1	1	1	2	2	2	2	1	4	3	2	1	4	2	2	2	1	2	4	4	2	3	4	2	2	2	4	1
				2	4	2	2	2	2	2	2	1	1	2	2	2	4	2	4	4	3	1	3	1	3	4	2	4	4	4	4	1	2	1	2	3	3	2	2	1	4	2	1	2	4	2	2	2	2
				4	2	3	1	4	2	1	2	2	3	3	2	4	4	2	3	2	2	4	1	3	3	3	4	3	2	2	2	1	3	2	2	2	4	2	3	1	4	2	4	2	4	1	4	2	4
				2	3	2	4	4	2	2	2	1	2	2	2	2	2	2	3	4	2	2	2	2	4	1	1	4	2	2	2	4	2	4	3	2	4	4	2	2	2	2	2	2	1	4	1	2	2
				2	2	4	4	1	2	3	4	2	4	1	2	2	4	4	2	2	2	1	1	2	1	2	2	4	1	2	4	2	2	3	1	1	2	4	2	4	2	3	2	2	1	2	2	2	2
				2	2	2	4	4	4	1	4	4	2	1	2	4	2	2	2	2	2	4	4	2	2	2	4	4	2	2	4	2	1	2	2	4	2	4	1	3	4	2	2	2	2	1	4	2	2
				1	2	2	4	4	4	4	1	1	4	4	2	4	4	4	2	4	2	2	1	2	2	1	4	2	4	2	2	1	2	2	4	2	2	2	2	1	4	4	4	3	1	4	2	1	4
				4	4	1	3	2	2	2	4	2	4	4	4	2	2	1	2	4	2	2	4	1	2	4	2	2	3	2	4	1	2	2	3	2	4	2	4	4	2	4	4	2	1	3	2	2	4
				4	4	2	2	1	2	4	1	4	2	4	2	4	4	4	2	4	4	4	2	1	2	3	4	2	2	2	1	2	4	2	4	4	2	4	2	2	1	2	4	2	1	2	3	2	4
				2	4	3	1	2	2	4	3	2	2	4	2	3	2	2	2	3	4	1	4	4	4	2	1	1	1	4	4	3	4	4	2	2	2	3	3	4	2	2	3	4	4	2	2	4	2
				1	1	2	4	2	1	2	3	2	2	2	2	4	4	3	2	2	2	2	4	4	1	2	2	2	3	4	2	3	2	2	1	4	4	4	4	2	4	4	1	1	4	1	4	2	2
				1	2	2	4	2	2	4	4	2	4	1	1	2	2	4	2	1	2	2	4	4	2	2	2	2	1	2	2	2	3	2	1	4	4	1	2	2	2	4	3	4	4	4	2	2	2
				2	2	3	2	2	1	4	2	2	4	4	2	2	2	2	2	1	2	1	2	1	1	2	1	3	2	1	2	2	2	2	2	2	1	3	2	4	2	2	4	4	2	2	2	2	2
				3	2	2	1	2	1	1	2	2	4	3	1	4	4	4	2	1	2	2	4	4	2	2	2	1	4	4	4	2	1	3	1	3	4	4	1	2	2	3	3	1	2	4	4	2	4
				2	4	1	1	4	4	2	4	3	2	4	2	1	2	4	2	2	2	4	2	2	4	2	3	2	1	2	2	2	2	1	2	4	1	2	2	2	2	3	4	4	2	1	1	2	3
				1	2	2	4	4	2	2	1	1	1	2	2	4	4	1	4	2	3	4	3	1	4	2	4	2	2	2	2	4	4	1	2	1	4	4	1	2	4	2	1	1	2	2	2	2	2
				2	2	2	4	4	2	2	1	2	4	2	2	4	2	4	4	1	2	2	4	2	2	2	4	2	2	2	4	2	2	4	4	3	4	2	3	4	2	2	1	3	2	2	2	4	3
				3	1	1	3	1	2	2	2	4	3	2	2	4	4	2	1	2	1	2	2	2	1	2	2	3	4	2	1	1	1	4	1	4	2	1	1	2	4	1	4	2	2	2	4	4	2
				3	4	4	4	2	2	3	2	4	2	4	2	4	4	4	1	2	2	4	3	1	2	2	2	2	2	2	2	1	2	2	2	2	2	4	4	2	2	2	2	4	4	2	2	2	4
				3	2	4	4	2	2	1	1	2	1	4	1	2	2	1	1	4	2	2	2	4	4	4	2	4	2	1	2	2	2	2	1	2	1	1	1	1	2	4	1	4	4	4	4	4	2
				2	2	3	4	3	3	4	2	2	2	4	4	2	4	1	2	2	4	1	2	2	1	2	4	2	3	3	4	2	2	1	2	2	2	2	4	2	4	1	4	1	4	4	3	4	4
				3	3	1	2	3	2	4	4	3	2	2	4	4	3	2	4	2	1	4	1	1	3	4	2	4	2	4	1	2	2	3	2	1	2	2	4	4	4	4	2	2	4	4	2	2	2
				2	2	4	1	2	2	1	2	2	2	1	4	2	1	4	2	2	1	2	4	2	2	4	1	3	4	2	2	4	4	1	1	2	1	2	4	2	2	2	2	2	2	2	3	2	4
				3	4	1	4	2	1	4	4	2	4	2	4	3	1	2	1	3	2	4	4	1	2	4	2	2	4	2	2	2	2	2	4	1	4	2	2	1	2	2	2	1	1	2	4	2	2
				2	4	2	4	2	4	4	2	4	3	2	2	2	4	2	3	2	2	1	2	2	2	4	2	2	2	2	4	4	4	1	2	4	1	2	4	2	4	1	1	2	2	1	4	2	2
				4	2	2	1	1	3	3	1	4	3	2	1	2	2	2	4	4	2	2	2	4	1	1	2	4	2	2	4	1	2	3	2	1	2	2	4	3	2	2	2	4	2	2	2	2	2
				2	1	4	1	4	2	2	1	4	2	1	2	4	4	1	2	3	3	2	4	4	2	2	1	1	2	3	4	2	2	4	2	2	4	4	4	4	2	4	2	1	2	4	2	2	1
				3	2	2	2	4	4	1	4	4	4	2	2	1	4	4	4	2	1	2	1	4	2	2	2	2	2	1	4	2	2	3	3	4	1	2	2	4	4	2	3	2	2	4	2	4	2
				2	4	3	4	3	2	2	3	1	4	2	2	1	2	4	2	2	2	2	2	4	1	4	2	2	4	2	1	1	4	2	4	2	4	2	4	2	4	3	4	2	2	2	2	2	3
				4	4	4	3	2	4	2	2	4	2	4	2	4	1	4	2	1	4	4	1	4	4	4	1	4	2	1	4	1	4	1	2	2	2	2	4	2	2	1	2	4	2	4	2	4	1
				2	3	3	2	4	4	2	2	4	2	2	2	2	2	2	2	2	2	2	2	4	2	4	2	2	2	1	4	1	2	2	2	1	3	2	1	4	2	2	4	2	1	4	1	4	1
				1	2	4	4	2	2	4	1	4	2	4	4	2	4	1	2	4	3	1	3	3	2	1	2	1	1	2	3	4	1	2	2	1	2	2	4	2	2	4	2	2	3	2	4	1	4
				3	2	2	2	2	2	2	2	2	3	4	2	4	2	1	2	2	2	1	1	2	2	4	2	4	4	2	2	2	1	1	2	4	2	2	1	4	2	2	1	2	4	2	4	4	2
				1	1	3	4	2	2	3	4	2	1	1	4	3	4	2	4	4	3	4	4	2	4	2	1	4	2	4	2	2	4	2	2	1	2	2	4	2	2	2	1	4	2	2	3	4	2
				2	2	4	2	1	2	2	2	2	1	4	4	2	4	1	4	2	2	2	4	1	2	2	1	2	2	2	4	2	3	4	4	4	2	2	2	2	4	2	2	1	2	2	4	4	4
				4	2	4	2	3	4	1	4	4	2	4	1	2	4	4	2	2	4	2	1	1	4	1	3	2	2	4	2	2	1	2	4	4	2	4	4	1	2	4	2	3	1	2	4	4	4
				2	4	2	4	2	2	2	2	2	1	4	2	4	2	2	4	4	2	2	3	1	3	4	2	2	1	2	2	1	1	3	3	2	2	1	3	2	4	2	4	2	1	2	4	4	2
				3	3	4	2	2	4	4	2	4	2	2	2	2	1	2	2	4	1	4	2	3	4	4	2	1	3	2	2	2	2	4	1	4	2	2	2	3	2	4	4	2	2	2	1	4	2
				4	4	4	2	2	4	1	2	2	1	1	4	1	4	1	2	2	2	2	1	1	3	2	1	4	4	2	4	1	3	2	2	2	2	3	4	2	2	2	2	2	2	1	1	4	4
				4	1	2	1	4	2	4	2	1	4	4	2	1	1	2	2	2	1	1	2	1	4	4	1	4	2	2	3	4	2	2	4	2	4	2	2	4	2	4	4	4	1	1	4	2	2
				1	2	2	2	2	4	1	2	2	1	2	3	2	4	1	3	2	2	4	4	4	3	3	2	4	1	2	4	2	4	2	2	2	4	1	2	3	1	1	2	2	4	2	3	2	2
				2	4	4	4	2	4	2	4	1	2	2	4	2	4	4	2	1	3	2	2	1	2	1	4	3	2	1	2	4	1	2	3	4	2	4	2	3	2	2	1	4	4	2	3	4	4
				2	2	2	2	2	2	2	2	4	2	2	2	2	4	2	4	1	2	1	4	3	2	4	2	4	2	3	4	2	2	2	2	1	1	4	4	1	2	4	2	4	2	4	4	4	2
				1	4	2	1	2	4	4	2	4	4	2	2	1	2	2	2	3	2	1	4	4	4	2	2	4	1	1	4	4	2	2	2	2	2	2	2	4	4	1	2	4	2	1	2	4	4
				1	1	2	1	3	1	2	2	2	4	2	3	2	2	2	2	2	2	2	1	2	3	4	4	1	4	2	3	4	2	2	2	4	1	4	3	2	3	4	2	2	2	4	1	2	2
				2	2	2	2	2	4	2	4	2	4	1	2	2	3	2	4	3	4	2	2	4	4	4	2	4	2	4	4	4	2	2	4	1	2	3	2	1	4	2	2	3	3	1	1	2	2
				1	4	3	2	4	4	2	2	2	4	2	3	1	2	3	4	2	2	3	1	2	4	1	4	4	1	4	3	2	2	2	1	4	4	4	1	2	2	4	4	2	3	2	2	2	4
				2	3	4	1	2	2	2	2	4	4	4	2	1	2	2	4	4	2	3	4	4	4	1	2	4	2	2	2	4	3	1	4	2	4	3	2	3	1	2	1	1	1	2	2	1	1
				2	2	2	1	2	2	2	2	1	2	1	1	2	4	3	2	2	1	4	2	2	4	1	2	4	1	4	1	4	2	1	2	4	2	2	2	1	1	2	4	4	3	2	2	4	2
				1	2	1	2	2	4	2	4	2	1	4	1	2	4	4	1	2	4	4	4	2	1	3	4	4	2	3	1	2	4	2	2	4	2	2	1	2	2	2	2	2	1	4	4	4	2
				2	4	4	1	4	2	2	2	1	3	2	1	1	2	2	2	1	2	3	2	4	4	3	1	1	4	2	2	2	4	2	2	2	2	3	1	2	2	2	4	2	2	4	4	2	2
				4	2	2	3	4	2	2	2	3	4	2	4	2	2	4	1	2	2	2	1	2	1	1	2	2	3	1	2	3	1	1	4	2	2	3	4	2	3	2	4	4	2	2	1	2	2
				1	2	2	4	4	4	2	1	2	2	4	1	2	2	4	1	2	2	2	2	1	4	4	4	2	2	1	4	2	1	3	2	1	1	4	4	4	2	4	4	2	4	4	1	1	4
				2	2	2	4	2	2	4	2	4	2	1	2	2	2	1	4	2	4	2	4	2	1	2	4	4	2	4	4	2	2	1	2	2	3	3	1	4	4	4	2	1	2	1	2	2	2
				4	2	3	3	2	2	4	4	2	2	2	2	2	3	4	2	2	1	4	2	4	1	4	4	1	2	4	4	2	3	1	2	2	2	4	4	2	1	4	3	2	2	2	4	2	2
				2	1	2	4	3	4	3	2	2	2	2	4	4	2	4	2	4	4	2	1	4	2	1	2	2	2	1	2	2	1	4	2	2	2	2	4	1	2	4	1	2	4	2	4	1	4
				1	4	2	2	2	4	4	2	1	2	2	2	2	4	2	4	2	2	2	4	1	2	3	4	1	2	2	4	1	1	2	1	3	4	4	2	2	2	2	2	4	1	4	4	2	4
				2	2	2	2	3	4	4	1	2	3	3	2	1	1	2	4	4	2	4	3	2	1	2	1	1	4	1	4	4	2	4	4	4	1	3	2	1	4	2	3	2	4	2	2	4	2
				4	1	2	4	2	4	2	2	1	2	4	2	2	1	4	4	2	4	4	2	4	1	2	2	2	4	4	2	2	2	4	2	4	4	2	3	2	4	1	4	2	2	2	4	2	4
				4	2	2	3	3	4	2	2	2	3	2	2	2	2	4	4	2	2	2	2	2	4	2	4	2	3	1	3	2	2	2	1	2	2	1	2	1	4	1	4	3	4	3	4	4	4
				2	4	2	2	4	4	4	2	2	2	4	2	3	3	2	2	4	1	1	4	2	1	4	4	3	4	2	2	4	1	1	1	2	2	2	3	4	3	4	2	2	2	1	2	4	2
				2	4	2	2	2	4	4	1	4	4	2	2	2	2	4	2	1	1	2	2	2	2	4	4	4	1	4	2	2	2	1	1	4	4	4	4	1	4	4	4	4	4	2	2	1	2
				2	2	2	4	2	2	4	2	2	2	2	4	4	1	2	2	2	2	1	2	4	2	3	4	4	2	4	4	2	2	2	2	2	1	2	2	1	4	2	2	2	2	1	4	4	1
				2	2	4	3	2	2	4	1	1	2	4	4	2	2	1	1	4	1	2	2	4	4	2	4	2	4	2	2	3	2	4	4	4	4	2	2	2	1	1	1	2	2	1	2	4	4
				4	3	2	1	4	2	2	4	4	1	2	4	2	2	4	4	2	2	4	2	2	2	2	2	4	2	2	2	4	1	1	3	2	4	2	3	2	4	2	4	2	3	2	2	1	4
				2	4	2	4	2	4	2	4	4	4	4	3	2	2	4	4	3	4	2	2	4	2	4	2	3	2	4	3	1	2	4	2	1	4	4	2	4	1	2	2	2	2	4	2	4	1
				2	2	1	4	3	2	2	1	2	2	4	2	2	2	2	4	4	2	4	4	4	2	4	2	2	4	3	4	4	1	2	1	2	4	4	2	2	3	4	2	4	2	2	4	1	2
				1	4	4	2	3	4	2	2	1	4	4	2	1	3	2	2	2	1	2	4	1	1	2	2	2	2	1	2	4	2	2	2	1	1	4	2	2	2	2	2	4	2	2	2	4	2
				2	2	2	1	4	4	2	3	4	1	2	2	4	2	1	4	2	1	2	4	3	2	2	2	4	2	3	4	3	1	3	2	1	2	2	1	3	2	2	2	4	2	1	2	2	1
				2	4	1	2	1	2	4	3	2	1	2	3	4	4	1	4	3	2	2	4	2	2	4	1	2	4	2	2	4	2	4	4	2	2	2	4	4	1	1	2	1	2	1	3	4	3
				2	2	2	2	2	2	2	4	3	3	2	2	4	2	2	2	4	2	4	3	1	1	2	1	3	2	2	2	4	4	1	2	1	2	2	2	4	2	2	1	4	4	1	2	4	4
				2	4	2	2	2	2	4	2	2	2	4	2	4	4	3	2	2	2	2	2	2	4	2	4	2	3	2	2	2	4	4	4	4	1	2	2	2	4	2	2	2	4	4	2	2	2
				4	4	3	2	2	2	1	1	4	2	4	4	1	4	2	4	1	1	3	4	2	2	4	4	4	4	1	2	2	1	2	2	4	2	2	4	2	4	4	2	2	2	2	2	1	4
				2	2	1	2	2	2	3	2	2	4	2	2	4	2	4	3	4	2	2	2	4	4	2	4	1	4	2	1	4	4	1	4	1	4	4	1	4	4	2	3	4	1	3	1	1	1
				3	4	3	4	2	1	2	2	4	2	1	2	1	2	2	2	2	2	4	4	2	4	4	2	2	2	4	1	4	2	3	4	2	2	2	2	2	2	2	2	3	2	2	2	3	3
				4	4	1	2	4	1	1	1	2	2	2	2	4	2	1	4	4	2	4	2	4	2	2	1	2	3	1	2	1	1	2	4	2	2	4	4	1	2	4	2	4	4	2	2	4	4
				4	1	2	4	2	2	2	4	2	3	2	4	1	2	1	1	2	2	1	4	4	2	1	2	4	2	2	4	2	4	4	2	2	2	2	4	4	4	1	2	2	2	4	2	2	2
				2	1	2	1	1	2	1	3	2	4	4	2	2	2	4	4	1	4	4	4	2	4	4	2	1	4	2	4	4	2	4	4	2	2	4	2	2	2	2	1	2	2	2	2	2	2
				2	2	2	1	4	4	2	2	4	2	2	4	1	2	2	1	4	4	2	2	2	3	4	4	2	2	4	4	4	2	2	4	2	2	2	1	2	3	4	1	2	2	2	3	1	1
				4	4	4	4	2	2	2	2	1	2	4	1	4	4	2	2	4	1	1	2	4	2	2	4	2	3	2	4	3	1	3	4	3	3	4	2	4	2	2	2	1	2	2	2	1	1
				3	1	4	3	3	2	4	2	2	2	2	2	1	2	2	2	3	1	2	2	2	2	1	2	2	4	2	4	4	1	2	2	4	1	4	4	4	4	2	4	4	2	1	1	1	4
				1	2	2	3	2	2	4	4	2	2	4	4	4	4	4	1	2	2	2	2	2	1	4	2	2	2	2	2	2	2	2	2	1	4	4	2	4	2	4	2	2	2	1	2	1	4
				2	4	1	4	4	3	2	4	3	2	2	3	2	3	2	4	1	2	2	2	2	2	2	2	1	1	4	4	2	4	2	2	2	1	1	2	4	2	2	4	2	4	4	4	2	2
				1	4	2	4	1	4	4	2	1	1	2	4	4	4	2	2	2	2	3	2	1	2	2	4	4	2	4	2	3	4	2	4	4	2	1	4	4	4	1	1	3	2	4	1	4	4
				2	3	2	4	2	2	2	4	2	4	1	2	2	3	2	1	1	1	2	2	2	2	1	2	2	2	2	1	2	2	3	2	4	2	2	4	4	4	4	4	1	2	2	4	1	2
				2	4	4	2	2	2	4	4	4	2	4	2	4	4	2	4	2	4	1	2	2	1	2	2	2	1	4	2	3	4	2	4	2	2	2	4	4	2	1	1	4	3	4	2	2	4
				1	4	2	2	4	1	2	2	2	2	4	2	4	4	4	1	2	4	2	3	3	2	2	2	2	2	4	2	2	4	4	4	2	4	2	2	2	2	2	2	4	2	2	2	2	2
				2	1	2	2	4	1	1	4	2	2	2	1	1	2	2	4	2	2	2	2	2	4	4	2	4	1	4	3	3	2	2	2	4	4	1	3	4	1	4	2	4	4	4	2	2	2
				2	4	2	1	4	1	4	2	2	4	4	2	2	2	2	3	2	3	2	2	4	2	4	4	1	2	2	2	2	4	2	2	2	2	2	2	2	2	4	1	1	4	1	4	4	4
				4	1	1	1	1	2	4	2	3	4	2	4	4	2	4	4	2	4	4	2	4	2	1	2	3	1	4	4	1	1	4	1	4	2	2	2	2	2	2	1	1	1	2	2	2	4
				4	2	4	4	1	2	2	2	4	2	4	4	2	2	4	2	2	2	2	4	2	2	4	4	4	2	2	2	4	2	2	3	3	1	3	2	1	4	1	2	4	2	4	4	2	4
				2	4	2	3	4	2	2	1	1	4	4	3	4	2	2	2	2	1	2	2	2	3	2	3	4	2	4	2	2	4	1	4	2	2	2	2	2	1	4	4	2	1	4	2	2	2
				2	2	1	1	4	3	2	2	4	3	2	2	1	4	1	4	2	2	2	2	3	1	3	2	4	2	4	4	2	1	2	2	2	2	3	2	2	2	2	2	4	4	2	4	2	2
				2	3	2	4	4	2	2	1	4	4	4	1	2	2	4	4	2	1	2	4	2	2	2	1	2	2	2	4	4	3	2	2	3	4	4	2	2	2	2	2	4	2	2	2	1	2
				4	2	2	2	2	4	2	4	2	4	4	4	2	4	2	1	2	4	1	2	2	1	1	4	2	2	3	2	2	2	2	2	2	2	3	3	4	4	4	1	2	2	2	2	3	4
				2	2	4	2	1	4	2	2	1	4	4	2	4	2	2	2	3	2	2	2	3	2	4	2	1	2	4	4	4	3	2	4	2	4	4	2	4	2	2	2	1	2	4	2	3	2
				4	4	2	2	4	1	3	2	2	2	2	2	3	4	2	2	4	2	2	4	2	2	2	4	1	2	4	2	2	2	4	3	3	4	2	1	2	1	4	3	2	2	2	2	2	4
				1	2	4	2	4	4	2	1	2	2	2	1	4	1	2	1	4	2	4	2	2	4	4	1	2	3	2	2	4	4	4	2	2	4	4	2	2	2	2	2	2	2	2	2	4	1
				1	2	3	4	4	2	2	2	4	2	4	1	4	2	2	2	2	3	2	2	4	2	1	4	4	2	2	1	2	2	2	3	4	4	2	2	2	4	1	4	2	4	2	3	2	3
				4	4	1	4	1	2	2	2	4	1	2	4	1	2	4	1	2	1	2	4	1	2	2	2	3	1	4	4	2	2	2	4	4	1	4	1	2	2	4	2	4	2	2	1	4	2
				4	3	2	4	4	4	2	4	2	2	2	2	4	4	1	2	2	3	2	2	3	4	1	2	4	1	4	2	3	1	3	2	2	1	1	1	2	4	2	4	2	2	4	4	2	2
				4	2	1	4	4	4	4	2	1	2	4	4	2	2	2	4	2	4	1	3	1	4	1	4	2	2	2	2	2	4	2	2	1	2	4	2	2	2	4	4	4	2	3	4	4	2
				4	1	4	1	2	4	3	1	4	2	2	4	2	2	1	1	2	4	3	1	1	2	3	2	1	4	4	1	1	4	4	4	2	4	4	2	2	4	1	2	2	2	2	2	2	4
				2	4	2	2	1	2	2	2	4	1	3	4	4	4	2	2	2	2	2	3	4	4	2	2	2	4	2	2	1	2	4	1	2	2	2	2	1	2	4	4	2	4	1	3	4	4
				2	1	2	2	2	2	4	2	4	2	2	2	3	2	1	2	1	4	2	2	1	2	2	2	2	2	2	2	2	2	2	2	2	4	1	2	4	2	2	2	2	3	1	1	2	2
				4	2	1	2	1	2	2	4	4	4	2	2	2	2	1	1	4	2	1	4	4	3	2	4	4	2	2	4	2	4	2	4	2	4	2	4	4	2	1	2	2	3	2	4	4	3
				2	4	3	2	2	1	2	4	4	2	4	4	2	2	3	4	2	2	2	1	1	2	2	3	2	2	4	4	3	2	2	2	2	2	4	2	1	1	2	4	2	1	2	2	4	1
				3	2	1	2	2	2	2	2	4	1	1	4	2	2	2	4	2	2	4	3	2	2	1	4	3	4	1	2	2	3	4	4	4	3	2	2	2	1	4	4	1	2	2	2	2	1
				3	2	1	2	4	3	3	2	4	4	2	4	4	2	4	4	4	3	1	3	3	4	1	2	2	4	2	4	1	4	2	2	1	3	2	4	2	2	2	3	2	2	2	1	1	2
				2	2	1	2	1	1	2	1	4	2	4	4	4	4	2	2	2	2	1	4	3	2	1	2	2	4	2	2	2	4	4	2	4	4	2	4	4	1	4	2	2	1	2	2	4	4
				2	4	4	2	1	1	3	2	1	2	2	1	2	2	4	2	2	1	4	2	4	4	2	3	2	2	4	4	2	4	1	2	2	4	2	2	4	1	4	2	2	4	2	2	1	2
				2	4	2	4	4	4	2	2	1	4	1	4	4	2	4	4	4	4	2	2	2	3	3	2	3	2	1	2	3	3	2	1	4	1	2	1	4	2	2	4	2	1	1	2	2	2
				4	2	2	4	2	2	4	3	4	2	4	2	1	4	4	3	4	2	1	1	2	4	2	2	2	4	1	2	3	2	2	2	1	1	4	4	4	4	2	3	2	2	4	4	2	1
				2	1	2	1	2	4	1	1	1	2	2	4	2	4	2	2	1	2	3	2	2	2	4	2	4	4	4	1	4	1	2	1	2	2	4	2	4	4	2	4	2	4	4	4	3	2
				2	2	2	1	2	2	2	4	4	4	2	1	4	4	2	1	4	2	4	3	2	2	2	1	4	1	2	1	2	2	2	4	4	1	1	4	2	4	1	1	2	4	2	1	3	4
				2	2	1	2	4	2	1	2	1	1	4	4	2	1	4	2	3	4	2	2	4	4	2	3	3	1	3	4	1	3	2	1	2	3	4	2	2	4	4	2	2	2	2	4	2	4
				4	2	2	2	1	4	2	2	2	4	1	2	2	1	4	2	2	2	4	1	2	2	2	2	2	1	2	4	1	4	2	2	4	2	1	3	2	2	2	4	1	4	2	2	4	1
				4	4	4	2	1	4	1	2	2	4	4	4	4	2	1	1	1	3	3	1	4	2	2	4	2	1	1	4	2	4	1	4	2	2	4	2	2	2	2	4	3	3	2	4	3	4
				3	2	2	2	2	1	4	2	2	2	2	4	2	2	2	2	4	2	2	4	4	2	2	4	4	2	4	2	4	4	4	2	2	2	1	2	2	4	1	2	2	3	2	2	4	2
				3	2	4	2	1	2	3	3	4	1	4	2	2	2	3	4	1	2	2	2	2	2	2	2	4	2	2	2	2	2	3	2	2	2	2	2	4	4	4	1	4	4	4	2	3	2
				1	2	1	1	1	3	4	2	2	2	2	2	1	4	4	2	1	2	2	4	3	2	4	3	4	2	1	2	4	3	2	2	1	4	1	2	4	2	2	2	2	4	2	1	2	4
				4	2	1	2	3	2	2	2	4	1	4	4	2	4	4	2	4	1	4	1	4	4	2	2	1	4	4	2	4	4	1	2	4	4	1	4	1	1	4	4	4	2	4	4	4	1
				4	2	2	2	4	4	2	1	4	4	2	2	4	1	4	1	2	4	1	2	1	2	2	4	2	2	1	2	2	2	1	4	2	3	2	2	2	2	2	2	2	2	4	2	1	4
				2	4	4	1	4	4	2	2	2	3	4	1	2	2	4	2	2	4	4	2	4	4	2	1	2	1	2	2	1	2	2	2	4	2	1	2	2	1	4	3	4	2	4	2	4	2
				4	4	4	4	3	2	1	1	4	2	3	4	2	4	3	4	2	1	2	2	2	2	2	2	2	4	4	2	1	2	2	2	1	2	2	2	2	1	2	4	4	4	2	1	3	2
				1	2	2	1	1	2	1	1	4	2	4	4	1	4	1	2	2	2	2	2	3	4	2	1	2	2	4	1	3	2	4	2	2	4	4	4	4	1	4	1	2	4	4	4	2	4
				2	1	2	2	2	2	2	2	2	4	4	4	2	2	2	2	1	4	4	1	4	2	4	4	4	3	2	1	2	4	2	4	2	4	4	4	4	2	4	3	2	2	4	1	2	4
				1	4	2	4	2	1	1	2	2	2	1	4	2	4	4	2	2	4	3	2	1	2	1	3	4	4	1	4	2	2	4	2	2	4	4	4	2	3	1	4	2	4	3	4	2	4
				2	4	4	4	2	3	2	2	1	4	4	4	2	4	2	4	4	2	2	4	4	4	4	2	2	4	4	1	2	2	4	2	2	1	4	2	2	2	4	2	2	1	4	2	1	2
				2	4	2	4	2	3	4	3	1	2	2	2	3	4	2	2	4	3	1	2	3	2	4	4	2	3	2	4	1	2	4	2	2	2	2	4	2	2	2	1	2	4	2	2	2	2
				2	4	4	4	2	1	2	4	1	2	4	2	2	4	2	2	4	2	2	4	2	4	1	1	2	4	4	4	2	4	4	1	2	4	2	1	4	2	1	2	4	4	2	2	1	1
				2	4	4	4	3	4	4	2	1	2	4	2	2	4	4	1	2	4	1	1	2	2	4	3	4	4	2	4	3	1	3	2	3	1	4	4	2	1	1	2	4	2	2	2	3	2
				2	4	3	4	3	4	2	2	4	1	2	2	2	4	4	2	4	2	2	2	2	4	4	2	4	2	2	4	2	2	4	2	4	2	2	4	2	4	3	2	2	4	4	4	2	1
				1	4	4	2	2	1	2	2	2	4	4	2	1	2	2	1	2	2	1	2	2	4	2	4	2	2	4	4	1	2	1	4	2	1	1	4	4	4	2	2	4	2	1	2	4	2
				4	3	2	2	4	4	2	2	2	4	2	2	1	1	1	4	3	2	1	1	4	1	2	4	1	4	2	2	2	2	2	2	2	3	4	1	4	4	4	2	2	4	1	2	2	4
				4	4	2	4	3	2	2	2	2	2	2	2	4	1	2	3	4	4	2	1	1	1	2	4	2	4	3	2	1	2	2	2	2	2	2	2	2	1	2	4	1	4	4	2	1	2
				2	4	2	1	2	2	4	4	2	3	2	3	1	1	4	2	2	2	2	2	4	2	2	2	2	3	4	2	2	2	1	3	2	2	4	2	2	1	4	4	1	2	2	2	4	2
				4	2	1	1	2	1	2	2	2	2	2	2	2	2	1	4	2	2	1	2	2	2	2	2	2	2	2	4	1	4	4	4	2	1	1	1	2	2	1	2	4	2	2	4	1	3
				2	2	4	4	4	2	2	1	4	2	4	1	4	2	2	4	3	1	3	4	4	4	2	4	2	2	3	2	4	2	2	4	2	2	1	1	2	2	1	4	2	2	4	2	2	4
				4	1	4	4	4	2	4	2	4	1	2	4	1	2	2	1	2	1	1	2	4	1	2	2	1	2	4	3	2	2	1	2	2	2	4	4	2	2	4	2	4	2	2	4	1	4
				4	2	4	1	2	2	3	2	4	3	2	2	2	2	2	4	2	2	2	4	2	1	1	2	2	2	1	3	4	4	1	2	2	2	3	2	2	2	4	2	4	2	2	2	1	3
				2	2	2	1	4	2	2	1	2	2	4	4	2	2	2	4	3	1	2	2	2	2	1	2	4	3	4	2	4	2	3	4	2	3	2	3	2	2	2	2	4	2	2	4	4	1
				4	2	1	2	2	2	1	2	2	2	3	2	2	2	1	2	2	2	2	3	2	4	2	2	2	4	4	1	4	2	4	2	2	4	2	1	1	2	4	1	4	3	2	1	2	4
				4	4	2	4	1	2	4	2	4	2	4	2	2	2	2	2	4	2	3	2	2	1	4	4	1	2	3	4	4	4	4	4	1	4	4	4	2	4	3	2	2	1	2	1	4	1
				4	3	2	2	2	4	2	2	4	3	2	2	2	3	2	2	2	4	3	2	2	4	4	4	2	4	2	2	1	2	2	2	2	1	1	4	2	4	1	2	2	2	4	2	2	2
				4	3	4	2	2	4	2	2	2	2	2	2	3	4	4	4	2	1	4	4	2	2	1	2	4	1	2	2	4	1	4	1	4	3	2	1	2	1	2	1	4	1	2	2	2	2
				1	4	2	2	1	1	3	4	2	4	2	4	4	2	2	2	1	4	2	2	2	4	4	4	4	1	2	1	2	2	2	2	2	4	1	4	2	2	4	4	2	2	1	2	4	4
				4	3	4	1	2	1	4	2	2	2	1	2	2	1	4	3	1	1	2	4	4	2	4	2	2	2	3	4	4	4	2	2	3	2	2	2	4	2	2	2	4	2	4	2	4	2
				4	2	1	2	2	1	3	3	4	2	4	4	4	4	1	2	3	2	2	4	2	4	1	3	4	2	2	2	4	2	4	1	1	4	4	2	2	2	1	3	2	2	1	4	4	3
				2	4	4	2	4	4	2	4	2	2	2	4	2	2	4	2	3	2	2	2	1	2	2	4	4	4	2	4	2	2	2	1	2	2	3	2	4	1	1	4	1	2	3	1	2	2
				1	4	4	1	3	2	1	2	2	2	2	4	2	4	1	2	2	2	1	4	1	4	1	2	2	2	2	2	2	2	4	2	2	2	2	1	4	4	2	2	1	2	4	4	4	2
				2	2	4	1	2	1	2	2	2	4	4	2	2	2	2	4	2	3	1	4	2	2	2	2	4	1	2	4	4	4	2	4	2	4	4	2	2	2	4	2	4	1	2	2	4	2
				3	4	4	2	4	2	2	4	4	4	4	4	4	1	4	2	2	1	2	2	4	2	4	4	1	3	4	4	2	2	2	4	4	4	1	2	1	2	2	4	2	4	4	2	1	1
				1	4	1	4	2	3	2	2	2	3	4	4	2	2	2	2	1	3	2	2	3	2	4	1	2	2	2	2	1	2	2	2	4	2	1	1	2	2	2	2	1	1	2	4	2	1
				2	2	3	3	4	2	4	2	4	2	2	4	4	2	4	1	2	2	2	2	2	2	2	2	4	3	2	4	2	1	4	4	4	4	2	4	2	2	2	4	4	4	4	4	1	4
				2	4	2	2	1	1	2	4	2	2	1	1	4	2	2	4	2	1	2	2	2	4	2	2	2	2	2	2	1	4	2	2	3	2	2	4	4	3	1	4	1	1	2	2	4	2
				1	1	4	2	2	4	2	2	2	4	2	4	2	2	3	2	2	4	4	4	2	2	1	4	2	2	1	2	4	1	1	3	4	3	1	3	1	1	4	1	2	3	4	4	4	2
				2	4	4	2	1	2	4	2	1	1	1	2	2	2	2	1	1	4	4	2	4	2	1	2	2	2	1	2	4	2	2	2	4	2	1	4	2	4	2	2	2	4	2	4	2	2
				4	2	1	4	4	2	2	4	2	2	4	2	2	2	1	4	3	4	2	1	1	2	2	2	2	4	4	2	2	2	2	2	4	4	2	4	1	4	2	4	3	2	4	2	4	2
				4	1	2	2	4	1	4	2	4	2	2	4	1	3	2	1	2	2	2	2	2	2	4	2	1	2	2	3	4	4	2	2	4	4	4	4	4	2	1	4	4	4	2	2	4	4
				2	4	3	2	2	2	2	2	4	2	2	1	2	2	2	4	2	2	2	2	4	1	2	4	2	2	1	2	1	2	2	2	2	2	4	4	2	4	1	3	2	2	2	1	2	4
				2	2	4	1	2	4	4	2	4	2	4	2	2	1	2	4	2	2	4	4	4	2	2	4	1	4	4	2	2	1	2	4	2	2	4	2	4	1	1	4	2	4	2	3	1	1
				2	2	2	4	2	2	2	2	1	4	2	2	4	4	3	2	2	4	2	4	2	4	1	2	2	2	4	2	4	2	4	4	1	2	4	3	2	2	2	2	2	4	4	2	2	4
				2	4	3	1	2	2	4	4	2	3	4	2	3	2	4	4	4	4	2	2	4	1	2	1	4	4	2	2	2	1	1	4	2	4	2	2	4	2	3	1	2	4	1	1	2	1
				1	2	2	2	4	2	2	2	2	2	1	1	2	4	2	2	1	2	1	4	1	1	2	1	3	3	2	2	2	4	2	2	4	2	2	4	4	4	2	1	3	4	2	4	2	2
				2	4	2	2	4	2	4	4	2	2	4	1	2	2	2	2	3	4	2	4	1	1	4	2	2	4	2	4	3	2	2	3	2	2	4	2	4	2	2	4	4	2	1	1	2	2
				4	2	2	1	2	4	4	4	2	2	2	4	2	4	2	2	4	3	4	4	2	4	4	2	1	1	2	2	2	4	2	4	1	4	2	1	4	1	2	2	2	4	2	2	4	4
				2	1	2	2	1	1	4	2	2	4	2	1	4	2	4	1	2	1	4	2	4	2	2	2	2	2	2	4	2	2	1	4	2	2	2	1	4	4	4	2	4	2	4	2	2	2
				4	2	2	2	2	3	2	2	2	3	4	2	2	4	4	2	4	1	2	1	4	4	2	3	1	4	4	1	2	4	4	2	2	4	2	2	1	4	2	2	2	2	2	4	2	3
				1	3	4	3	4	2	2	4	4	2	4	2	4	1	4	4	1	1	4	4	2	4	4	2	2	4	2	2	4	4	2	3	3	3	4	4	1	2	3	2	2	2	2	1	4	2
				2	1	2	4	4	4	4	4	1	2	4	4	2	2	2	2	2	1	2	1	4	3	4	2	4	1	3	2	4	2	4	2	2	2	4	4	2	4	2	4	4	1	2	4	2	2
				4	2	4	4	4	3	2	4	4	2	2	1	2	3	2	2	4	2	1	4	4	2	4	2	4	2	4	1	4	3	2	4	2	2	2	4	4	4	4	3	4	3	4	4	2	1
				2	2	1	3	2	2	2	4	4	4	2	2	1	2	4	1	2	4	4	1	4	4	4	2	2	2	3	1	2	3	2	2	3	4	2	4	2	1	1	2	4	2	4	4	1	4
				4	3	4	1	2	4	1	2	4	4	3	2	4	2	4	2	2	1	4	2	2	4	4	1	2	2	4	2	2	2	2	4	2	4	4	2	2	3	2	1	1	4	2	2	1	2
				2	2	4	1	3	2	2	2	4	4	4	4	3	2	2	2	4	3	4	1	3	1	4	4	4	3	1	1	4	4	2	2	2	2	1	2	2	4	2	2	2	4	2	2	2	2
				1	2	4	4	4	2	2	2	2	1	4	1	2	2	2	4	4	4	2	2	4	2	2	2	2	2	1	1	2	2	1	4	2	2	4	2	4	1	4	4	2	1	2	1	1	2
				2	2	2	2	4	4	2	2	2	3	2	4	4	1	4	4	1	2	2	2	4	4	2	2	4	4	3	4	2	4	1	4	1	2	2	2	2	2	2	2	4	1	3	2	3	4
				2	2	2	4	1	1	4	2	4	4	4	3	2	2	4	3	2	3	4	2	2	4	2	4	4	4	3	2	1	2	2	2	4	4	4	2	2	2	2	2	2	4	2	2	2	2
				4	2	1	4	3	2	4	2	4	2	3	2	2	2	2	2	2	4	2	4	4	4	2	2	2	2	1	1	2	3	4	4	2	2	2	2	2	1	2	4	2	4	2	2	4	4
				1	2	1	1	2	1	4	1	4	4	2	2	2	2	2	4	2	2	2	2	4	1	4	4	1	1	1	4	2	4	2	4	4	4	2	2	4	4	2	2	2	1	1	1	4	4
				2	2	2	2	2	3	4	4	4	2	2	4	2	4	3	2	2	4	2	1	2	1	4	2	4	2	4	2	4	2	2	4	1	2	1	1	2	2	4	2	1	3	2	2	1	4
				1	1	4	4	4	1	2	2	2	3	2	4	2	1	4	2	4	1	2	2	2	4	4	2	4	2	1	2	4	2	4	1	4	1	2	2	2	4	1	1	4	4	1	1	1	1
				2	2	4	2	4	1	2	1	2	2	2	1	1	2	2	2	2	2	2	2	2	2	3	2	3	2	2	2	4	2	4	2	4	2	1	3	2	1	1	1	3	2	1	4	1	1
				4	4	4	4	1	2	1	1	2	2	2	1	4	1	2	2	2	2	1	4	4	4	1	3	4	1	1	2	2	3	2	1	2	4	2	4	1	2	2	1	2	4	1	4	2	4
				2	1	1	4	2	4	4	1	4	2	2	2	2	4	2	4	2	2	2	1	2	1	2	2	4	2	4	3	2	1	4	3	2	2	2	2	2	4	2	1	4	2	2	2	2	3
				3	1	4	4	4	1	2	1	4	3	4	3	2	4	1	2	3	1	1	1	4	4	2	4	2	3	2	2	4	2	2	4	2	4	4	1	4	3	4	4	2	4	2	2	3	4
				4	3	2	2	3	2	2	2	4	2	2	4	4	4	1	2	2	2	2	3	4	4	2	2	4	2	4	4	2	4	2	2	4	4	4	4	4	2	2	4	1	3	2	3	4	4
				2	2	2	2	3	2	3	2	2	2	2	4	2	2	2	2	2	2	4	2	2	2	2	2	4	1	2	2	3	2	2	3	3	4	4	1	1	1	1	2	3	4	4	2	2	3
				1	1	2	1	2	1	1	2	2	2	2	4	4	1	4	3	4	2	2	4	2	2	2	2	4	2	3	2	4	2	4	2	1	1	3	2	2	2	4	2	4	2	4	4	2	2
				2	2	2	2	1	4	4	4	2	3	2	4	2	1	2	1	2	2	4	2	3	2	2	4	2	2	4	2	1	4	4	1	1	2	4	1	1	2	2	2	4	2	4	4	2	2
				2	4	2	4	4	1	1	2	4	2	2	2	2	1	4	2	1	2	2	2	4	2	2	4	1	4	2	1	2	4	1	4	4	2	2	1	2	4	2	2	4	2	2	4	4	2
				1	4	2	2	4	3	2	2	2	4	4	2	4	2	2	4	4	2	2	2	2	4	2	4	1	2	4	2	2	3	4	2	4	2	2	2	1	4	1	3	2	4	4	4	2	2
				4	3	2	2	3	4	4	1	4	3	1	4	2	1	2	2	2	2	4	2	3	4	1	4	2	2	2	2	4	2	2	2	2	3	2	2	2	4	4	2	4	2	2	4	3	2
				2	2	1	4	2	2	4	3	4	2	1	4	1	4	2	1	4	2	4	4	2	2	2	3	2	1	3	2	3	4	2	1	4	4	2	4	3	2	2	2	4	4	2	4	3	4
				4	4	2	4	2	2	4	1	2	4	2	4	4	2	2	4	2	1	2	4	2	4	2	4	2	1	2	4	2	2	1	2	2	1	2	3	2	4	2	1	1	4	2	2	4	4
				3	2	2	2	1	2	2	2	2	3	2	2	2	4	2	2	2	4	2	1	4	4	2	4	2	2	4	2	2	4	2	4	2	2	2	4	4	3	4	2	4	2	4	1	2	2
				2	4	4	2	2	2	4	3	3	2	4	3	4	4	4	2	2	3	2	2	4	2	3	2	3	2	2	4	2	2	1	1	3	3	2	2	2	1	3	4	2	4	1	4	1	2
				2	4	1	2	2	2	1	2	4	2	4	4	2	2	4	1	1	2	2	1	2	2	4	4	4	4	2	2	1	2	4	4	2	1	2	2	4	1	2	2	2	2	2	2	1	4
				2	4	2	2	4	1	4	1	3	1	2	2	2	4	2	2	4	2	1	1	2	2	2	2	2	1	2	1	1	2	3	1	2	4	2	2	2	2	2	2	2	2	3	4	2	1
				2	2	1	2	2	4	1	2	1	4	2	1	4	2	2	4	2	1	2	2	2	2	2	4	3	1	2	2	2	2	2	4	2	4	2	2	2	3	1	1	4	2	2	2	2	4
				2	4	2	2	3	2	3	3	4	2	2	4	4	4	2	2	2	2	4	4	4	2	4	2	1	1	3	1	3	4	2	1	4	2	2	2	1	4	4	2	4	4	2	2	4	2
				4	2	1	1	2	2	2	2	4	2	4	3	4	2	1	1	2	1	2	2	2	1	2	4	4	4	2	4	2	2	4	2	2	2	4	4	2	2	1	2	2	2	4	2	4	2
				2	2	4	4	2	2	2	2	2	4	2	2	4	2	2	4	4	2	3	4	3	4	2	1	1	2	4	2	2	2	2	4	2	4	3	2	4	2	4	2	2	3	1	2	4	4
				2	2	4	2	1	2	4	2	2	4	2	2	1	2	1	2	4	4	2	1	1	2	2	4	4	4	2	3	2	2	4	2	2	1	2	4	4	4	2	4	3	2	2	4	2	1
				2	3	1	4	2	1	4	2	4	2	3	2	4	2	2	1	1	4	4	2	4	4	2	1	4	1	4	3	2	2	4	4	1	1	1	2	2	2	4	2	2	4	1	2	4	3
				2	2	1	4	2	2	4	2	2	4	2	4	4	2	2	1	2	2	2	1	2	2	2	2	4	2	4	4	2	2	3	2	3	4	2	2	1	4	2	2	2	2	4	2	1	2
				2	2	2	3	2	4	1	4	4	2	2	2	4	2	2	2	2	2	1	4	4	3	4	2	2	1	2	2	2	4	2	1	2	2	2	4	2	1	4	2	4	2	2	4	4	2
				4	2	4	2	4	2	2	3	2	2	2	4	4	2	2	1	4	2	4	4	2	4	4	4	3	2	4	4	2	2	1	2	2	3	3	4	4	4	2	3	2	2	4	2	4	4
				2	2	2	4	2	4	1	2	1	2	4	2	1	3	2	2	4	4	2	4	4	2	2	3	1	3	1	4	4	2	2	1	1	2	4	1	3	2	1	1	4	2	1	2	4	2
				2	4	1	2	2	1	4	4	2	1	2	4	1	4	1	4	4	4	4	1	1	2	2	2	2	4	4	2	2	2	2	2	4	4	2	4	2	2	3	4	2	2	2	4	3	2
				4	1	2	4	4	2	4	1	2	2	2	4	1	4	4	2	2	4	4	2	1	2	4	4	2	1	2	2	2	4	4	2	2	4	4	1	4	2	2	1	2	4	4	2	2	2
				1	4	2	1	4	4	4	4	2	3	2	2	4	3	2	2	4	1	1	1	2	2	1	2	2	4	1	2	2	2	2	2	4	1	2	2	4	2	2	4	2	2	1	2	1	2
				2	4	2	2	2	2	4	4	4	2	2	1	2	2	2	4	2	4	4	2	4	2	3	4	1	4	2	1	2	2	4	2	2	2	4	2	1	2	4	4	4	4	2	4	4	1
				2	2	4	3	2	4	1	1	4	2	4	1	1	2	4	4	2	4	2	2	4	2	1	2	2	4	4	2	4	2	4	2	1	2	1	4	1	2	2	2	4	1	4	1	1	2
				4	2	2	2	2	2	2	2	4	2	3	2	4	2	4	2	4	1	4	4	2	2	2	4	3	1	1	2	4	4	2	2	2	4	2	2	1	4	1	2	2	4	2	2	4	2
				2	4	2	4	3	2	4	2	1	4	1	3	2	4	4	2	1	4	2	2	2	4	2	2	4	2	2	2	2	1	2	4	4	2	4	2	1	4	2	2	4	4	4	2	2	4
				1	1	2	2	4	1	4	1	1	2	4	4	4	2	2	4	1	4	2	4	4	3	2	4	1	1	1	2	2	2	4	4	3	2	2	2	4	1	1	2	2	2	2	2	2	3
				4	4	4	3	2	1	1	4	4	1	2	4	4	2	4	2	2	4	1	2	2	2	3	2	3	4	2	4	4	2	1	2	2	4	2	2	2	2	2	2	2	2	2	4	1	1
				1	1	2	4	3	2	3	2	2	2	4	2	1	2	4	2	4	2	2	2	2	2	2	2	4	3	4	2	4	4	1	2	3	1	2	2	1	4	4	2	4	4	2	4	2	2
				4	4	1	1	1	2	4	2	4	3	1	2	4	2	2	4	2	4	1	4	2	1	2	3	1	4	4	2	2	4	1	2	4	4	1	2	4	1	2	1	2	1	2	2	4	2
				2	1	2	4	1	4	4	2	4	2	4	2	4	4	1	4	4	2	2	1	4	4	4	3	2	1	2	3	4	2	4	2	2	2	1	2	4	4	2	2	2	4	2	2	4	1
				1	2	1	4	1	4	4	2	2	2	4	2	1	4	4	4	1	2	4	1	2	4	1	1	2	4	2	2	4	2	4	4	2	2	2	1	1	1	4	2	2	2	2	1	4	4
				4	4	1	2	2	2	2	2	1	2	3	2	2	2	2	2	4	2	4	2	4	4	2	2	2	4	4	1	2	2	4	1	2	2	4	2	1	2	3	2	4	2	2	2	1	2
				2	1	4	2	4	1	2	4	2	1	4	1	4	1	2	2	1	2	2	1	4	2	4	2	2	4	4	2	4	1	4	4	2	2	4	2	2	2	2	2	4	2	4	4	2	1
				4	2	4	4	2	1	2	2	2	2	3	2	2	2	2	3	1	4	4	1	2	2	2	2	2	2	2	2	2	2	2	2	2	4	4	2	1	2	2	2	2	2	2	2	2	1
				4	2	2	2	1	2	2	2	2	4	4	2	2	1	4	2	1	4	4	3	1	2	2	3	4	2	2	1	1	2	4	2	1	1	2	4	2	2	4	2	1	2	2	3	1	2
				2	1	1	2	2	1	2	2	1	1	2	1	1	2	4	2	2	2	2	4	2	2	2	2	2	2	4	2	2	2	1	2	1	2	1	2	1	1	2	3	4	2	4	1	2	3
				2	4	4	2	4	4	2	2	3	1	2	2	4	2	4	4	1	2	2	2	4	1	4	2	4	1	1	2	2	2	2	1	2	4	2	2	3	2	2	2	4	2	4	4	2	1
				4	4	4	2	4	2	4	4	1	2	1	3	4	1	4	4	2	1	2	1	2	4	4	2	2	1	4	4	2	3	2	1	2	1	2	1	4	2	2	2	4	1	4	2	2	2
				3	3	4	4	1	1	4	2	1	2	4	2	4	1	1	4	2	2	2	1	2	2	4	4	3	2	2	2	2	4	1	1	3	3	4	2	2	4	2	4	2	4	2	3	4	2
				4	2	2	2	2	2	4	4	2	2	2	2	4	2	4	2	2	4	4	2	2	2	2	2	3	4	1	1	2	2	1	2	2	1	2	2	2	2	2	1	2	2	2	2	3	4
				4	2	4	4	1	2	2	1	4	2	2	4	3	2	3	2	2	2	4	2	2	2	4	2	2	2	2	2	4	1	2	4	3	1	4	4	4	2	2	4	2	4	2	2	3	2
				4	2	1	2	2	2	1	2	4	2	2	4	4	1	2	3	2	4	4	4	2	2	2	2	2	2	4	2	4	1	4	4	3	2	2	2	1	2	2	2	4	2	2	2	1	2
				3	4	2	1	4	1	2	2	2	2	3	2	4	1	2	2	4	2	1	1	2	1	2	1	2	2	2	1	3	4	2	1	2	4	4	4	2	4	2	2	4	2	2	2	2	4
				4	2	2	2	2	2	4	1	2	4	4	4	2	1	2	1	2	4	2	2	4	1	4	4	2	1	4	1	2	2	2	4	2	4	2	1	4	2	2	4	2	2	4	2	2	1
				1	1	2	3	1	2	4	1	2	2	4	2	2	2	2	2	1	2	2	1	4	1	2	4	2	2	2	2	4	4	1	4	2	4	2	4	2	4	2	4	4	4	2	2	2	4
				4	4	2	4	4	2	2	3	1	2	2	2	2	2	2	4	2	2	4	2	4	2	2	4	2	3	2	1	3	2	2	2	2	4	4	4	2	4	2	4	4	2	2	1	1	2
[truncated: 1,341 more rows]
[truncated: 955 more columns]
